# Supplementary material for: Causal Association of Type 2 Diabetes Mellitus and Glycemic Traits With Cardiovascular Diseases and Lipid Traits: A Mendelian Randomization Study
Source: PubMed Central journal article supplement (PMC9072667; doi:10.3389/fendo.2022.840579), 2022-04-22
Supplement: DataSheet_1.pdf [file DataSheet_1.pdf]

# Causal Association of Type 2 Diabetes Mellitus and Glycemic Traits with Cardiovascular Events and Lipid Traits: A Mendelian Randomization Study

## *Supplementary Material*

Mingkai Huang<sup>1,2†</sup>, Loum-Davadi Laina-Nicaise<sup>1,2†</sup>, Lingfeng Zha<sup>1,2†</sup>, Tingting Tang<sup>1,2\*</sup>, Xiang Cheng<sup>1,2\*</sup>

<sup>1</sup>Department of Cardiology, Union Hospital, Tongji Medical College, Huazhong University of Science and Technology, Wuhan, China

<sup>2</sup>Key Laboratory of Biological Targeted Therapy of the Ministry of Education, Union Hospital, Tongji Medical College, Huazhong University of Science and Technology, Wuhan, China

**Figure S1** Study overview.

**Table S1** Phenotype source and description.

**Table S2** Genetic variants associated with exposures.

**Table S3** Definition and sources for CVDs in FinnGen.

**Table S4** The causal effect of genetically predicted type 2 diabetes mellitus on outcomes in different studies.

**Table S5** The causal effect of genetically predicted FG on outcomes in different studies.

**Table S6** The causal effect of genetically predicted FI on outcomes in different studies.

**Table S7** The causal effect of genetically predicted HbA<sub>1c</sub> on outcomes in different studies.

**Table S8** HDL cholesterol as a mediator in the causal pathway between type 2 diabetes mellitus and risk of CVDs.

**Table S9** Triglycerides as a mediator in the causal pathway between type 2 diabetes mellitus and risk of CVDs.

**Table S10** Apolipoprotein A as a mediator in the causal pathway between type 2 diabetes mellitus and risk of CVDs.

**Table S11** Multivariable Mendelian randomization using IVW method.

## Supplementary Figure

Figure S1 Study Overview.

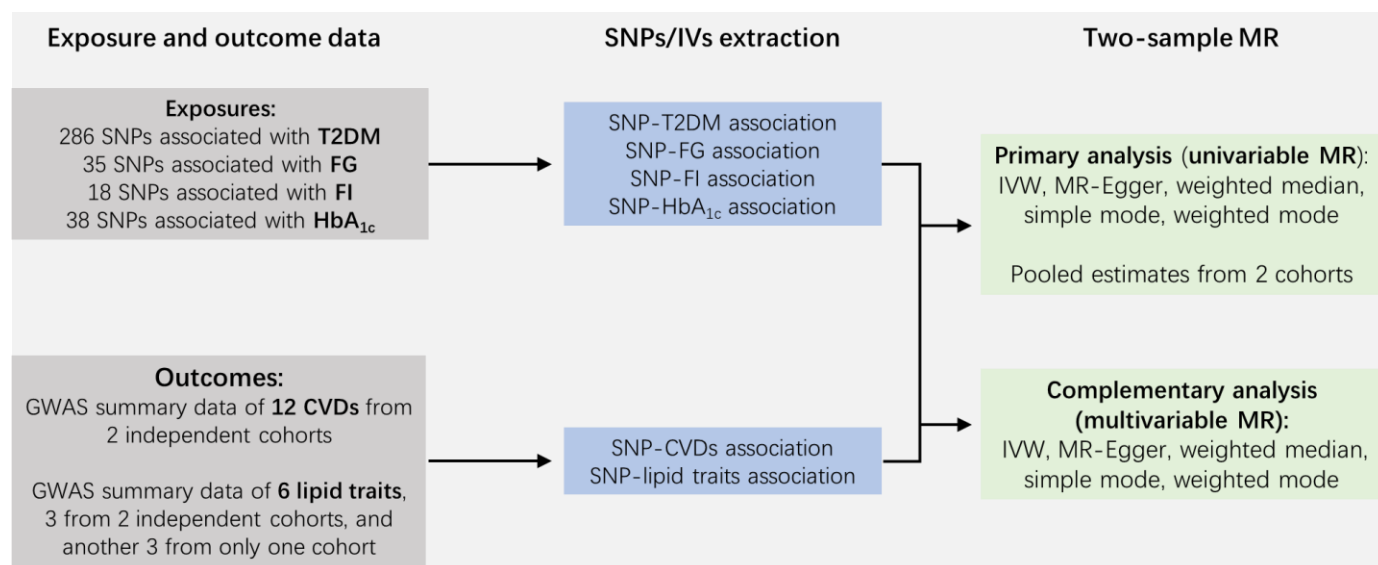

## Supplementary Tables

Table S1 Phenotype source and description.

| Phenotypes               | Consortium or study         | No. of cases | No. of controls | Data type  | GWAS ID                           |
|--------------------------|-----------------------------|--------------|-----------------|------------|-----------------------------------|
| <b>Exposure</b>          |                             |              |                 |            |                                   |
| Type 2 diabetes mellitus | DIAGRAM                     | 74124        | 824006          | Binary     | NA                                |
| Fasting blood glucose    | MAGIC                       | NA           | NA              | Continuous | NA                                |
| Fasting insulin          | MAGIC                       | NA           | NA              | Continuous | NA                                |
| HbA <sub>1c</sub>        | MAGIC                       | NA           | NA              | Continuous | NA                                |
| <b>CVDs</b>              |                             |              |                 |            |                                   |
| Myocardial infarction    | CARDIoGRAMplusC4D / FinnGen | 43676/4065   | 128199/85760    | Binary     | ieu-a-798/finn-a-l9_MI            |
| Heart failure            | HERMES/ FinnGen             | 47309/8016   | 930014/75137    | Binary     | ebi-a-GCST009541/finn-a-HEARTFAIL |

|                                           |                                      |             |              |            |                                        |
|-------------------------------------------|--------------------------------------|-------------|--------------|------------|----------------------------------------|
| <b>Ischemic heart disease</b>             | CARDIoGRAMplusC4D / FinnGen          | 60801/10739 | 123504/85760 | Binary     | ieu-a-7/finn-a-19_ISCHHEART            |
| <b>Coronary atherosclerosis</b>           | UKB/ FinnGen                         | 14334/7661  | 34860/85760  | Binary     | ukb-d-19_CORATHER / finn-a-19_CORATHER |
| <b>Major coronary heart disease event</b> | UKB/ FinnGen                         | 10157/7123  | 351037/89376 | Binary     | ukb-d-19_CHD/finn-a-19_CHD             |
| <b>Peripheral artery disease</b>          | BBJ/ FinnGen                         | 7114/2398   | 475964/92349 | Binary     | bbj-a-144/finn-a-19_PAD                |
| <b>Essential hypertension</b>             | UKB/ FinnGen                         | 54358/22142 | 408652/69160 | Binary     | ukb-b-12493/finn-a-19_HYPTENS          |
| <b>Stroke</b>                             | MEGASTROKE/ FinnGen                  | 40585/7144  | 406111/75420 | Binary     | ebi-a-GCST006906/finn-a-C_STROKE       |
| <b>Ischemic stroke</b>                    | MEGASTROKE/ FinnGen                  | 34217/4026  | 406111/90211 | Binary     | ebi-a-GCST006908/finn-a-19_STR_EXH     |
| <b>Intracerebral hemorrhage</b>           | UKB/ FinnGen                         | 1253/1149   | 359941/90757 | Binary     | ukb-d-19_INTRACRA/finn-a-19_ICH        |
| <b>Atrial fibrillation and fluttering</b> | Multi-cohorts <sup>a</sup> / FinnGen | 62620/7244  | 970216/56378 | Binary     | ebi-a-GCST006414/finn-a-19_AF          |
| <b>Cardiovascular mortality</b>           | UKB/ FinnGen                         | 1597/3480   | 359597/93019 | Binary     | ukb-d-19_K_CARDIA/finn-a-19_K_CARDIAC  |
| <b>Lipid traits</b>                       |                                      |             |              |            |                                        |
| <b>HDL cholesterol</b>                    | UKB/ GLGC                            | NA          | NA           | Continuous | ukb-d-30760_irnt/ieu-a-299             |
| <b>LDL cholesterol</b>                    | UKB/ GLGC                            | NA          | NA           | Continuous | ukb-d-30780_irnt/ieu-a-300             |
| <b>Triglycerides</b>                      | UKB/ GLGC                            | NA          | NA           | Continuous | ukb-d-30870_irnt/                      |

|                         |     |    |    |            |                  |
|-------------------------|-----|----|----|------------|------------------|
|                         |     |    |    |            | ieu-a-302        |
| <b>Apolipoprotein A</b> | UKB | NA | NA | Continuous | ukb-d-30630_irnt |
| <b>Apolipoprotein B</b> | UKB | NA | NA | Continuous | ukb-d-30640_irnt |
| <b>Lipoprotein A</b>    | UKB | NA | NA | Continuous | ukb-d-30790_irnt |

<sup>a</sup>From a meta-analysis of six contributing studies (The Nord-Trøndelag Health Study (HUNT), deCODE, the Michigan Genomics Initiative (MGI), DiscovEHR, UK Biobank, and the AFGen Consortium)

**Table S2** Genetic variants associated with exposures.

| SNP                                   | Chromosome | Gene         | Beta  | SE    | <i>p</i> value | F-statistics |
|---------------------------------------|------------|--------------|-------|-------|----------------|--------------|
| <b>Type 2 diabetes mellitus (286)</b> |            |              |       |       |                | 285.95       |
| rs1005752                             | 15         | HMG20A       | 0.077 | 0.007 | 2.50E-29       | 323.76       |
| rs10096633                            | 8          | LPL          | 0.068 | 0.010 | 1.10E-12       | 92.56        |
| rs10097617                            | 8          | TP53INP1     | 0.039 | 0.007 | 3.30E-11       | 102.93       |
| rs10193538                            | 2          | BNIP1        | 0.039 | 0.007 | 8.90E-09       | 97.99        |
| rs10195252                            | 2          | GRB14/COBLL1 | 0.068 | 0.005 | 6.00E-25       | 424.22       |
| rs10228066                            | 7          | DGKB         | 0.068 | 0.007 | 1.10E-28       | 311.11       |
| rs10406431                            | 19         | GIPR         | 0.049 | 0.005 | 9.60E-14       | 224.32       |
| rs1042725                             | 12         | HMG2         | 0.049 | 0.007 | 1.80E-13       | 162.49       |
| rs1061810                             | 11         | HSD17B12     | 0.049 | 0.007 | 6.00E-13       | 133.88       |
| rs10750397                            | 11         | ETS1         | 0.049 | 0.007 | 8.30E-13       | 131.08       |
| rs10757283                            | 9          | CDKN2A/B     | 0.104 | 0.009 | 1.70E-41       | 558.65       |
| rs10811660                            | 9          | CDKN2A/B     | 0.239 | 0.010 | 1.40E-115      | 1530.24      |
| rs10830963                            | 11         | MTNR1B       | 0.095 | 0.007 | 4.80E-43       | 492.92       |
| rs10842994                            | 12         | KLHDC5       | 0.077 | 0.007 | 4.10E-20       | 247.14       |
| rs10882101                            | 10         | HHEX/IDE     | 0.058 | 0.010 | 1.40E-08       | 154.26       |
| rs10893829                            | 11         | ETS1         | 0.058 | 0.010 | 1.30E-10       | 81.30        |
| rs10937721                            | 4          | WFS1         | 0.058 | 0.010 | 1.50E-08       | 154.26       |
| rs10938398                            | 4          | GNPDA2       | 0.049 | 0.007 | 3.60E-12       | 159.37       |
| rs10954772                            | 8          | PURG         | 0.039 | 0.007 | 1.80E-09       | 88.10        |
| rs10962                               | 17         | HNF1B        | 0.049 | 0.010 | 9.90E-10       | 80.60        |
| rs10974438                            | 9          | GLIS3        | 0.049 | 0.007 | 1.50E-14       | 149.81       |

|            |    |               |       |       |          |        |
|------------|----|---------------|-------|-------|----------|--------|
| rs11042596 | 11 | INS/IGF2      | 0.039 | 0.005 | 2.00E-08 | 127.50 |
| rs11063028 | 12 | CCND2         | 0.058 | 0.007 | 8.50E-11 | 134.46 |
| rs11070332 | 15 | LTK           | 0.049 | 0.005 | 1.10E-13 | 209.75 |
| rs11137820 | 9  | MTND2P8       | 0.039 | 0.007 | 2.90E-08 | 100.34 |
| rs11202627 | 10 | PTEN          | 0.058 | 0.010 | 4.70E-08 | 81.30  |
| rs11257655 | 10 | CDC123/CAMK1D | 0.086 | 0.007 | 1.50E-32 | 343.78 |
| rs1127215  | 1  | PTGFRN        | 0.049 | 0.005 | 1.60E-13 | 221.77 |
| rs11341409 | 2  | CRYBA2        | 0.113 | 0.020 | 6.60E-09 | 57.48  |
| <b>3</b>   |    |               |       |       |          |        |
| rs11496066 | 7  | FBXL13        | 0.077 | 0.014 | 1.10E-08 | 118.49 |
| rs11550561 | 5  | PAM           | 0.174 | 0.015 | 1.30E-30 | 181.76 |
| <b>4</b>   |    |               |       |       |          |        |
| rs11642430 | 16 | FAM57B        | 0.039 | 0.005 | 2.20E-09 | 138.40 |
| rs11680058 | 2  | FAM49A        | 0.058 | 0.010 | 1.40E-08 | 76.77  |
| rs11688682 | 2  | GLI2          | 0.049 | 0.007 | 4.20E-09 | 128.16 |
| rs11699802 | 20 | CEBPB         | 0.039 | 0.007 | 1.80E-11 | 102.31 |
| rs11700101 | 22 | YWHAH         | 0.068 | 0.012 | 1.70E-08 | 59.82  |
| <b>3</b>   |    |               |       |       |          |        |
| rs11708067 | 3  | ADCY5         | 0.086 | 0.007 | 5.20E-32 | 354.80 |
| rs11709077 | 3  | PPARG         | 0.131 | 0.011 | 1.80E-36 | 312.37 |
| rs11748389 | 15 | TCF12         | 0.095 | 0.016 | 3.90E-08 | 41.06  |
| <b>4</b>   |    |               |       |       |          |        |
| rs11759026 | 6  | CENPW         | 0.068 | 0.007 | 2.40E-18 | 221.79 |
| rs11820019 | 11 | CCND1         | 0.148 | 0.020 | 5.10E-12 | 60.41  |
| rs11842871 | 13 | HMGBl         | 0.039 | 0.007 | 1.20E-08 | 79.25  |
| rs11926707 | 3  | KIF9          | 0.239 | 0.042 | 2.10E-08 | 601.28 |
| rs12001437 | 9  | UBAP2         | 0.039 | 0.007 | 2.80E-10 | 96.01  |
| rs12140153 | 1  | PATJ          | 0.068 | 0.012 | 1.30E-08 | 59.82  |
| rs12454712 | 18 | BCL2A         | 0.049 | 0.005 | 4.60E-13 | 216.58 |
| rs1260326  | 2  | GCKR          | 0.068 | 0.005 | 6.50E-25 | 417.20 |
| rs12640250 | 4  | LCORL         | 0.039 | 0.005 | 3.70E-08 | 116.25 |
| rs12642790 | 4  | SCD5          | 0.039 | 0.007 | 4.40E-10 | 92.43  |
| rs12719778 | 8  | BOP1          | 0.039 | 0.005 | 5.00E-09 | 143.24 |
| rs12811407 | 12 | FBRSL1        | 0.049 | 0.007 | 1.70E-12 | 143.76 |
| rs12910825 | 15 | PRC1          | 0.049 | 0.007 | 1.60E-15 | 149.81 |
| rs12920022 | 16 | SPG7          | 0.049 | 0.007 | 3.40E-09 | 87.38  |
| rs1296328  | 4  | PABPC4L       | 0.039 | 0.007 | 3.50E-08 | 101.94 |
| rs13024606 | 2  | GRB14/COBLL1  | 0.086 | 0.016 | 1.70E-08 | 41.62  |
| rs13041756 | 20 | NKX2.2        | 0.058 | 0.010 | 1.40E-08 | 62.43  |
| rs13065698 | 3  | MBNL1         | 0.049 | 0.007 | 8.10E-13 | 156.06 |
| rs13085136 | 3  | SHQ1          | 0.077 | 0.012 | 1.50E-08 | 60.97  |
| rs1316776  | 5  | DMGDH         | 0.049 | 0.007 | 2.60E-12 | 147.93 |
| rs13262861 | 8  | ANK1          | 0.068 | 0.010 | 4.00E-12 | 123.68 |

## Supplementary Material

|            |    |         |       |       |          |        |
|------------|----|---------|-------|-------|----------|--------|
| rs13426680 | 2  | CYTIP   | 0.086 | 0.012 | 6.70E-10 | 65.89  |
| rs1359790  | 13 | SPRY2   | 0.086 | 0.007 | 2.40E-31 | 403.91 |
| rs13737    | 15 | PTPN9   | 0.049 | 0.007 | 5.60E-10 | 118.60 |
| rs1377807  | 17 | ZZEF1   | 0.049 | 0.007 | 4.20E-13 | 139.08 |
| rs13833755 | 5  | SLCO6A1 | 0.445 | 0.077 | 4.70E-09 | 17.49  |
| 6          |    |         |       |       |          |        |
| rs14024215 | 10 | TCF7L2  | 0.307 | 0.056 | 2.20E-08 | 31.58  |
| 0          |    |         |       |       |          |        |
| rs1412234  | 9  | LINGO2  | 0.039 | 0.007 | 1.90E-10 | 89.63  |
| rs14152172 | 11 | PDE3B   | 0.122 | 0.020 | 2.70E-08 | 27.65  |
| 1          |    |         |       |       |          |        |
| rs1421085  | 16 | FTO     | 0.122 | 0.007 | 3.10E-84 | 982.82 |
| rs1426371  | 12 | WSCD2   | 0.049 | 0.007 | 8.20E-12 | 125.10 |
| rs14567801 | 11 | QSER1   | 0.104 | 0.016 | 2.00E-10 | 49.20  |
| 4          |    |         |       |       |          |        |
| rs14590438 | 1  | FAM63A  | 0.174 | 0.030 | 2.60E-08 | 18.94  |
| 1          |    |         |       |       |          |        |
| rs14688610 | 5  | ANKH    | 0.344 | 0.049 | 7.80E-13 | 45.32  |
| 8          |    |         |       |       |          |        |
| rs14936442 | 8  | CPQ     | 0.239 | 0.034 | 1.80E-12 | 31.53  |
| 8          |    |         |       |       |          |        |
| rs1493694  | 1  | NOTCH2  | 0.086 | 0.009 | 2.70E-16 | 152.51 |
| rs1531583  | 4  | PCGF3   | 0.122 | 0.016 | 3.50E-14 | 83.76  |
| rs1561927  | 8  | PVT1    | 0.039 | 0.007 | 1.50E-09 | 81.18  |
| rs1562396  | 7  | KLF14   | 0.058 | 0.007 | 9.90E-18 | 198.25 |
| rs1580278  | 4  | SLC9B1  | 0.039 | 0.005 | 2.20E-10 | 143.65 |
| rs1641523  | 17 | ATP1B2  | 0.049 | 0.007 | 1.20E-10 | 159.37 |
| rs17013314 | 3  | UBE2E2  | 0.104 | 0.018 | 8.40E-09 | 33.14  |
| rs1708302  | 7  | JAZF1   | 0.095 | 0.007 | 1.10E-48 | 611.10 |
| rs17122772 | 14 | SLC7A7  | 0.039 | 0.007 | 1.60E-08 | 72.94  |
| rs17168486 | 7  | DGKB    | 0.068 | 0.007 | 2.30E-17 | 184.84 |
| rs17250977 | 5  | ANKH    | 0.113 | 0.016 | 2.00E-11 | 58.09  |
| rs17261179 | 5  | ITGA1   | 0.039 | 0.007 | 1.30E-08 | 102.81 |
| rs17522122 | 14 | AKAP6   | 0.039 | 0.005 | 3.20E-09 | 143.65 |
| rs17684074 | 18 | WDR7    | 0.039 | 0.007 | 2.90E-08 | 79.25  |
| rs17689007 | 8  | MSRA    | 0.039 | 0.005 | 2.50E-09 | 143.65 |
| rs177045   | 10 | NEUROG3 | 0.068 | 0.007 | 6.60E-18 | 272.53 |
| rs17772814 | 8  | CASC11  | 0.077 | 0.014 | 5.40E-10 | 59.08  |
| rs17791513 | 9  | TLE4    | 0.095 | 0.012 | 3.10E-14 | 92.81  |
| rs17802463 | 2  | DTNB    | 0.039 | 0.005 | 2.90E-08 | 113.66 |
| rs17819328 | 3  | PPARG   | 0.058 | 0.007 | 4.80E-16 | 223.31 |
| rs1783541  | 11 | MAP3K11 | 0.058 | 0.007 | 2.00E-14 | 145.76 |

|            |    |         |       |       |          |        |
|------------|----|---------|-------|-------|----------|--------|
| rs17836088 | 14 | NRXN3   | 0.058 | 0.010 | 6.70E-14 | 109.43 |
| rs1800574  | 12 | HNF1A   | 0.131 | 0.020 | 1.70E-12 | 47.33  |
| rs1800961  | 20 | HNF4A   | 0.166 | 0.017 | 2.30E-22 | 117.99 |
| rs1801645  | 22 | PIM3    | 0.039 | 0.007 | 1.50E-08 | 83.03  |
| rs18450920 | 10 | TCF7L2  | 0.191 | 0.025 | 1.20E-13 | 54.21  |
| 1          |    |         |       |       |          |        |
| rs18466082 | 1  | DENND2C | 2.086 | 0.375 | 2.50E-08 | 4.40   |
| 9          |    |         |       |       |          |        |
| rs2028150  | 2  | CEP68   | 0.049 | 0.007 | 2.30E-12 | 156.06 |
| rs2066827  | 12 | CDKN1B  | 0.049 | 0.007 | 4.20E-08 | 118.60 |
| rs2102278  | 4  | USP46   | 0.039 | 0.007 | 3.70E-08 | 89.63  |
| rs2197973  | 12 | USP44   | 0.039 | 0.007 | 3.60E-08 | 102.31 |
| rs2237895  | 11 | KCNQ1   | 0.113 | 0.007 | 6.00E-52 | 848.22 |
| rs2237897  | 11 | KCNQ1   | 0.207 | 0.017 | 8.40E-32 | 226.98 |
| rs2238689  | 19 | GIPR    | 0.039 | 0.005 | 5.40E-09 | 140.48 |
| rs2249105  | 2  | CEP68   | 0.095 | 0.012 | 2.20E-14 | 332.41 |
| rs2258238  | 12 | HMGA2   | 0.095 | 0.012 | 4.50E-21 | 128.31 |
| rs2268078  | 20 | RALY    | 0.039 | 0.007 | 2.30E-10 | 92.43  |
| rs2272163  | 3  | ROBO2   | 0.039 | 0.007 | 9.60E-09 | 97.04  |
| rs2280141  | 10 | PLEKHA1 | 0.049 | 0.007 | 1.40E-13 | 162.30 |
| rs2283220  | 11 | KCNQ1   | 0.049 | 0.007 | 1.40E-09 | 139.08 |
| rs2307111  | 5  | POC5    | 0.049 | 0.007 | 2.10E-16 | 154.69 |
| rs231349   | 11 | KCNQ1   | 0.068 | 0.012 | 2.30E-11 | 65.74  |
| rs231361   | 11 | KCNQ1   | 0.077 | 0.007 | 5.00E-25 | 308.98 |
| rs234853   | 11 | KCNQ1   | 0.077 | 0.009 | 6.80E-16 | 234.18 |
| rs243024   | 2  | BCL11A  | 0.058 | 0.005 | 2.50E-20 | 316.88 |
| rs2431115  | 5  | ANKRD55 | 0.039 | 0.007 | 3.90E-10 | 98.85  |
| rs2456530  | 15 | ONECUT1 | 0.058 | 0.010 | 5.40E-09 | 72.12  |
| rs2581787  | 3  | RFT1    | 0.039 | 0.007 | 2.40E-08 | 101.49 |
| rs2642588  | 10 | NEUROG3 | 0.049 | 0.007 | 2.20E-14 | 136.55 |
| rs2767036  | 11 | PDHX    | 0.039 | 0.007 | 3.30E-08 | 84.81  |
| rs2796441  | 9  | TLE1    | 0.068 | 0.007 | 4.40E-24 | 302.97 |
| rs279744   | 5  | ARL15   | 0.039 | 0.005 | 3.10E-08 | 123.35 |
| rs2800733  | 6  | SOGA3   | 0.049 | 0.007 | 6.00E-11 | 131.08 |
| rs2820446  | 1  | LYPLAL1 | 0.058 | 0.007 | 3.30E-16 | 187.59 |
| rs28505901 | 9  | GPSM1   | 0.086 | 0.009 | 6.70E-26 | 292.14 |
| rs2872246  | 3  | ABCC5   | 0.039 | 0.007 | 1.50E-08 | 101.94 |
| rs28819812 | 4  | PDGFC   | 0.039 | 0.007 | 2.20E-08 | 89.63  |
| rs291367   | 1  | GNG4    | 0.039 | 0.007 | 4.70E-10 | 96.01  |
| rs2925979  | 16 | CMIP    | 0.049 | 0.007 | 1.40E-14 | 136.55 |
| rs2972144  | 2  | IRS1    | 0.095 | 0.007 | 2.10E-46 | 563.38 |
| rs2982521  | 6  | MIR3668 | 0.049 | 0.007 | 1.30E-09 | 153.19 |
| rs3111316  | 19 | FARSA   | 0.049 | 0.007 | 6.30E-13 | 157.29 |

## Supplementary Material

|            |    |             |       |       |          |        |
|------------|----|-------------|-------|-------|----------|--------|
| rs3217792  | 12 | CCND2       | 0.113 | 0.011 | 2.60E-21 | 180.23 |
| rs3217860  | 12 | CCND2       | 0.049 | 0.007 | 3.90E-09 | 125.10 |
| rs329122   | 5  | PHF15       | 0.039 | 0.005 | 3.60E-09 | 141.34 |
| rs340874   | 1  | PROX1       | 0.068 | 0.007 | 1.60E-22 | 308.61 |
| rs34298980 | 6  | LRFN2       | 0.039 | 0.005 | 9.30E-10 | 144.17 |
| rs34454109 | 20 | TSHZ2       | 0.039 | 0.007 | 7.10E-09 | 72.94  |
| rs34584161 | 13 | RNF6        | 0.049 | 0.007 | 2.20E-10 | 118.60 |
| rs34715063 | 15 | RASGRP1     | 0.095 | 0.012 | 2.30E-19 | 150.56 |
| rs348330   | 1  | ABCB10      | 0.049 | 0.007 | 2.70E-14 | 149.81 |
| rs34855406 | 17 | MLX         | 0.049 | 0.007 | 2.30E-12 | 131.08 |
| rs34855922 | 10 | TCF7L2      | 0.049 | 0.007 | 5.50E-12 | 131.08 |
| rs34965774 | 12 | KSR2        | 0.058 | 0.010 | 2.00E-09 | 76.77  |
| rs35352848 | 3  | UBE2E2      | 0.068 | 0.010 | 1.30E-17 | 145.42 |
| rs35895680 | 17 | TLL6        | 0.058 | 0.007 | 2.50E-15 | 198.25 |
| rs35913461 | 2  | TMEM18      | 0.058 | 0.010 | 1.60E-11 | 89.98  |
| rs35999103 | 2  | PABPC1P2    | 0.049 | 0.010 | 9.70E-09 | 61.17  |
| rs362307   | 4  | HTT         | 0.077 | 0.012 | 1.10E-09 | 68.93  |
| rs3751837  | 16 | CLUAP1      | 0.039 | 0.007 | 1.40E-08 | 70.68  |
| rs3768321  | 1  | MACF1       | 0.086 | 0.007 | 2.60E-26 | 320.53 |
| rs3772071  | 2  | RBMS1       | 0.049 | 0.007 | 1.20E-11 | 133.88 |
| rs3774723  | 3  | PSMD6       | 0.068 | 0.010 | 1.60E-13 | 117.81 |
| rs3798519  | 6  | TFAP2B      | 0.058 | 0.010 | 2.60E-12 | 94.12  |
| rs3802177  | 8  | SLC30A8     | 0.104 | 0.007 | 1.10E-55 | 626.88 |
| rs3810291  | 19 | ZC3H4       | 0.049 | 0.007 | 8.90E-12 | 143.76 |
| rs3811978  | 5  | ITGA1       | 0.058 | 0.007 | 7.70E-11 | 128.54 |
| rs3845281  | 5  | ANKH        | 0.077 | 0.009 | 2.30E-11 | 112.39 |
| rs3887925  | 3  | ST6GAL1     | 0.068 | 0.007 | 3.10E-22 | 309.99 |
| rs39328    | 7  | RELN        | 0.039 | 0.007 | 3.70E-08 | 100.95 |
| rs3934712  | 5  | EBF1        | 0.049 | 0.010 | 3.20E-08 | 75.50  |
| rs4148856  | 12 | MPHOSPH9    | 0.049 | 0.010 | 1.70E-10 | 78.10  |
| rs4238013  | 12 | CCND2       | 0.058 | 0.007 | 3.20E-11 | 151.14 |
| rs4279506  | 7  | IGF2BP3     | 0.058 | 0.010 | 4.80E-08 | 151.71 |
| rs4281707  | 16 | FTO         | 0.039 | 0.005 | 3.20E-10 | 143.24 |
| rs429358   | 19 | TOMM40/APOE | 0.077 | 0.009 | 2.60E-18 | 159.23 |
| rs4457053  | 5  | ZBED3       | 0.058 | 0.007 | 8.40E-18 | 191.32 |
| rs465002   | 5  | ANKRD55     | 0.104 | 0.007 | 6.10E-38 | 563.83 |
| rs4686471  | 3  | LPP         | 0.058 | 0.007 | 1.70E-20 | 216.75 |
| rs4688760  | 3  | RBM6        | 0.039 | 0.007 | 3.50E-10 | 89.63  |
| rs4709746  | 6  | QKI         | 0.058 | 0.010 | 5.80E-09 | 72.12  |
| rs474513   | 6  | SLC22A3     | 0.039 | 0.005 | 8.10E-10 | 143.94 |
| rs4776970  | 15 | MAP2K5      | 0.039 | 0.005 | 5.00E-09 | 132.86 |
| rs4804833  | 19 | MAP2K7      | 0.049 | 0.007 | 7.70E-13 | 154.69 |



|            |    |            |       |       |          |        |
|------------|----|------------|-------|-------|----------|--------|
| rs4810426  | 20 | HNF4A      | 0.086 | 0.012 | 3.10E-17 | 114.38 |
| rs4923543  | 11 | METTL15    | 0.039 | 0.007 | 4.50E-08 | 91.07  |
| rs4925109  | 17 | RAI1       | 0.049 | 0.007 | 2.80E-12 | 141.49 |
| rs4929965  | 11 | INS/IGF2   | 0.068 | 0.007 | 4.00E-26 | 295.08 |
| rs4932265  | 15 | AP3S2      | 0.068 | 0.007 | 4.20E-20 | 246.85 |
| rs4946812  | 6  | BEND3      | 0.039 | 0.005 | 8.20E-09 | 127.50 |
| rs4976033  | 5  | PIK3R1     | 0.049 | 0.007 | 1.00E-09 | 157.29 |
| rs4977213  | 8  | BOP1       | 0.049 | 0.007 | 9.10E-14 | 153.19 |
| rs505922   | 9  | ABO        | 0.049 | 0.007 | 3.90E-12 | 143.76 |
| rs5213     | 11 | KCNJ11     | 0.068 | 0.007 | 3.50E-27 | 288.56 |
| rs523288   | 18 | MC4R       | 0.049 | 0.007 | 7.60E-13 | 118.60 |
| rs52835091 | 15 | WDR72      | 0.239 | 0.042 | 2.10E-08 | 25.52  |
| 1          |    |            |       |       |          |        |
| rs53664341 | 10 | TCF7L2     | 0.405 | 0.073 | 2.60E-08 | 42.16  |
| 8          |    |            |       |       |          |        |
| rs539515   | 1  | SEC16B     | 0.049 | 0.007 | 1.60E-10 | 104.03 |
| rs55540274 | 6  | SLC25A51P1 | 1.3   | 0.239 | 4.60E-08 | 5.36   |
| 8          |    |            |       |       |          |        |
| rs55575934 | 11 | INS/IGF2   | 0.322 | 0.059 | 3.60E-08 | 16.24  |
| 1          |    |            |       |       |          |        |
| rs55653563 | 9  | ZNF169     | 0.039 | 0.007 | 2.20E-09 | 81.18  |
| rs56238620 | 2  | DDX18      | 1.163 | 0.213 | 4.20E-08 | 7.22   |
| 2          |    |            |       |       |          |        |
| rs56337234 | 4  | MAEA       | 0.058 | 0.007 | 8.60E-18 | 227.78 |
| rs56348580 | 12 | HNF1A      | 0.049 | 0.007 | 2.30E-13 | 139.08 |
| rs56951154 | 17 | KIF2B      | 2.032 | 0.358 | 1.50E-08 | 4.37   |
| 1          |    |            |       |       |          |        |
| rs57235767 | 11 | MTNR1B     | 0.039 | 0.007 | 5.90E-10 | 84.81  |
| rs57327348 | 8  | XKR6       | 0.039 | 0.010 | 4.50E-08 | 49.47  |
| rs5758223  | 22 | EP300      | 0.039 | 0.005 | 3.80E-08 | 116.25 |
| rs576674   | 13 | KL         | 0.049 | 0.007 | 8.30E-10 | 91.74  |
| rs58432198 | 1  | FAF1       | 0.068 | 0.010 | 2.10E-10 | 92.56  |
| rs58730668 | 4  | ACSL1      | 0.068 | 0.010 | 1.30E-13 | 105.53 |
| rs59944054 | 20 | TCEA2      | 0.058 | 0.010 | 1.50E-08 | 116.31 |
| rs601945   | 6  | MHC        | 0.058 | 0.010 | 4.70E-08 | 94.12  |
| rs60276348 | 17 | ACE        | 0.049 | 0.010 | 2.60E-08 | 54.80  |
| rs6063048  | 20 | EYA2       | 0.049 | 0.007 | 2.20E-11 | 128.16 |
| rs62007683 | 14 | MARK3      | 0.039 | 0.007 | 3.10E-08 | 93.70  |
| rs62080313 | 18 | COMMD9     | 0.058 | 0.010 | 1.00E-08 | 67.34  |
| rs62107261 | 2  | TMEM18     | 0.113 | 0.016 | 3.80E-12 | 71.86  |
| rs62271373 | 3  | TSC22D2    | 0.086 | 0.014 | 1.00E-09 | 56.48  |
| rs62492368 | 7  | AOC1       | 0.049 | 0.007 | 1.10E-10 | 139.08 |
| rs6458354  | 6  | VEGFA      | 0.049 | 0.007 | 2.10E-12 | 133.88 |

## Supplementary Material

|            |    |              |       |       |          |        |
|------------|----|--------------|-------|-------|----------|--------|
| rs6459733  | 7  | MNX1         | 0.058 | 0.005 | 2.40E-17 | 282.04 |
| rs649961   | 3  | SLC12A8      | 0.039 | 0.005 | 9.90E-10 | 143.65 |
| rs6518681  | 22 | MTMR3/ASCC2  | 0.086 | 0.012 | 1.10E-12 | 95.69  |
| rs6545714  | 2  | BNIP1        | 0.039 | 0.007 | 8.90E-09 | 97.99  |
| rs6600191  | 16 | ITFG3        | 0.058 | 0.007 | 9.30E-13 | 128.54 |
| rs6708643  | 2  | THADA        | 0.039 | 0.007 | 3.90E-08 | 102.97 |
| rs67232546 | 11 | ETS1         | 0.058 | 0.007 | 1.30E-11 | 151.14 |
| rs67254669 | 11 | KCNJ11       | 0.637 | 0.111 | 1.10E-08 | 7.61   |
| rs6780171  | 3  | IGF2BP2      | 0.131 | 0.009 | 9.00E-56 | 773.72 |
| rs6821438  | 4  | SMARCA1      | 0.039 | 0.007 | 4.00E-11 | 102.60 |
| rs6884702  | 5  | MRPS30       | 0.039 | 0.007 | 1.50E-10 | 97.99  |
| rs6885132  | 5  | ANKH         | 0.068 | 0.012 | 1.70E-08 | 65.74  |
| rs6976111  | 7  | CTTNBP2      | 0.039 | 0.007 | 1.20E-08 | 88.10  |
| rs7022807  | 9  | HAUS6        | 0.039 | 0.005 | 2.70E-10 | 138.40 |
| rs702634   | 5  | ARL15        | 0.049 | 0.007 | 7.70E-14 | 139.08 |
| rs7115753  | 11 | CRY2         | 0.039 | 0.005 | 3.80E-09 | 142.73 |
| rs7124681  | 11 | CELF1        | 0.039 | 0.005 | 5.10E-09 | 139.50 |
| rs71372253 | 17 | NF1          | 0.077 | 0.012 | 4.40E-08 | 52.82  |
| rs7178762  | 15 | USP3         | 0.039 | 0.005 | 5.40E-10 | 143.24 |
| rs718314   | 12 | ITPR2        | 0.049 | 0.007 | 8.40E-11 | 121.91 |
| rs7222481  | 17 | GLP2R        | 0.039 | 0.005 | 1.40E-08 | 125.48 |
| rs7240767  | 18 | LAMA1        | 0.039 | 0.007 | 1.60E-08 | 97.04  |
| rs7249758  | 19 | UHRF1        | 0.049 | 0.010 | 3.40E-09 | 72.82  |
| rs72631105 | 10 | WDR11        | 0.058 | 0.010 | 3.70E-09 | 98.14  |
| rs72802342 | 16 | BCAR1        | 0.157 | 0.013 | 4.00E-32 | 264.58 |
| rs72926932 | 18 | TCF4         | 0.086 | 0.012 | 1.00E-14 | 85.99  |
| rs73226260 | 12 | HNF1A        | 0.122 | 0.018 | 5.90E-11 | 45.61  |
| rs738408   | 22 | PNPLA3       | 0.049 | 0.010 | 1.40E-10 | 80.60  |
| rs74452128 | 18 | MC4R         | 0.14  | 0.022 | 1.00E-09 | 33.10  |
| rs74653713 | 3  | MBNL1        | 0.095 | 0.016 | 1.20E-08 | 41.06  |
| rs75253922 | 19 | INSR         | 0.049 | 0.007 | 2.70E-08 | 100.06 |
| rs76263492 | 3  | CACNA2D3     | 0.086 | 0.016 | 6.30E-09 | 41.62  |
| rs7629630  | 3  | EGFEM1P      | 0.049 | 0.010 | 2.50E-08 | 54.80  |
| rs7645517  | 3  | ST6GAL1      | 0.077 | 0.014 | 2.50E-08 | 45.27  |
| rs76549217 | 5  | ANKH         | 0.131 | 0.020 | 3.00E-10 | 47.33  |
| rs7669833  | 4  | TMEM154      | 0.058 | 0.007 | 1.20E-14 | 187.59 |
| rs76895963 | 12 | CCND2        | 0.482 | 0.027 | 1.40E-69 | 319.77 |
| rs77136196 | 6  | HMGA1        | 0.104 | 0.021 | 1.60E-08 | 37.49  |
| rs7719891  | 5  | RASA1        | 0.039 | 0.007 | 2.40E-08 | 79.25  |
| rs77464186 | 11 | CENTD2/ARAP1 | 0.104 | 0.009 | 4.70E-33 | 306.25 |
| rs7756992  | 6  | CDKAL1       | 0.14  | 0.009 | 2.40E-88 | 814.31 |
| rs77864822 | 12 | RMST         | 0.077 | 0.014 | 1.10E-08 | 52.26  |

|                                     |    |                 |       |       |          |         |
|-------------------------------------|----|-----------------|-------|-------|----------|---------|
| rs78020297                          | 16 | FTO             | 0.086 | 0.014 | 6.50E-09 | 47.56   |
| rs78408340                          | 5  | PAM             | 0.385 | 0.038 | 2.10E-24 | 73.20   |
| rs7867635                           | 9  | FOCAD           | 0.039 | 0.007 | 4.00E-08 | 99.64   |
| rs7903146                           | 10 | TCF7L2          | 0.315 | 0.007 | 5.8E-447 | 5677.77 |
| rs79046683                          | 2  | TMEM127         | 0.85  | 0.154 | 3.00E-08 | 2.67    |
| rs7918400                           | 10 | TCF7L2          | 0.058 | 0.007 | 2.00E-15 | 227.41  |
| rs79687284                          | 1  | PROX1           | 0.148 | 0.020 | 2.60E-16 | 60.41   |
| rs7978610                           | 12 | ZNF664          | 0.239 | 0.042 | 2.00E-08 | 570.31  |
| rs7987740                           | 13 | IRS2            | 0.039 | 0.007 | 4.00E-08 | 97.99   |
| rs8010382                           | 14 | SMEK1           | 0.039 | 0.005 | 6.50E-09 | 140.48  |
| rs80147536                          | 2  | THADA           | 0.122 | 0.011 | 2.70E-29 | 230.88  |
| rs8017808                           | 14 | CLEC14A         | 0.039 | 0.007 | 2.10E-08 | 79.25   |
| rs8032939                           | 15 | RASGRP1         | 0.058 | 0.007 | 3.50E-14 | 170.82  |
| rs8046545                           | 16 | ATP2A1          | 0.039 | 0.007 | 1.90E-08 | 94.90   |
| rs8107974                           | 19 | TM6SF2          | 0.095 | 0.012 | 3.30E-15 | 104.93  |
| rs862320                            | 16 | NFAT5           | 0.039 | 0.007 | 3.90E-11 | 100.34  |
| rs878521                            | 7  | GCK             | 0.058 | 0.007 | 1.90E-13 | 170.82  |
| rs917195                            | 7  | CRHR2           | 0.049 | 0.007 | 4.20E-11 | 115.15  |
| rs9379084                           | 6  | RREB1           | 0.104 | 0.012 | 3.30E-21 | 167.28  |
| rs9494624                           | 6  | SLC35D3         | 0.039 | 0.007 | 6.10E-09 | 84.81   |
| rs9505097                           | 6  | RREB1           | 0.049 | 0.010 | 8.60E-10 | 72.82   |
| rs9537803                           | 13 | PCDH17          | 0.039 | 0.007 | 4.60E-08 | 83.03   |
| rs9563615                           | 13 | SRGAP2D         | 0.049 | 0.007 | 6.40E-11 | 133.88  |
| rs963740                            | 13 | DLEU1           | 0.039 | 0.005 | 2.10E-08 | 118.73  |
| rs9687832                           | 5  | ANKRD55         | 0.077 | 0.009 | 1.70E-20 | 199.83  |
| rs9828772                           | 3  | TMCC1           | 0.058 | 0.010 | 4.20E-08 | 57.39   |
| rs9860730                           | 3  | ADAMTS9         | 0.058 | 0.007 | 4.90E-15 | 191.32  |
| rs9873618                           | 3  | SLC2A2          | 0.068 | 0.007 | 4.80E-21 | 257.87  |
| rs9957145                           | 18 | GRP             | 0.049 | 0.010 | 8.10E-09 | 64.22   |
| <b>Fasting<br/>glucose<br/>(35)</b> |    |                 |       |       |          | 47.79   |
| rs10747083                          | 12 | P2RX2           | 0.013 | 0.002 | 7.57E-09 | 13.83   |
| rs10811661                          | 9  | CDKN2B          | 0.024 | 0.003 | 5.65E-18 | 20.67   |
| rs10830963                          | 11 | MTNR1B          | 0.078 | 0.002 | 0.00E+0  | 458.43  |
|                                     |    |                 |       |       | 0        |         |
| rs10885122                          | 10 | ADRA2A          | 0.027 | 0.003 | 6.32E-17 | 18.72   |
| rs11071657                          | 15 | VPS13C/C2CD4A/B | 0.01  | 0.002 | 2.96E-07 | 8.50    |
| rs11558471                          | 8  | SLC30A8         | 0.029 | 0.002 | 7.80E-37 | 66.77   |
| rs11603334                          | 11 | ARAP1           | 0.019 | 0.003 | 1.12E-11 | 12.39   |
| rs11605924                          | 11 | CRY2            | 0.02  | 0.002 | 3.93E-19 | 36.47   |
| rs11619319                          | 13 | PDX1            | 0.019 | 0.002 | 1.33E-15 | 23.32   |
| rs11708067                          | 3  | ADCY5           | 0.023 | 0.003 | 1.30E-18 | 21.34   |

## Supplementary Material

|                     |    |              |       |       |          |              |
|---------------------|----|--------------|-------|-------|----------|--------------|
| rs11715915          | 3  | AMT          | 0.012 | 0.002 | 4.90E-08 | 11.43        |
| rs11920090          | 3  | SLC2A2       | 0.026 | 0.003 | 8.56E-18 | 19.79        |
| rs16913693          | 9  | IKBKAP       | 0.043 | 0.007 | 3.51E-11 | 5.61         |
| rs174550            | 11 | FADS1        | 0.019 | 0.002 | 1.34E-17 | 29.55        |
| rs17762454          | 6  | RREB1        | 0.014 | 0.002 | 9.57E-09 | 13.75        |
| rs2191349           | 7  | DGKB/TMEM195 | 0.029 | 0.002 | 0.00E+0  | 76.45        |
|                     |    |              |       |       | 0        |              |
| rs2657879           | 12 | GLS2         | 0.016 | 0.003 | 3.94E-08 | 9.19         |
| rs340874            | 1  | PROX1        | 0.013 | 0.002 | 4.08E-10 | 15.39        |
| rs3783347           | 14 | WARS         | 0.017 | 0.003 | 1.32E-10 | 11.66        |
| rs3829109           | 9  | LOC728489    | 0.017 | 0.003 | 1.13E-10 | 14.47        |
| rs4506565           | 10 | TCF7L2       | 0.021 | 0.002 | 3.95E-19 | 33.78        |
| rs4607517           | 7  | GCK          | 0.057 | 0.003 | 0.00E+0  | 106.25       |
|                     |    |              |       |       | 0        |              |
| rs4869272           | 5  | PCSK1        | 0.018 | 0.002 | 1.02E-15 | 25.28        |
| rs560887            | 2  | G6PC2        | 0.071 | 0.002 | 0.00E+0  | 387.20       |
|                     |    |              |       |       | 0        |              |
| rs576674            | 13 | KL           | 0.017 | 0.003 | 2.26E-08 | 8.96         |
| rs6072275           | 20 | TOP1         | 0.016 | 0.003 | 1.66E-08 | 8.37         |
| rs6113722           | 20 | FOXA2        | 0.035 | 0.005 | 2.49E-11 | 6.86         |
| rs6943153           | 7  | GRB10        | 0.015 | 0.002 | 1.63E-12 | 18.42        |
| rs7651090           | 3  | IGF2BP2      | 0.013 | 0.002 | 1.75E-08 | 13.18        |
| rs7708285           | 5  | ZBED3        | 0.015 | 0.003 | 1.20E-08 | 10.78        |
| rs780094            | 2  | GCKR         | 0.027 | 0.002 | 2.58E-37 | 63.28        |
| rs7867224           | 9  | GLIS3        | 0.013 | 0.002 | 3.90E-09 | 15.40        |
| rs7944584           | 11 | MADD         | 0.023 | 0.002 | 4.82E-22 | 38.04        |
| rs9368222           | 6  | CDKAL1       | 0.014 | 0.002 | 1.00E-09 | 14.41        |
| rs983309            | 8  | PPP1R3B      | 0.026 | 0.003 | 6.29E-15 | 17.36        |
| <b>Fasting</b>      |    |              |       |       |          | <b>16.52</b> |
| <b>insulin (18)</b> |    |              |       |       |          |              |
| rs10195252          | 2  | GRB14        | 0.016 | 0.003 | 4.87E-10 | 15.06        |
| rs1167800           | 7  | HIP1         | 0.016 | 0.003 | 2.61E-09 | 15.46        |
| rs1421085           | 16 | FTO          | 0.02  | 0.003 | 1.87E-15 | 23.70        |
| rs1530559           | 2  | YSK4         | 0.015 | 0.003 | 3.37E-08 | 13.66        |
| rs17036328          | 3  | PPARG        | 0.021 | 0.003 | 3.59E-12 | 12.91        |
| rs2126259           | 8  | PPP1R3B      | 0.024 | 0.003 | 3.30E-13 | 13.71        |
| rs2745353           | 6  | RSPO3        | 0.014 | 0.002 | 5.48E-09 | 17.87        |
| rs2943645           | 2  | IRS1         | 0.019 | 0.002 | 2.26E-19 | 30.70        |
| rs3822072           | 4  | FAM13A1      | 0.012 | 0.002 | 1.80E-08 | 13.11        |
| rs459193            | 5  | ANKRD55      | 0.015 | 0.002 | 1.15E-10 | 16.18        |
| rs4846565           | 1  | LYPLAL1      | 0.013 | 0.002 | 1.76E-09 | 13.63        |
| rs4865796           | 5  | ARL15        | 0.015 | 0.003 | 2.09E-08 | 12.10        |

|                        |    |                          |        |       |          |        |
|------------------------|----|--------------------------|--------|-------|----------|--------|
| rs6912327              | 6  | C6orf107                 | 0.017  | 0.003 | 2.26E-08 | 11.24  |
| rs731839               | 19 | PEPD                     | 0.015  | 0.003 | 5.13E-12 | 12.28  |
| rs780094               | 2  | GCKR                     | 0.019  | 0.002 | 7.06E-14 | 31.33  |
| rs7903146              | 10 | TCF7L2                   | 0.018  | 0.003 | 6.13E-11 | 15.88  |
| rs860598               | 12 | IGF1                     | 0.018  | 0.003 | 1.64E-08 | 11.12  |
| rs974801               | 4  | TET2                     | 0.014  | 0.002 | 3.27E-11 | 16.84  |
| HbA <sub>1c</sub> (38) |    |                          |        |       |          | 17.71  |
| rs1046896              | 17 | FN3KRP                   | 0.028  | 0.002 | 4.00E-64 | 65.91  |
| rs10774625             | 12 | ATXN2                    | 0.0088 | 0.003 | 1.00E-08 | 3.98   |
| rs10823343             | 10 | HK1                      | 0.0325 | 0.003 | 2.00E-55 | 44.91  |
| rs10830963             | 11 | MTNR1B                   | 0.0196 | 0.002 | 2.00E-23 | 23.23  |
| rs11248914             | 16 | FAM234A                  | 0.0142 | 0.002 | 3.00E-14 | 13.42  |
| rs11558471             | 8  | SLC30A8/LOC1053757<br>16 | 0.015  | 0.002 | 1.00E-19 | 19.19  |
| rs11603334             | 11 | ARAP1                    | 0.012  | 0.021 | 7.00E-09 | 0.62   |
| rs11708067             | 3  | ADCY5                    | 0.0132 | 0.019 | 1.00E-12 | 1.02   |
| rs11964178             | 6  | CCDC162P                 | 0.0096 | 0.016 | 6.00E-10 | 0.85   |
| rs12621844             | 2  | RN7SKP224                | 0.0099 | 0.018 | 2.00E-08 | 0.78   |
| rs13134327             | 4  | FREM3                    | 0.0131 | 0.017 | 3.00E-15 | 1.31   |
| rs1558902              | 16 | FTO                      | 0.0103 | 0.019 | 3.00E-08 | 0.81   |
| rs17509001             | 2  | ATAD2B                   | 0.0181 | 0.002 | 2.00E-15 | 11.29  |
| rs17533903             | 19 | MYO9B                    | 0.015  | 0.002 | 5.00E-12 | 12.06  |
| rs17747324             | 10 | TCF7L2                   | 0.0149 | 0.002 | 6.00E-11 | 10.78  |
| rs1800562              | 6  | HFE/HFE-AS1              | 0.0398 | 0.003 | 5.00E-28 | 22.43  |
| rs198846               | 6  | H1-6                     | 0.0218 | 0.002 | 1.00E-23 | 17.47  |
| rs2110073              | 12 | PHB2                     | 0.0153 | 0.003 | 4.00E-08 | 4.84   |
| rs2383208              | 9  | CDKN2B-AS1               | 0.0142 | 0.002 | 7.00E-12 | 9.43   |
| rs2408955              | 12 | PFKM/SENP1               | 0.0124 | 0.002 | 1.00E-15 | 14.46  |
| rs267738               | 1  | CERS2                    | 0.0111 | 0.019 | 3.00E-09 | 0.69   |
| rs3782123              | 11 | BET1L                    | 0.0126 | 0.020 | 2.00E-10 | 1.03   |
| rs3824065              | 7  | YKT6                     | 0.0192 | 0.002 | 4.00E-35 | 36.09  |
| rs4607517              | 7  | GCK                      | 0.0306 | 0.002 | 9.00E-38 | 39.16  |
| rs4745982              | 10 | HK1                      | 0.0954 | 0.006 | 3.00E-65 | 107.34 |
| rs4820268              | 22 | TMPRSS6                  | 0.0162 | 0.002 | 1.00E-22 | 21.66  |
| rs560887               | 2  | G6PC2                    | 0.0284 | 0.002 | 1.00E-58 | 57.91  |
| rs579459               | 9  | Y_RNA/ABO                | 0.0107 | 0.003 | 9.00E-09 | 3.55   |
| rs592423               | 6  | ATP5B/P6/LINC01625       | 0.0091 | 0.002 | 4.00E-08 | 7.27   |
| rs6474359              | 8  | ANK1                     | 0.0436 | 0.005 | 2.00E-16 | 9.44   |
| rs7040409              | 9  | PCNPP2                   | 0.0284 | 0.004 | 3.00E-14 | 11.74  |
| rs7616006              | 3  | SYN2/GSTM5P1             | 0.0103 | 0.003 | 5.00E-10 | 4.69   |
| rs7756992              | 6  | CDKAL1                   | 0.0123 | 0.002 | 3.00E-12 | 10.27  |
| rs8192675              | 3  | SLC2A2                   | 0.0112 | 0.002 | 1.00E-11 | 9.49   |

|           |    |               |        |       |          |       |
|-----------|----|---------------|--------|-------|----------|-------|
| rs837763  | 16 | LOC107984842  | 0.0172 | 0.002 | 2.00E-28 | 28.40 |
| rs857691  | 1  | SPTA1         | 0.0193 | 0.002 | 4.00E-25 | 24.47 |
| rs9604573 | 13 | GAS6/GAS6-AS1 | 0.0101 | 0.002 | 1.00E-08 | 6.74  |
| rs9914988 | 17 | ERAL1/FAM222B | 0.0131 | 0.002 | 3.00E-11 | 9.86  |

**Table S3** Definition and sources for CVDs in FinnGen.

| CVDs                               | No. of cases | ICD-10 diagnosis for the first occurrence                                  |
|------------------------------------|--------------|----------------------------------------------------------------------------|
| Myocardial infarction              | 4065         | I21, I22                                                                   |
| Heart failure                      | 8016         | I11.0, I13.0, I13.2, I50                                                   |
| Ischemic heart disease             | 10739        | I20-I25                                                                    |
| Coronary atherosclerosis           | 7661         | I24, I25, T82.2, Z95.1                                                     |
| Major coronary heart disease event | 7123         | I20.0, I21, I22; Including revascularizations                              |
| Peripheral artery disease          | 2398         | E10.5, E10.5+I79.2, E11.5, E11.5, I79.2, E12.5, E13.5, E14.5, I70.2, I73.9 |
| Essential hypertension             | 22142        | I10                                                                        |
| Stroke                             | 7144         | I60-I64, G45                                                               |
| Ischaemic stroke                   | 4026         | I63, I64                                                                   |
| Intracerebral haemorrhage          | 1149         | I61                                                                        |
| Atrial fibrillation and fluttering | 7244         | I48                                                                        |
| Cardiovascular mortality           | 3480         | I00-I02, I05-I09, I10-I15, I20-I25, I26-I28, I30-I52, R96, R98, R99        |

**Table S4** The causal effect of genetically predicted type 2 diabetes mellitus on outcomes in different studies.

| ID of outcome      | Outcome                  | Methods  | No. of SNPs | Beta  | SE    | $p$ value | OR    | LCI   | UCI   | Heterogeneity $p$ value | $p$ value for intercept | $p$ value for MR-PRESSO | Distortion test $p$ value |
|--------------------|--------------------------|----------|-------------|-------|-------|-----------|-------|-------|-------|-------------------------|-------------------------|-------------------------|---------------------------|
| ukb-d-19_K_CARDIAC | Cardiovascular mortality | MR Egger | 273         | 0.000 | 0.000 | 0.130     | 1.000 | 1.000 | 1.000 | 0.367                   | 0.399                   | 0.379                   |                           |

|                            |                          |                           |     |        |       |              |       |       |       |       |       |        |       |
|----------------------------|--------------------------|---------------------------|-----|--------|-------|--------------|-------|-------|-------|-------|-------|--------|-------|
|                            |                          | Weighted median           | 273 | 0.00   | 0.00  | <b>0.017</b> | 1.00  | 1.00  | 1.00  |       |       |        |       |
|                            |                          | Inverse variance weighted | 273 | 0.00   | 0.00  | <b>0.000</b> | 1.00  | 1.00  | 1.00  | 0.372 |       |        |       |
|                            |                          | Simple mode               | 273 | 0.00   | 0.00  | <b>0.038</b> | 1.00  | 1.00  | 1.00  |       |       |        |       |
|                            |                          | Weighted mode             | 273 | 0.00   | 0.00  | 0.055        | 1.00  | 1.00  | 1.00  |       |       |        |       |
|                            |                          | MR-PRESSO                 | 273 | 0.00   | 0.00  | <b>0.000</b> | 1.00  | 1.00  | 1.00  |       |       |        |       |
| <b>ieu-a-798</b>           | Myocardial infarction    | MR Egger                  | 268 | 0.02   | 0.03  | 0.485        | 1.02  | 0.96  | 1.08  | 0.000 | 0.000 | <0.001 | 0.687 |
|                            |                          | Weighted median           | 268 | 0.079  | 0.024 | <b>0.001</b> | 1.083 | 1.032 | 1.135 |       |       |        |       |
|                            |                          | Inverse variance weighted | 268 | 0.118  | 0.016 | <b>0.000</b> | 1.126 | 1.092 | 1.161 | 0.000 |       |        |       |
|                            |                          | Simple mode               | 268 | 0.095  | 0.055 | 0.087        | 1.099 | 0.987 | 1.225 |       |       |        |       |
|                            |                          | Weighted mode             | 268 | 0.069  | 0.025 | <b>0.007</b> | 1.071 | 1.019 | 1.125 |       |       |        |       |
|                            |                          | MR-PRESSO                 | 268 | 0.120  | 0.016 | <b>0.000</b> | 1.127 | 1.094 | 1.162 |       |       |        |       |
| <b>ukb-d-I9_INTRACRA A</b> | Intracranial haemorrhage | MR Egger                  | 271 | 0.00   | 0.00  | 0.213        | 1.000 | 0.999 | 1.000 | 0.099 | 0.065 | 0.121  |       |
|                            |                          | Weighted median           | 271 | 0.000  | 0.000 | 0.860        | 1.000 | 0.999 | 1.001 |       |       |        |       |
|                            |                          | Inverse variance weighted | 271 | -0.001 | 0.001 | 0.172        | 0.999 | 0.998 | 1.000 | 0.081 |       |        |       |
|                            |                          | Simple mode               | 271 | 0.000  | 0.000 | 0.493        | 1.000 | 1.000 | 1.000 |       |       |        |       |
|                            |                          | Weighted mode             | 271 | 0.000  | 0.000 | 0.177        | 1.000 | 0.999 | 1.000 |       |       |        |       |
|                            |                          | MR-PRESSO                 | 271 | 0.000  | 0.000 | 0.489        | 1.000 | 1.000 | 1.000 |       |       |        |       |
| <b>ebi-a-GCST009541</b>    | Heart failure            | MR Egger                  | 232 | -0.014 | 0.025 | 0.578        | 0.986 | 0.939 | 1.036 | 0.000 | 0.001 | <0.001 | 0.511 |
|                            |                          | Weighted median           | 232 | 0.014  | 0.019 | 0.458        | 1.014 | 0.977 | 1.053 |       |       |        |       |
|                            |                          | Inverse variance weighted | 232 | 0.059  | 0.013 | <b>0.000</b> | 1.061 | 1.035 | 1.088 | 0.000 |       |        |       |
|                            |                          | Simple mode               | 232 | 0.065  | 0.044 | 0.141        | 1.067 | 0.979 | 1.163 |       |       |        |       |
|                            |                          | Weighted mode             | 232 | 0.014  | 0.019 | 0.464        | 1.014 | 0.977 | 1.054 |       |       |        |       |
|                            |                          | MR-PRESSO                 | 232 | 0.066  | 0.011 | <b>0.000</b> | 1.068 | 1.045 | 1.092 |       |       |        |       |

Supplementary Material

|                           |                                    |                           |     |           |           |                         |           |           |           |       |       |        |       |
|---------------------------|------------------------------------|---------------------------|-----|-----------|-----------|-------------------------|-----------|-----------|-----------|-------|-------|--------|-------|
| <b>ieu-a-7</b>            | Ischemic heart disease             | MR Egger                  | 269 | 0.03<br>1 | 0.02<br>8 | 0.27<br>6               | 1.03<br>1 | 0.97<br>6 | 1.09<br>0 | 0.000 | 0.000 | <0.001 | 0.586 |
|                           |                                    | Weighted median           | 269 | 0.10<br>6 | 0.02<br>3 | <b>0.00</b><br><b>0</b> | 1.11<br>1 | 1.06<br>3 | 1.16<br>2 |       |       |        |       |
|                           |                                    | Inverse variance weighted | 269 | 0.12<br>8 | 0.01<br>5 | <b>0.00</b><br><b>0</b> | 1.13<br>7 | 1.10<br>5 | 1.17<br>0 | 0.000 |       |        |       |
|                           |                                    | Simple mode               | 269 | 0.17<br>9 | 0.05<br>1 | <b>0.00</b><br><b>1</b> | 1.19<br>6 | 1.08<br>2 | 1.32<br>3 |       |       |        |       |
|                           |                                    | Weighted mode             | 269 | 0.09<br>7 | 0.02<br>6 | <b>0.00</b><br><b>0</b> | 1.10<br>2 | 1.04<br>6 | 1.16<br>1 |       |       |        |       |
| <b>ukb-d-I9_CORATHERR</b> | Coronary atherosclerosis           | MR Egger                  | 277 | 0.00<br>3 | 0.00<br>1 | <b>0.00</b><br><b>8</b> | 1.00<br>3 | 1.00<br>1 | 1.00<br>6 | 0.000 | 0.096 | <0.001 | 0.762 |
|                           |                                    | Weighted median           | 277 | 0.00<br>5 | 0.00<br>1 | <b>0.00</b><br><b>0</b> | 1.00<br>5 | 1.00<br>4 | 1.00<br>7 |       |       |        |       |
|                           |                                    | Inverse variance weighted | 277 | 0.00<br>5 | 0.00<br>1 | <b>0.00</b><br><b>0</b> | 1.00<br>5 | 1.00<br>4 | 1.00<br>7 | 0.000 |       |        |       |
|                           |                                    | Simple mode               | 277 | 0.00<br>8 | 0.00<br>3 | <b>0.00</b><br><b>2</b> | 1.00<br>8 | 1.00<br>3 | 1.01<br>3 |       |       |        |       |
|                           |                                    | Weighted mode             | 277 | 0.00<br>4 | 0.00<br>1 | <b>0.00</b><br><b>0</b> | 1.00<br>4 | 1.00<br>2 | 1.00<br>6 |       |       |        |       |
| <b>ukb-d-I9_CHD</b>       | Major coronary heart disease event | MR Egger                  | 276 | 0.00<br>2 | 0.00<br>1 | 0.10<br>1               | 1.00<br>2 | 1.00<br>0 | 1.00<br>4 | 0.000 | 0.047 | <0.001 | 0.96  |
|                           |                                    | Weighted median           | 276 | 0.00<br>3 | 0.00<br>1 | <b>0.00</b><br><b>0</b> | 1.00<br>3 | 1.00<br>2 | 1.00<br>5 |       |       |        |       |
|                           |                                    | Inverse variance weighted | 276 | 0.00<br>3 | 0.00<br>1 | <b>0.00</b><br><b>0</b> | 1.00<br>3 | 1.00<br>2 | 1.00<br>4 | 0.000 |       |        |       |
|                           |                                    | Simple mode               | 276 | 0.00<br>3 | 0.00<br>2 | 0.12<br>5               | 1.00<br>3 | 0.99<br>9 | 1.00<br>6 |       |       |        |       |
|                           |                                    | Weighted mode             | 276 | 0.00<br>3 | 0.00<br>1 | <b>0.00</b><br><b>0</b> | 1.00<br>3 | 1.00<br>1 | 1.00<br>4 |       |       |        |       |
| <b>bbj-a-144</b>          | Peripheral artery disease          | MR Egger                  | 217 | 0.12<br>0 | 0.05<br>1 | <b>0.02</b><br><b>0</b> | 1.12<br>8 | 1.02<br>0 | 1.24<br>7 | 0.059 | 0.075 | 0.039  | NA*   |
|                           |                                    | Weighted median           | 217 | 0.11<br>5 | 0.05<br>3 | <b>0.03</b><br><b>0</b> | 1.12<br>2 | 1.01<br>1 | 1.24<br>5 |       |       |        |       |
|                           |                                    | Inverse variance weighted | 217 | 0.19<br>5 | 0.03<br>0 | <b>0.00</b><br><b>0</b> | 1.21<br>5 | 1.14<br>5 | 1.28<br>9 | 0.047 |       |        |       |
|                           |                                    | Simple mode               | 217 | 0.12<br>3 | 0.05<br>2 | 0.02<br>5               | 1.12<br>3 | 1.02<br>9 | 1.24<br>6 |       |       |        |       |
|                           |                                    | Weighted mode             | 217 | 0.11<br>3 | 0.05<br>1 | <b>0.03</b><br><b>0</b> | 1.12<br>3 | 1.01<br>1 | 1.24<br>4 |       |       |        |       |



|                         |                                    |                           |     |        |       |              |       |       |       |       |       |        |       |
|-------------------------|------------------------------------|---------------------------|-----|--------|-------|--------------|-------|-------|-------|-------|-------|--------|-------|
|                         |                                    | Simple mode               | 217 | 0.099  | 0.110 | 0.366        | 1.105 | 0.891 | 1.370 |       |       |        |       |
|                         |                                    | Weighted mode             | 217 | 0.099  | 0.054 | 0.069        | 1.105 | 0.993 | 1.229 |       |       |        |       |
|                         |                                    | MR-PRESSO                 | 217 | 0.190  | 0.029 | <b>0.000</b> | 1.209 | 1.141 | 1.280 |       |       |        |       |
| <b>ukb-b-12493</b>      | Essential hypertension             | MR Egger                  | 276 | 0.002  | 0.002 | 0.431        | 1.002 | 0.997 | 1.006 | 0.000 | 0.000 | <0.001 | 0.953 |
|                         |                                    | Weighted median           | 276 | 0.006  | 0.002 | <b>0.000</b> | 1.006 | 1.003 | 1.009 |       |       |        |       |
|                         |                                    | Inverse variance weighted | 276 | 0.012  | 0.001 | <b>0.000</b> | 1.012 | 1.010 | 1.014 | 0.000 |       |        |       |
|                         |                                    | Simple mode               | 276 | 0.006  | 0.004 | 0.122        | 1.006 | 0.998 | 1.014 |       |       |        |       |
|                         |                                    | Weighted mode             | 276 | 0.005  | 0.001 | <b>0.000</b> | 1.005 | 1.003 | 1.008 |       |       |        |       |
|                         |                                    | MR-PRESSO                 | 276 | 0.012  | 0.001 | <b>0.000</b> | 1.012 | 1.010 | 1.014 |       |       |        |       |
| <b>ebi-a-GCST006906</b> | Stroke                             | MR Egger                  | 268 | 0.050  | 0.023 | <b>0.033</b> | 1.051 | 1.004 | 1.100 | 0.000 | 0.224 | 0.001  | 0.619 |
|                         |                                    | Weighted median           | 268 | 0.049  | 0.008 | <b>0.006</b> | 1.050 | 1.014 | 1.087 |       |       |        |       |
|                         |                                    | Inverse variance weighted | 268 | 0.074  | 0.012 | <b>0.000</b> | 1.077 | 1.052 | 1.102 | 0.000 |       |        |       |
|                         |                                    | Simple mode               | 268 | 0.047  | 0.041 | 0.247        | 1.048 | 0.968 | 1.136 |       |       |        |       |
|                         |                                    | Weighted mode             | 268 | 0.051  | 0.020 | <b>0.013</b> | 1.052 | 1.011 | 1.095 |       |       |        |       |
|                         |                                    | MR-PRESSO                 | 268 | 0.074  | 0.011 | <b>0.000</b> | 1.077 | 1.053 | 1.101 |       |       |        |       |
| <b>ebi-a-GCST006908</b> | Ischemic stroke                    | MR Egger                  | 269 | 0.063  | 0.024 | <b>0.010</b> | 1.065 | 1.015 | 1.118 | 0.001 | 0.337 | 0.005  | 0.88  |
|                         |                                    | Weighted median           | 269 | 0.067  | 0.020 | <b>0.001</b> | 1.069 | 1.028 | 1.112 |       |       |        |       |
|                         |                                    | Inverse variance weighted | 269 | 0.084  | 0.012 | <b>0.000</b> | 1.087 | 1.061 | 1.114 | 0.001 |       |        |       |
|                         |                                    | Simple mode               | 269 | 0.063  | 0.051 | 0.212        | 1.065 | 0.965 | 1.176 |       |       |        |       |
|                         |                                    | Weighted mode             | 269 | 0.067  | 0.022 | <b>0.002</b> | 1.069 | 1.024 | 1.116 |       |       |        |       |
|                         |                                    | MR-PRESSO                 | 269 | 0.083  | 0.012 | <b>0.000</b> | 1.087 | 1.061 | 1.112 |       |       |        |       |
| <b>ebi-a-GCST006414</b> | Atrial fibrillation and fluttering | MR Egger                  | 283 | -0.008 | 0.022 | 0.715        | 0.992 | 0.949 | 1.036 | 0.000 | 0.172 | <0.001 | 0.097 |
|                         |                                    | Weighted median           | 283 | -0.022 | 0.015 | 0.147        | 0.978 | 0.950 | 1.008 |       |       |        |       |

Supplementary Material

|                         |                 |                           |     |        |       |              |       |       |       |       |       |        |       |
|-------------------------|-----------------|---------------------------|-----|--------|-------|--------------|-------|-------|-------|-------|-------|--------|-------|
|                         |                 | Inverse variance weighted | 283 | 0.018  | 0.012 | 0.117        | 1.018 | 0.995 | 1.042 | 0.000 |       |        |       |
|                         |                 | Simple mode               | 283 | -0.050 | 0.044 | 0.253        | 0.951 | 0.873 | 1.036 |       |       |        |       |
|                         |                 | Weighted mode             | 283 | -0.039 | 0.018 | <b>0.027</b> | 0.962 | 0.929 | 0.995 |       |       |        |       |
|                         |                 | MR-PRESSO                 | 283 | 0.018  | 0.011 | 0.121        | 1.018 | 0.995 | 1.041 |       |       |        |       |
| <b>ukb-d-30760_irnt</b> | HDL cholesterol | MR Egger                  | 277 | -0.016 | 0.008 | 0.051        | 0.985 | 0.969 | 1.000 | 0.000 | 0.010 | <0.001 | 0.106 |
|                         |                 | Weighted median           | 277 | -0.013 | 0.002 | <b>0.000</b> | 0.987 | 0.983 | 0.991 |       |       |        |       |
|                         |                 | Inverse variance weighted | 277 | -0.033 | 0.004 | <b>0.000</b> | 0.967 | 0.960 | 0.975 | 0.000 |       |        |       |
|                         |                 | Simple mode               | 277 | -0.012 | 0.006 | <b>0.049</b> | 0.988 | 0.977 | 1.000 |       |       |        |       |
|                         |                 | Weighted mode             | 277 | -0.009 | 0.002 | <b>0.000</b> | 0.991 | 0.987 | 0.995 |       |       |        |       |
|                         |                 | MR-PRESSO                 | 277 | -0.034 | 0.004 | <b>0.000</b> | 0.967 | 0.959 | 0.974 |       |       |        |       |
| <b>ukb-d-30780_irnt</b> | LDL cholesterol | MR Egger                  | 277 | -0.019 | 0.019 | 0.327        | 0.982 | 0.946 | 1.019 | 0.000 | 0.690 | <0.001 | 0.013 |
|                         |                 | Weighted median           | 277 | -0.015 | 0.004 | <b>0.000</b> | 0.985 | 0.977 | 0.993 |       |       |        |       |
|                         |                 | Inverse variance weighted | 277 | -0.025 | 0.000 | <b>0.010</b> | 0.975 | 0.957 | 0.994 | 0.000 |       |        |       |
|                         |                 | Simple mode               | 277 | -0.017 | 0.012 | 0.172        | 0.983 | 0.960 | 1.007 |       |       |        |       |
|                         |                 | Weighted mode             | 277 | -0.017 | 0.006 | <b>0.006</b> | 0.983 | 0.972 | 0.995 |       |       |        |       |
|                         |                 | MR-PRESSO                 | 277 | -0.034 | 0.004 | <b>0.000</b> | 0.967 | 0.959 | 0.974 |       |       |        |       |
| <b>ukb-d-30870_irnt</b> | Triglycerides   | MR Egger                  | 277 | 0.043  | 0.026 | 0.098        | 1.044 | 0.992 | 1.097 | 0.000 | 0.091 | <0.001 | 0.118 |
|                         |                 | Weighted median           | 277 | 0.052  | 0.006 | <b>0.000</b> | 1.054 | 1.041 | 1.067 |       |       |        |       |
|                         |                 | Inverse variance weighted | 277 | 0.080  | 0.013 | <b>0.000</b> | 1.083 | 1.056 | 1.112 | 0.000 |       |        |       |
|                         |                 | Simple mode               | 277 | 0.059  | 0.013 | <b>0.000</b> | 1.060 | 1.033 | 1.088 |       |       |        |       |

|                         |                  |                           |     |        |       |              |       |       |       |       |       |        |        |
|-------------------------|------------------|---------------------------|-----|--------|-------|--------------|-------|-------|-------|-------|-------|--------|--------|
|                         |                  | Weighted mode             | 277 | 0.042  | 0.007 | <b>0.000</b> | 1.043 | 1.029 | 1.057 |       |       |        |        |
|                         |                  | MR-PRESSO                 | 277 | 0.082  | 0.013 | <b>0.000</b> | 1.086 | 1.058 | 1.114 |       |       |        |        |
| <b>ukb-d-30630_irnt</b> | Apolipoprotein A | MR Egger                  | 277 | -0.008 | 0.005 | 0.137        | 0.992 | 0.982 | 1.002 | 0.000 | 0.021 | <0.001 | <0.001 |
|                         |                  | Weighted median           | 277 | -0.006 | 0.001 | <b>0.000</b> | 0.994 | 0.992 | 0.997 |       |       |        |        |
|                         |                  | Inverse variance weighted | 277 | -0.018 | 0.003 | <b>0.000</b> | 0.982 | 0.977 | 0.987 | 0.000 |       |        |        |
|                         |                  | Simple mode               | 277 | -0.006 | 0.003 | 0.107        | 0.994 | 0.988 | 1.001 |       |       |        |        |
|                         |                  | Weighted mode             | 277 | -0.006 | 0.002 | <b>0.002</b> | 0.994 | 0.991 | 0.998 |       |       |        |        |
|                         |                  | MR-PRESSO                 | 277 | -0.018 | 0.003 | <b>0.000</b> | 0.982 | 0.977 | 0.987 |       |       |        |        |
| <b>ukb-d-30640_irnt</b> | Apolipoprotein B | MR Egger                  | 277 | -0.004 | 0.006 | 0.560        | 0.996 | 0.984 | 1.009 | 0.000 | 0.879 | <0.001 | 0.081  |
|                         |                  | Weighted median           | 277 | -0.001 | 0.002 | 0.524        | 0.999 | 0.996 | 1.002 |       |       |        |        |
|                         |                  | Inverse variance weighted | 277 | -0.003 | 0.003 | 0.377        | 0.997 | 0.991 | 1.004 | 0.000 |       |        |        |
|                         |                  | Simple mode               | 277 | -0.006 | 0.004 | 0.188        | 0.994 | 0.986 | 1.003 |       |       |        |        |
|                         |                  | Weighted mode             | 277 | -0.006 | 0.002 | <b>0.002</b> | 0.994 | 0.991 | 0.998 |       |       |        |        |
|                         |                  | MR-PRESSO                 | 277 | -0.003 | 0.003 | 0.416        | 0.997 | 0.991 | 1.004 |       |       |        |        |
| <b>ukb-d-30790_irnt</b> | Lipoprotein A    | MR Egger                  | 277 | -0.030 | 0.029 | 0.299        | 0.971 | 0.917 | 1.027 | 0.000 | 0.215 | <0.001 | 0.456  |
|                         |                  | Weighted median           | 277 | -0.010 | 0.005 | 0.056        | 0.990 | 0.980 | 1.000 |       |       |        |        |
|                         |                  | Inverse variance weighted | 277 | 0.001  | 0.015 | 0.961        | 1.001 | 0.972 | 1.030 | 0.000 |       |        |        |
|                         |                  | Simple mode               | 277 | -0.003 | 0.001 | 0.776        | 0.997 | 0.975 | 1.019 |       |       |        |        |
|                         |                  | Weighted mode             | 277 | -0.003 | 0.006 | 0.606        | 0.997 | 0.985 | 1.009 |       |       |        |        |
|                         |                  | MR-PRESSO                 | 277 | 0.000  | 0.014 | 0.976        | 1.000 | 0.973 | 1.029 |       |       |        |        |

FinnGen Study

Supplementary Material

|                             |                          |                           |                       |                 |           |                         |           |                         |           |           |           |       |       |       |       |
|-----------------------------|--------------------------|---------------------------|-----------------------|-----------------|-----------|-------------------------|-----------|-------------------------|-----------|-----------|-----------|-------|-------|-------|-------|
| <b>finn-a-I9_K_CARDIA C</b> | Cardiovascular mortality | MR Egger                  | 231                   | 0.03<br>4       | 0.04<br>2 | 0.42<br>2               | 1.03<br>5 | 0.95<br>2               | 1.12<br>5 | 0.142     | 0.546     | 0.022 | NA*   |       |       |
|                             |                          | Weighted median           | 231                   | 0.06<br>2       | 0.03<br>7 | 0.09<br>1               | 1.06<br>4 | 0.99<br>0               | 1.14<br>3 |           |           |       |       |       |       |
|                             |                          | Inverse variance weighted | 231                   | 0.05<br>6       | 0.02<br>2 | <b>0.01</b><br><b>1</b> | 1.05<br>8 | 1.01<br>3               | 1.10<br>4 | 0.148     |           |       |       |       |       |
|                             |                          | Simple mode               | 231                   | 0.01<br>4       | 0.07<br>7 | 0.86<br>1               | 1.01<br>4 | 0.87<br>1               | 1.17<br>9 |           |           |       |       |       |       |
|                             |                          | Weighted mode             | 231                   | 0.05<br>3       | 0.03<br>8 | 0.16<br>9               | 1.05<br>4 | 0.97<br>8               | 1.13<br>7 |           |           |       |       |       |       |
|                             |                          | MR-PRESSO                 | 231                   | 0.05<br>8       | 0.02<br>1 | <b>0.00</b><br><b>5</b> | 1.06<br>0 | 1.01<br>8               | 1.10<br>4 |           |           |       |       |       |       |
|                             |                          | <b>finn-a-I9_MI</b>       | Myocardial infarction | MR Egger        | 231       | 0.10<br>2               | 0.04<br>2 | <b>0.01</b><br><b>6</b> | 1.10<br>8 | 1.02<br>0 | 1.20<br>3 | 0.000 | 0.383 | 0.016 | NA*   |
|                             |                          |                           |                       | Weighted median | 231       | 0.09<br>6               | 0.03<br>1 | <b>0.00</b><br><b>2</b> | 1.10<br>1 | 1.03<br>6 | 1.17<br>1 |       |       |       |       |
|                             |                          | Inverse variance weighted | 231                   | 0.13<br>4       | 0.02<br>2 | <b>0.00</b><br><b>0</b> | 1.14<br>3 | 1.09<br>5               | 1.19<br>3 | 0.000     |           |       |       |       |       |
|                             |                          | Simple mode               | 231                   | 0.15<br>4       | 0.07<br>6 | <b>0.04</b><br><b>4</b> | 1.16<br>7 | 1.00<br>5               | 1.35<br>5 |           |           |       |       |       |       |
|                             |                          | Weighted mode             | 231                   | 0.11<br>1       | 0.03<br>1 | <b>0.00</b><br><b>0</b> | 1.11<br>7 | 1.05<br>2               | 1.18<br>7 |           |           |       |       |       |       |
|                             |                          | MR-PRESSO                 | 231                   | -<br>0.09<br>1  | 0.08<br>5 | 0.29<br>5               | 0.91<br>3 | 0.77<br>3               | 1.08<br>0 |           |           |       |       |       |       |
| <b>finn-a-I9_ICH</b>        | Intracerebral hemorrhage | MR Egger                  | 231                   | 0.01<br>6       | 0.06<br>0 | 0.79<br>0               | 1.01<br>6 | 0.90<br>3               | 1.14<br>3 | 0.945     | 0.232     | 0.113 |       |       |       |
|                             |                          | Weighted median           | 231                   | 0.11<br>1       | 0.05<br>4 | <b>0.04</b><br><b>1</b> | 1.11<br>7 | 1.00<br>4               | 1.24<br>3 |           |           |       |       |       |       |
|                             |                          | Inverse variance weighted | 231                   | 0.07<br>8       | 0.03<br>1 | <b>0.01</b><br><b>3</b> | 1.08<br>1 | 1.01<br>6               | 1.14<br>9 | 0.942     |           |       |       |       |       |
|                             |                          | Simple mode               | 231                   | 0.26<br>2       | 0.12<br>3 | <b>0.03</b><br><b>5</b> | 1.29<br>9 | 1.02<br>1               | 1.65<br>3 |           |           |       |       |       |       |
|                             |                          | Weighted mode             | 231                   | 0.10<br>0       | 0.06<br>4 | 0.12<br>2               | 1.10<br>5 | 0.97<br>4               | 1.25<br>4 |           |           |       |       |       |       |
|                             |                          | MR-PRESSO                 | 231                   | 0.08<br>9       | 0.10<br>0 | 0.37<br>3               | 1.09<br>4 | 0.89<br>9               | 1.33<br>0 |           |           |       |       |       |       |
|                             |                          | <b>finn-a-HEARTFAIL</b>   | Heart failure         | MR Egger        | 231       | -<br>0.03<br>8          | 0.03<br>6 | 0.29<br>2               | 0.96<br>2 | 0.89<br>6 | 1.03<br>3 | 0.001 | 0.040 | 0.003 | 0.224 |
|                             |                          |                           |                       | Weighted median | 231       | -<br>0.01<br>1          | 0.02<br>9 | 0.71<br>1               | 0.98<br>9 | 0.93<br>5 | 1.04<br>7 |       |       |       |       |
|                             |                          | Inverse variance weighted | 231                   | 0.02<br>6       | 0.01<br>9 | 0.17<br>8               | 1.02<br>6 | 0.98<br>8               | 1.06<br>5 | 0.000     |           |       |       |       |       |
|                             |                          | Simple mode               | 231                   | 0.16<br>6       | 0.06<br>9 | <b>0.01</b><br><b>8</b> | 1.18<br>1 | 1.03<br>0               | 1.35<br>3 |           |           |       |       |       |       |

|                            |                                    |                           |     |        |       |              |       |       |       |       |       |       |
|----------------------------|------------------------------------|---------------------------|-----|--------|-------|--------------|-------|-------|-------|-------|-------|-------|
|                            |                                    | Weighted mode             | 231 | -0.021 | 0.032 | 0.516        | 0.979 | 0.920 | 1.043 |       |       |       |
|                            |                                    | MR-PRESSO                 | 231 | 0.048  | 0.037 | 0.203        | 1.049 | 0.975 | 1.129 |       |       |       |
| <b>finn-a-I9_ISCHHEART</b> | Ischemic heart disease             | MR Egger                  | 231 | 0.106  | 0.032 | <b>0.001</b> | 1.112 | 1.045 | 1.183 | 0.000 | 0.784 | 0.051 |
|                            |                                    | Weighted median           | 231 | 0.094  | 0.023 | <b>0.000</b> | 1.099 | 1.050 | 1.150 |       |       |       |
|                            |                                    | Inverse variance weighted | 231 | 0.114  | 0.016 | <b>0.000</b> | 1.120 | 1.085 | 1.157 | 0.000 |       |       |
|                            |                                    | Simple mode               | 231 | 0.067  | 0.052 | 0.197        | 1.069 | 0.966 | 1.183 |       |       |       |
|                            |                                    | Weighted mode             | 231 | 0.083  | 0.024 | <b>0.001</b> | 1.086 | 1.036 | 1.138 |       |       |       |
|                            |                                    | MR-PRESSO                 | 231 | 0.114  | 0.031 | <b>0.000</b> | 1.121 | 1.054 | 1.192 |       |       |       |
| <b>finn-a-I9_CORATHERR</b> | Coronary atherosclerosis           | MR Egger                  | 231 | 0.088  | 0.036 | <b>0.016</b> | 1.092 | 1.017 | 1.173 | 0.000 | 0.328 | 0.062 |
|                            |                                    | Weighted median           | 231 | 0.078  | 0.027 | <b>0.003</b> | 1.082 | 1.026 | 1.140 |       |       |       |
|                            |                                    | Inverse variance weighted | 231 | 0.118  | 0.019 | <b>0.000</b> | 1.126 | 1.085 | 1.168 | 0.000 |       |       |
|                            |                                    | Simple mode               | 231 | 0.101  | 0.062 | 0.104        | 1.106 | 0.980 | 1.248 |       |       |       |
|                            |                                    | Weighted mode             | 231 | 0.076  | 0.028 | <b>0.007</b> | 1.079 | 1.021 | 1.141 |       |       |       |
|                            |                                    | MR-PRESSO                 | 231 | 0.128  | 0.036 | <b>0.001</b> | 1.136 | 1.058 | 1.220 |       |       |       |
| <b>finn-a-I9_CHD</b>       | Major coronary heart disease event | MR Egger                  | 231 | 0.082  | 0.037 | <b>0.029</b> | 1.085 | 1.009 | 1.168 | 0.000 | 0.509 | 0.130 |
|                            |                                    | Weighted median           | 231 | 0.123  | 0.026 | <b>0.000</b> | 1.131 | 1.074 | 1.191 |       |       |       |
|                            |                                    | Inverse variance weighted | 231 | 0.103  | 0.019 | <b>0.000</b> | 1.109 | 1.067 | 1.152 | 0.000 |       |       |
|                            |                                    | Simple mode               | 231 | 0.196  | 0.066 | <b>0.003</b> | 1.216 | 1.069 | 1.383 |       |       |       |
|                            |                                    | Weighted mode             | 231 | 0.108  | 0.031 | <b>0.001</b> | 1.114 | 1.048 | 1.184 |       |       |       |
|                            |                                    | MR-PRESSO                 | 231 | 0.082  | 0.036 | <b>0.023</b> | 1.086 | 1.012 | 1.164 |       |       |       |
| <b>finn-a-I9_PAD</b>       | Peripheral artery disease          | MR Egger                  | 231 | 0.113  | 0.049 | <b>0.022</b> | 1.120 | 1.017 | 1.232 | 0.000 | 0.093 | 0.073 |
|                            |                                    | Weighted median           | 231 | 0.165  | 0.036 | <b>0.000</b> | 1.180 | 1.099 | 1.266 |       |       |       |

|                              |                        |                           |     |                |           |                         |           |           |           |       |       |        |       |
|------------------------------|------------------------|---------------------------|-----|----------------|-----------|-------------------------|-----------|-----------|-----------|-------|-------|--------|-------|
|                              |                        | Inverse variance weighted | 231 | 0.18<br>3      | 0.02<br>6 | <b>0.00</b><br><b>0</b> | 1.20<br>1 | 1.14<br>3 | 1.26<br>3 | 0.000 |       |        |       |
|                              |                        | Simple mode               | 231 | 0.10<br>5      | 0.08<br>8 | 0.23<br>1               | 1.11<br>1 | 0.93<br>5 | 1.32<br>0 |       |       |        |       |
|                              |                        | Weighted mode             | 231 | 0.13<br>4      | 0.03<br>7 | <b>0.00</b><br><b>0</b> | 1.14<br>3 | 1.06<br>3 | 1.23<br>0 |       |       |        |       |
|                              |                        | MR-PRESSO                 | 231 | 0.15<br>7      | 0.05<br>6 | <b>0.00</b><br><b>6</b> | 1.16<br>9 | 1.04<br>7 | 1.30<br>6 |       |       |        |       |
| <b>finn-a-I9_HYPTENSE SS</b> | Essential hypertension | MR Egger                  | 231 | 0.02<br>5      | 0.03<br>0 | 0.40<br>2               | 1.02<br>6 | 0.96<br>7 | 1.08<br>8 | 0.000 | 0.000 | <0.001 | 0.842 |
|                              |                        | Weighted median           | 231 | 0.06<br>3      | 0.02<br>3 | <b>0.00</b><br><b>6</b> | 1.06<br>5 | 1.01<br>8 | 1.11<br>4 |       |       |        |       |
|                              |                        | Inverse variance weighted | 231 | 0.12<br>2      | 0.01<br>6 | <b>0.00</b><br><b>0</b> | 1.13<br>0 | 1.09<br>5 | 1.16<br>6 | 0.000 |       |        |       |
|                              |                        | Simple mode               | 231 | 0.02<br>3      | 0.05<br>8 | 0.69<br>2               | 1.02<br>3 | 0.91<br>3 | 1.14<br>7 |       |       |        |       |
|                              |                        | Weighted mode             | 231 | 0.01<br>7      | 0.02<br>0 | 0.39<br>7               | 1.01<br>7 | 0.97<br>8 | 1.05<br>9 |       |       |        |       |
|                              |                        | MR-PRESSO                 | 231 | 0.05<br>9      | 0.03<br>1 | 0.05<br>8               | 1.06<br>1 | 0.99<br>9 | 1.12<br>6 |       |       |        |       |
| <b>finn-a-C_STROKE</b>       | Stroke                 | MR Egger                  | 231 | 0.04<br>9      | 0.02<br>9 | 0.09<br>1               | 1.05<br>0 | 0.99<br>2 | 1.11<br>1 | 0.134 | 0.044 | 0.788  |       |
|                              |                        | Weighted median           | 231 | 0.09<br>5      | 0.02<br>5 | <b>0.00</b><br><b>0</b> | 1.10<br>0 | 1.04<br>7 | 1.15<br>6 |       |       |        |       |
|                              |                        | Inverse variance weighted | 231 | 0.09<br>9      | 0.01<br>5 | <b>0.00</b><br><b>0</b> | 1.10<br>4 | 1.07<br>1 | 1.13<br>7 | 0.105 |       |        |       |
|                              |                        | Simple mode               | 231 | 0.08<br>6      | 0.05<br>7 | 0.13<br>5               | 1.09<br>0 | 0.97<br>4 | 1.21<br>9 |       |       |        |       |
|                              |                        | Weighted mode             | 231 | 0.11<br>2      | 0.03<br>4 | <b>0.00</b><br><b>1</b> | 1.11<br>9 | 1.04<br>7 | 1.19<br>6 |       |       |        |       |
|                              |                        | MR-PRESSO                 | 231 | 0.05<br>6      | 0.03<br>1 | 0.07<br>0               | 1.05<br>8 | 0.99<br>6 | 1.12<br>3 |       |       |        |       |
| <b>finn-a-I9_STR_EXH</b>     | Ischemic stroke        | MR Egger                  | 231 | 0.03<br>3      | 0.03<br>4 | 0.34<br>6               | 1.03<br>3 | 0.96<br>6 | 1.10<br>5 | 0.139 | 0.306 | 0.404  |       |
|                              |                        | Weighted median           | 231 | 0.07<br>8      | 0.03<br>0 | <b>0.00</b><br><b>8</b> | 1.08<br>1 | 1.02<br>0 | 1.14<br>6 |       |       |        |       |
|                              |                        | Inverse variance weighted | 231 | 0.06<br>3      | 0.01<br>8 | <b>0.00</b><br><b>0</b> | 1.06<br>5 | 1.02<br>8 | 1.10<br>3 | 0.138 |       |        |       |
|                              |                        | Simple mode               | 231 | 0.12<br>2      | 0.06<br>6 | 0.06<br>5               | 1.12<br>9 | 0.99<br>3 | 1.28<br>4 |       |       |        |       |
|                              |                        | Weighted mode             | 231 | 0.10<br>5      | 0.04<br>2 | <b>0.01</b><br><b>3</b> | 1.11<br>0 | 1.02<br>3 | 1.20<br>4 |       |       |        |       |
|                              |                        | MR-PRESSO                 | 231 | 0.03<br>8      | 0.04<br>1 | 0.35<br>4               | 1.03<br>9 | 0.95<br>9 | 1.12<br>5 |       |       |        |       |
| <b>finn-a-I9_AF</b>          | Atrial fibrillation    | MR Egger                  | 231 | -<br>0.06<br>7 | 0.04<br>2 | 0.11<br>3               | 0.93<br>5 | 0.86<br>2 | 1.01<br>6 | 0.000 | 0.024 | 0.009  | NA*   |

|                                              |                 |                           |     |        |       |              |       |       |       |       |       |        |       |
|----------------------------------------------|-----------------|---------------------------|-----|--------|-------|--------------|-------|-------|-------|-------|-------|--------|-------|
|                                              | and fluttering  |                           |     |        |       |              |       |       |       |       |       |        |       |
|                                              |                 | Weighted median           | 231 | -0.043 | 0.032 | 0.180        | 0.958 | 0.900 | 1.020 |       |       |        |       |
|                                              |                 | Inverse variance weighted | 231 | 0.015  | 0.022 | 0.505        | 1.015 | 0.972 | 1.060 | 0.000 |       |        |       |
|                                              |                 | Simple mode               | 231 | 0.072  | 0.072 | 0.320        | 1.074 | 0.933 | 1.236 |       |       |        |       |
|                                              |                 | Weighted mode             | 231 | -0.018 | 0.034 | 0.595        | 0.982 | 0.918 | 1.050 |       |       |        |       |
|                                              |                 | MR-PRESSO                 | 231 | 0.035  | 0.043 | 0.418        | 1.036 | 0.952 | 1.127 |       |       |        |       |
| <b>The Global Lipids Genetics Consortium</b> |                 |                           |     |        |       |              |       |       |       |       |       |        |       |
| <b>ieu-a-299</b>                             | HDL cholesterol | MR Egger                  | 124 | 0.010  | 0.034 | 0.772        | 1.010 | 0.944 | 1.081 | 0.000 | 0.004 | <0.001 | 0.019 |
|                                              |                 | Weighted median           | 124 | -0.008 | 0.011 | 0.460        | 0.992 | 0.971 | 1.013 |       |       |        |       |
|                                              |                 | Inverse variance weighted | 124 | -0.075 | 0.019 | <b>0.000</b> | 0.928 | 0.894 | 0.962 | 0.000 |       |        |       |
|                                              |                 | Simple mode               | 124 | -0.029 | 0.021 | 0.171        | 0.971 | 0.932 | 1.012 |       |       |        |       |
|                                              |                 | Weighted mode             | 124 | 0.000  | 0.009 | 0.977        | 1.000 | 0.982 | 1.019 |       |       |        |       |
|                                              |                 | MR-PRESSO                 | 124 | -0.077 | 0.017 | <b>0.000</b> | 0.926 | 0.896 | 0.957 |       |       |        |       |
| <b>ieu-a-300</b>                             | LDL cholesterol | MR Egger                  | 122 | 0.019  | 0.022 | 0.379        | 1.019 | 0.977 | 1.063 | 0.000 | 0.914 | <0.001 | 0.554 |
|                                              |                 | Weighted median           | 122 | 0.018  | 0.011 | 0.106        | 1.018 | 0.996 | 1.040 |       |       |        |       |
|                                              |                 | Inverse variance weighted | 122 | 0.017  | 0.011 | 0.134        | 1.017 | 0.995 | 1.040 | 0.000 |       |        |       |
|                                              |                 | Simple mode               | 122 | 0.008  | 0.021 | 0.683        | 1.008 | 0.969 | 1.050 |       |       |        |       |
|                                              |                 | Weighted mode             | 122 | 0.018  | 0.010 | 0.054        | 1.019 | 1.000 | 1.038 |       |       |        |       |
|                                              |                 | MR-PRESSO                 | 122 | -0.077 | 0.017 | <b>0.000</b> | 0.926 | 0.896 | 0.957 |       |       |        |       |
| <b>ieu-a-302</b>                             | Triglycerides   | MR Egger                  | 123 | -0.001 | 0.045 | 0.981        | 0.999 | 0.914 | 1.092 | 0.000 | 0.140 | <0.001 | 0.442 |
|                                              |                 | Weighted median           | 123 | 0.028  | 0.010 | <b>0.008</b> | 1.028 | 1.007 | 1.049 |       |       |        |       |
|                                              |                 | Inverse variance weighted | 123 | 0.056  | 0.024 | <b>0.020</b> | 1.058 | 1.009 | 1.109 | 0.000 |       |        |       |

|  |                      |     |           |           |                         |           |           |           |  |  |  |  |  |
|--|----------------------|-----|-----------|-----------|-------------------------|-----------|-----------|-----------|--|--|--|--|--|
|  | weighte<br>d         |     |           |           |                         |           |           |           |  |  |  |  |  |
|  | Simple<br>mode       | 123 | 0.03<br>1 | 0.02<br>3 | 0.18<br>0               | 1.03<br>2 | 0.98<br>6 | 1.08<br>0 |  |  |  |  |  |
|  | Weight<br>ed<br>mode | 123 | 0.01<br>5 | 0.01<br>0 | 0.11<br>4               | 1.01<br>5 | 0.99<br>7 | 1.03<br>5 |  |  |  |  |  |
|  | MR-<br>PRESSO        | 123 | 0.02<br>2 | 0.01<br>0 | <b>0.03</b><br><b>2</b> | 1.02<br>3 | 1.00<br>2 | 1.04<br>4 |  |  |  |  |  |

\*No significant outliers

**Table S5** The causal effect of genetically predicted FG on outcomes in different studies.

| ID of<br>outcome           | Outcome                         | Metho<br>ds                         | No.<br>of<br>SNP<br>s | Bet<br>a       | SE        | $\rho$<br>valu<br>e     | OR        | LCI       | UCI       | Heterogene<br>ity $\rho$ value | $\rho$ value<br>for<br>interce<br>pt | $\rho$<br>value<br>for<br>MR-<br>PRESS<br>O | Distorti<br>on test<br>$\rho$ value |
|----------------------------|---------------------------------|-------------------------------------|-----------------------|----------------|-----------|-------------------------|-----------|-----------|-----------|--------------------------------|--------------------------------------|---------------------------------------------|-------------------------------------|
| ukb-d-<br>I9_K_CARDIA<br>C | Cardiovascul<br>ar mortality    | MR<br>Egger                         | 35                    | 0.00<br>3      | 0.00<br>2 | 0.11<br>5               | 1.00<br>3 | 0.99<br>9 | 1.00<br>7 | 0.978                          | 0.990                                | 0.993                                       |                                     |
|                            |                                 | Weight<br>ed<br>median              | 35                    | 0.00<br>3      | 0.00<br>1 | 0.05<br>6               | 1.00<br>3 | 1.00<br>0 | 1.00<br>6 |                                |                                      |                                             |                                     |
|                            |                                 | Inverse<br>variance<br>weighte<br>d | 35                    | 0.00<br>3      | 0.00<br>1 | <b>0.00</b><br><b>4</b> | 1.00<br>3 | 1.00<br>1 | 1.00<br>5 | 0.984                          |                                      |                                             |                                     |
|                            |                                 | Simple<br>mode                      | 35                    | 0.00<br>2      | 0.00<br>3 | 0.37<br>4               | 1.00<br>2 | 0.99<br>7 | 1.00<br>8 |                                |                                      |                                             |                                     |
|                            |                                 | Weight<br>ed<br>mode                | 35                    | 0.00<br>3      | 0.00<br>1 | 0.05<br>7               | 1.00<br>3 | 1.00<br>0 | 1.00<br>6 |                                |                                      |                                             |                                     |
| ieu-a-798                  | Myocardial<br>infarction        | MR<br>Egger                         | 35                    | 0.05<br>1      | 0.17<br>9 | 0.77<br>7               | 1.05<br>3 | 0.74<br>1 | 1.49<br>6 | 0.005                          | 0.282                                | 0.01                                        | NA*                                 |
|                            |                                 | Weight<br>ed<br>median              | 35                    | 0.20<br>8      | 0.11<br>5 | 0.07<br>1               | 1.23<br>1 | 0.98<br>2 | 1.54<br>4 |                                |                                      |                                             |                                     |
|                            |                                 | Inverse<br>variance<br>weighte<br>d | 35                    | 0.21<br>4      | 0.10<br>0 | <b>0.03</b><br><b>2</b> | 1.23<br>9 | 1.01<br>8 | 1.50<br>8 | 0.004                          |                                      |                                             |                                     |
|                            |                                 | Simple<br>mode                      | 35                    | 0.12<br>7      | 0.19<br>7 | 0.52<br>5               | 1.13<br>5 | 0.77<br>1 | 1.67<br>2 |                                |                                      |                                             |                                     |
|                            |                                 | Weight<br>ed<br>mode                | 35                    | 0.14<br>4      | 0.10<br>9 | 0.19<br>4               | 1.15<br>5 | 0.93<br>3 | 1.42<br>9 |                                |                                      |                                             |                                     |
| ukb-d-<br>I9_INTRACR<br>A  | Intracranial<br>haemorrhag<br>e | MR<br>Egger                         | 35                    | -<br>0.00<br>1 | 0.00<br>2 | 0.48<br>0               | 0.99<br>9 | 0.99<br>5 | 1.00<br>2 | 0.700                          | 0.891                                | 0.718                                       |                                     |
|                            |                                 | Weight<br>ed<br>median              | 35                    | -<br>0.00<br>1 | 0.00<br>1 | 0.45<br>2               | 0.99<br>9 | 0.99<br>6 | 1.00<br>2 |                                |                                      |                                             |                                     |



|                           |                          |                           |    |      |      |             |      |      |      |       |       |        |       |
|---------------------------|--------------------------|---------------------------|----|------|------|-------------|------|------|------|-------|-------|--------|-------|
|                           |                          | Inverse variance weighted | 35 | -    | 0.00 | 0.14        | 0.99 | 0.99 | 1.00 | 0.635 |       |        |       |
|                           |                          | Simple mode               | 35 | -    | 0.00 | 0.36        | 0.99 | 0.99 | 1.00 |       |       |        |       |
|                           |                          | Weighted mode             | 35 | -    | 0.00 | 0.45        | 0.99 | 0.99 | 1.00 |       |       |        |       |
|                           |                          | MR-PRESSO                 | 35 | -    | 0.00 | 0.12        | 0.99 | 0.99 | 1.00 |       |       |        |       |
| <b>ebi-a-GCST009541</b>   | Heart failure            | MR Egger                  | 35 | 0.09 | 0.17 | 0.59        | 1.09 | 0.78 | 1.53 | 0.009 | 0.597 | 0.011  | NA*   |
|                           |                          | Weighted median           | 35 | 0.20 | 0.10 | <b>0.04</b> | 1.22 | 1.00 | 1.50 |       |       |        |       |
|                           |                          | Inverse variance weighted | 35 | 0.17 | 0.08 | 0.05        | 1.18 | 0.99 | 1.40 | 0.011 |       |        |       |
|                           |                          | Simple mode               | 35 | 0.24 | 0.17 | 0.18        | 1.27 | 0.89 | 1.80 |       |       |        |       |
|                           |                          | Weighted mode             | 35 | 0.21 | 0.09 | <b>0.03</b> | 1.23 | 1.02 | 1.49 |       |       |        |       |
|                           |                          | MR-PRESSO                 | 35 | 0.11 | 0.07 | 0.12        | 1.12 | 0.97 | 1.30 |       |       |        |       |
| <b>ieu-a-7</b>            | Ischemic heart disease   | MR Egger                  | 35 | 0.11 | 0.17 | 0.51        | 1.12 | 0.79 | 1.57 | 0.000 | 0.389 | 0.707  |       |
|                           |                          | Weighted median           | 35 | 0.23 | 0.09 | <b>0.01</b> | 1.26 | 1.04 | 1.52 |       |       |        |       |
|                           |                          | Inverse variance weighted | 35 | 0.24 | 0.09 | <b>0.01</b> | 1.27 | 1.05 | 1.53 | 0.000 |       |        |       |
|                           |                          | Simple mode               | 35 | 0.15 | 0.18 | 0.41        | 1.16 | 0.81 | 1.67 |       |       |        |       |
|                           |                          | Weighted mode             | 35 | 0.20 | 0.08 | <b>0.02</b> | 1.22 | 1.03 | 1.45 |       |       |        |       |
|                           |                          | MR-PRESSO                 | 35 | 0.24 | 0.09 | <b>0.01</b> | 1.27 | 1.05 | 1.53 |       |       |        |       |
| <b>ukb-d-I9_CORATHERR</b> | Coronary atherosclerosis | MR Egger                  | 35 | 0.01 | 0.00 | 0.12        | 1.01 | 0.99 | 1.03 | 0.000 | 0.932 | <0.001 | 0.695 |
|                           |                          | Weighted median           | 35 | 0.01 | 0.00 | <b>0.00</b> | 1.01 | 1.00 | 1.02 |       |       |        |       |
|                           |                          | Inverse variance weighted | 35 | 0.01 | 0.00 | <b>0.00</b> | 1.01 | 1.00 | 1.02 | 0.000 |       |        |       |
|                           |                          | Simple mode               | 35 | 0.02 | 0.01 | 0.06        | 1.02 | 0.99 | 1.04 |       |       |        |       |
|                           |                          | Weighted mode             | 35 | 0.01 | 0.00 | <b>0.00</b> | 1.01 | 1.00 | 1.02 |       |       |        |       |
|                           |                          | MR-PRESSO                 | 35 | 0.01 | 0.00 | <b>0.00</b> | 1.01 | 1.00 | 1.02 |       |       |        |       |

Supplementary Material

|                         |                                    |                           |    |                |           |                         |           |           |           |       |       |                 |
|-------------------------|------------------------------------|---------------------------|----|----------------|-----------|-------------------------|-----------|-----------|-----------|-------|-------|-----------------|
| <b>ukb-d-19_CHD</b>     | Major coronary heart disease event | MR Egger                  | 35 | 0.00<br>6      | 0.00<br>7 | 0.37<br>8               | 1.00<br>6 | 0.99<br>2 | 1.02<br>1 | 0.097 | 0.784 | 0.092           |
|                         |                                    | Weighted median           | 35 | 0.01<br>1      | 0.00<br>5 | <b>0.02</b><br><b>0</b> | 1.01<br>1 | 1.00<br>2 | 1.02<br>0 |       |       |                 |
|                         |                                    | Inverse variance weighted | 35 | 0.00<br>8      | 0.00<br>3 | <b>0.01</b><br><b>7</b> | 1.00<br>8 | 1.00<br>1 | 1.01<br>5 | 0.117 |       |                 |
|                         |                                    | Simple mode               | 35 | 0.01<br>4      | 0.00<br>9 | 0.14<br>1               | 1.01<br>4 | 0.99<br>6 | 1.03<br>2 |       |       |                 |
| <b>bbj-a-144</b>        | Peripheral artery disease          | MR Egger                  | 32 | -<br>0.78<br>3 | 0.55<br>6 | 0.17<br>0               | 0.45<br>7 | 0.15<br>4 | 1.36<br>0 | 0.421 | 0.004 | 0.126           |
|                         |                                    | Weighted median           | 32 | 0.30<br>1      | 0.35<br>6 | 0.39<br>8               | 1.35<br>1 | 0.67<br>2 | 2.71<br>7 |       |       |                 |
|                         |                                    | Inverse variance weighted | 32 | 0.79<br>1      | 0.28<br>1 | <b>0.00</b><br><b>5</b> | 2.20<br>6 | 1.27<br>1 | 3.82<br>7 | 0.105 |       |                 |
|                         |                                    | Simple mode               | 32 | 1.10<br>5      | 0.57<br>1 | 0.06<br>2               | 3.01<br>9 | 0.98<br>6 | 9.24<br>5 |       |       |                 |
| <b>ukb-b-12493</b>      | Essential hypertension             | MR Egger                  | 35 | -<br>0.00<br>8 | 0.01<br>8 | 0.68<br>0               | 0.99<br>2 | 0.95<br>7 | 1.02<br>9 | 0.000 | 0.426 | <0.001<br>0.616 |
|                         |                                    | Weighted median           | 35 | 0.00<br>4      | 0.00<br>8 | 0.62<br>6               | 1.00<br>4 | 0.98<br>9 | 1.01<br>9 |       |       |                 |
|                         |                                    | Inverse variance weighted | 35 | 0.00<br>5      | 0.00<br>9 | 0.54<br>7               | 1.00<br>5 | 0.98<br>8 | 1.02<br>3 | 0.000 |       |                 |
|                         |                                    | Simple mode               | 35 | -<br>0.00<br>3 | 0.01<br>2 | 0.83<br>2               | 0.99<br>7 | 0.97<br>4 | 1.02<br>1 |       |       |                 |
| <b>ebi-a-GCST006906</b> | Stroke                             | MR Egger                  | 34 | -<br>0.15<br>8 | 0.17<br>5 | 0.37<br>3               | 0.85<br>4 | 0.60<br>7 | 1.20<br>2 | 0.001 | 0.030 | <0.001<br>0.801 |
|                         |                                    | Weighted median           | 34 | -<br>0.02<br>2 | 0.11<br>1 | 0.84<br>3               | 0.97<br>8 | 0.78<br>7 | 1.21<br>6 |       |       |                 |
|                         |                                    | Inverse variance          | 34 | 0.17<br>2      | 0.10<br>3 | 0.09<br>5               | 1.18<br>7 | 0.97<br>0 | 1.45<br>3 | 0.000 |       |                 |
|                         |                                    | Simple mode               | 34 | -<br>0.00<br>3 | 0.01<br>2 | 0.83<br>2               | 0.99<br>7 | 0.97<br>4 | 1.02<br>1 |       |       |                 |

|                              |                                             |                                     |    |                |           |           |           |           |           |       |       |        |       |
|------------------------------|---------------------------------------------|-------------------------------------|----|----------------|-----------|-----------|-----------|-----------|-----------|-------|-------|--------|-------|
|                              |                                             |                                     |    | weighte<br>d   |           |           |           |           |           |       |       |        |       |
|                              |                                             | Simple<br>mode                      | 34 | -<br>0.01<br>7 | 0.22<br>2 | 0.93<br>9 | 0.98<br>3 | 0.63<br>6 | 1.51<br>9 |       |       |        |       |
|                              |                                             | Weight<br>ed<br>mode                | 34 | -<br>0.02<br>9 | 0.09<br>2 | 0.75<br>3 | 0.97<br>1 | 0.81<br>1 | 1.16<br>4 |       |       |        |       |
|                              |                                             | MR-<br>PRESSO                       | 34 | 0.17<br>2      | 0.10<br>3 | 0.10<br>5 | 1.18<br>7 | 0.97<br>0 | 1.45<br>3 |       |       |        |       |
| <b>ebi-a-<br/>GCST006908</b> | Ischemic<br>stroke                          | MR<br>Egger                         | 35 | -<br>0.21<br>2 | 0.18<br>0 | 0.24<br>6 | 0.80<br>9 | 0.56<br>9 | 1.15<br>0 | 0.005 | 0.009 | <0.001 | 0.399 |
|                              |                                             | Weight<br>ed<br>median              | 35 | -<br>0.06<br>4 | 0.12<br>7 | 0.61<br>6 | 0.93<br>8 | 0.73<br>2 | 1.20<br>3 |       |       |        |       |
|                              |                                             | Inverse<br>variance<br>weighte<br>d | 35 | 0.20<br>6      | 0.10<br>9 | 0.05<br>8 | 1.22<br>8 | 0.99<br>3 | 1.52<br>0 | 0.000 |       |        |       |
|                              |                                             | Simple<br>mode                      | 35 | 0.01<br>3      | 0.25<br>5 | 0.95<br>9 | 1.01<br>3 | 0.61<br>5 | 1.67<br>1 |       |       |        |       |
|                              |                                             | Weight<br>ed<br>mode                | 35 | -<br>0.04<br>5 | 0.10<br>2 | 0.65<br>9 | 0.95<br>6 | 0.78<br>3 | 1.16<br>6 |       |       |        |       |
|                              |                                             | MR-<br>PRESSO                       | 35 | 0.20<br>6      | 0.10<br>9 | 0.06<br>7 | 1.22<br>8 | 0.99<br>3 | 1.52<br>0 |       |       |        |       |
| <b>ebi-a-<br/>GCST006414</b> | Atrial<br>fibrillation<br>and<br>fluttering | MR<br>Egger                         | 35 | 0.02<br>6      | 0.11<br>5 | 0.82<br>4 | 1.02<br>6 | 0.81<br>8 | 1.28<br>6 | 0.002 | 0.423 | 0.002  | 0.36  |
|                              |                                             | Weight<br>ed<br>median              | 35 | -<br>0.07<br>0 | 0.07<br>8 | 0.36<br>7 | 0.93<br>2 | 0.80<br>1 | 1.08<br>6 |       |       |        |       |
|                              |                                             | Inverse<br>variance<br>weighte<br>d | 35 | -<br>0.05<br>2 | 0.06<br>4 | 0.42<br>0 | 0.95<br>0 | 0.83<br>7 | 1.07<br>7 | 0.003 |       |        |       |
|                              |                                             | Simple<br>mode                      | 35 | -<br>0.08<br>5 | 0.15<br>6 | 0.58<br>7 | 0.91<br>8 | 0.06<br>4 | 1.24<br>6 |       |       |        |       |
|                              |                                             | Weight<br>ed<br>mode                | 35 | 0.00<br>4      | 0.07<br>5 | 0.95<br>6 | 1.00<br>4 | 0.86<br>6 | 1.16<br>4 |       |       |        |       |
|                              |                                             | MR-<br>PRESSO                       | 35 | -<br>0.05<br>2 | 0.06<br>4 | 0.42<br>6 | 0.95<br>0 | 0.83<br>7 | 1.07<br>7 |       |       |        |       |
| <b>ukb-d-<br/>30760_irnt</b> | HDL<br>cholesterol                          | MR<br>Egger                         | 35 | -<br>0.02<br>6 | 0.08<br>0 | 0.74<br>9 | 0.97<br>4 | 0.83<br>3 | 1.14<br>0 | 0.000 | 0.521 | <0.001 | 0.096 |
|                              |                                             | Weight<br>ed<br>median              | 35 | 0.01<br>3      | 0.01<br>2 | 0.28<br>6 | 1.01<br>3 | 0.98<br>9 | 1.03<br>8 |       |       |        |       |
|                              |                                             | Inverse<br>variance<br>weighte<br>d | 35 | 0.02<br>0      | 0.03<br>8 | 0.60<br>8 | 1.02<br>0 | 0.94<br>6 | 1.09<br>9 | 0.000 |       |        |       |
|                              |                                             | Simple<br>mode                      | 35 | 0.00<br>3      | 0.02<br>4 | 0.89<br>8 | 1.00<br>3 | 0.95<br>7 | 1.05<br>2 |       |       |        |       |
|                              |                                             | Weight<br>ed<br>mode                | 35 | 0.00<br>8      | 0.01<br>2 | 0.52<br>9 | 1.00<br>8 | 0.98<br>4 | 1.03<br>2 |       |       |        |       |
|                              |                                             | MR-<br>PRESSO                       | 35 | 0.00<br>2      | 0.01<br>0 | 0.86<br>1 | 1.00<br>2 | 0.98<br>3 | 1.02<br>1 |       |       |        |       |

Supplementary Material

|                         |                  |                           |       |        |       |              |       |       |       |       |       |        |        |
|-------------------------|------------------|---------------------------|-------|--------|-------|--------------|-------|-------|-------|-------|-------|--------|--------|
| <b>ukb-d-30780_irnt</b> | LDL cholesterol  | MR Egger                  | 35    | -0.050 | 0.108 | 0.650        | 0.952 | 0.769 | 1.177 | 0.000 | 0.899 | <0.001 | <0.001 |
|                         |                  | Weighted median           | 35    | -0.010 | 0.021 | 0.640        | 0.990 | 0.951 | 1.032 |       |       |        |        |
|                         |                  | Inverse variance weighted | 35    | -0.038 | 0.060 | 0.524        | 0.963 | 0.856 | 1.083 | 0.000 |       |        |        |
|                         |                  | Simple mode               | 35    | 0.046  | 0.043 | 0.283        | 1.048 | 0.964 | 1.139 |       |       |        |        |
|                         |                  | Weighted mode             | 35    | 0.001  | 0.019 | 0.969        | 1.001 | 0.963 | 1.039 |       |       |        |        |
| MR-PRESSO               | 35               | -0.038                    | 0.060 | 0.528  | 0.963 | 0.856        | 1.083 |       |       |       |       |        |        |
| <b>ukb-d-30870_irnt</b> | Triglycerides    | MR Egger                  | 35    | 0.050  | 0.251 | 0.844        | 1.051 | 0.642 | 1.720 | 0.000 | 0.485 | <0.001 | <0.001 |
|                         |                  | Weighted median           | 35    | 0.125  | 0.028 | <b>0.000</b> | 1.133 | 1.073 | 1.196 |       |       |        |        |
|                         |                  | Inverse variance weighted | 35    | -0.097 | 0.140 | 0.488        | 0.907 | 0.690 | 1.194 | 0.000 |       |        |        |
|                         |                  | Simple mode               | 35    | 0.079  | 0.067 | 0.247        | 1.083 | 0.949 | 1.236 |       |       |        |        |
|                         |                  | Weighted mode             | 35    | 0.101  | 0.021 | <b>0.000</b> | 1.106 | 1.061 | 1.153 |       |       |        |        |
| MR-PRESSO               | 35               | -0.097                    | 0.140 | 0.493  | 0.907 | 0.690        | 1.194 |       |       |       |       |        |        |
| <b>ukb-d-30630_irnt</b> | Apolipoprotein A | MR Egger                  | 35    | -0.024 | 0.039 | 0.540        | 0.976 | 0.904 | 1.054 | 0.000 | 0.792 | <0.001 | 0.452  |
|                         |                  | Weighted median           | 35    | -0.017 | 0.007 | <b>0.012</b> | 0.983 | 0.970 | 0.996 |       |       |        |        |
|                         |                  | Inverse variance weighted | 35    | -0.016 | 0.004 | 0.470        | 0.984 | 0.976 | 0.993 | 0.000 |       |        |        |
|                         |                  | Simple mode               | 35    | -0.017 | 0.014 | 0.235        | 0.983 | 0.957 | 1.011 |       |       |        |        |
|                         |                  | Weighted mode             | 35    | -0.011 | 0.006 | 0.082        | 0.989 | 0.977 | 1.001 |       |       |        |        |
| MR-PRESSO               | 35               | -0.016                    | 0.022 | 0.474  | 0.984 | 0.944        | 1.027 |       |       |       |       |        |        |
| <b>ukb-d-30640_irnt</b> | Apolipoprotein B | MR Egger                  | 35    | -0.015 | 0.037 | 0.686        | 0.985 | 0.915 | 1.060 | 0.000 | 0.749 | <0.001 | 0.051  |
|                         |                  | Weighted median           | 35    | 0.003  | 0.006 | 0.580        | 1.003 | 0.992 | 1.015 |       |       |        |        |
|                         |                  | Inverse variance weighted | 35    | -0.005 | 0.021 | 0.799        | 0.995 | 0.955 | 1.036 | 0.000 |       |        |        |

|                                      |                              |                                     |    |                |           |           |           |           |           |       |       |       |
|--------------------------------------|------------------------------|-------------------------------------|----|----------------|-----------|-----------|-----------|-----------|-----------|-------|-------|-------|
|                                      |                              |                                     |    | weighte<br>d   |           |           |           |           |           |       |       |       |
|                                      |                              | Simple<br>mode                      | 35 | 0.01<br>1      | 0.01<br>2 | 0.36<br>9 | 1.01<br>1 | 0.98<br>7 | 1.03<br>6 |       |       |       |
|                                      |                              | Weight<br>ed<br>mode                | 35 | 0.00<br>4      | 0.00<br>5 | 0.38<br>5 | 1.00<br>4 | 0.99<br>5 | 1.01<br>4 |       |       |       |
|                                      |                              | MR-<br>PRESSO                       | 35 | -<br>0.00<br>5 | 0.02<br>1 | 0.80<br>1 | 0.99<br>5 | 0.95<br>5 | 1.03<br>6 |       |       |       |
| <b>ukb-d-<br/>30790_irnt</b>         | Lipoprotein<br>A             | MR<br>Egger                         | 35 | -<br>0.00<br>1 | 0.04<br>1 | 0.97<br>2 | 0.99<br>9 | 0.92<br>1 | 1.08<br>3 | 0.040 | 0.624 | 0.06  |
|                                      |                              | Weight<br>ed<br>median              | 35 | -<br>0.03<br>3 | 0.03<br>0 | 0.27<br>7 | 0.96<br>8 | 0.91<br>3 | 1.02<br>7 |       |       |       |
|                                      |                              | Inverse<br>variance<br>weighte<br>d | 35 | -<br>0.01<br>8 | 0.02<br>3 | 0.42<br>3 | 0.98<br>2 | 0.93<br>9 | 1.02<br>7 | 0.048 |       |       |
|                                      |                              | Simple<br>mode                      | 35 | -<br>0.07<br>7 | 0.05<br>4 | 0.15<br>9 | 0.92<br>6 | 0.83<br>3 | 1.02<br>8 |       |       |       |
|                                      |                              | Weight<br>ed<br>mode                | 35 | -<br>0.01<br>9 | 0.02<br>7 | 0.49<br>7 | 0.98<br>2 | 0.93<br>1 | 1.03<br>5 |       |       |       |
|                                      |                              | MR-<br>PRESSO                       | 35 | -<br>0.01<br>8 | 0.02<br>3 | 0.42<br>8 | 0.98<br>2 | 0.93<br>9 | 1.02<br>7 |       |       |       |
| <b>FinnGen<br/>Study</b>             |                              |                                     |    |                |           |           |           |           |           |       |       |       |
| <b>finn-a-<br/>I9_K_CARDIA<br/>C</b> | Cardiovascul<br>ar mortality | MR<br>Egger                         | 17 | 0.28<br>7      | 0.49<br>7 | 0.57<br>2 | 1.33<br>3 | 0.50<br>3 | 3.53<br>0 | 0.546 | 0.927 | 0.641 |
|                                      |                              | Weight<br>ed<br>median              | 17 | 0.16<br>7      | 0.33<br>6 | 0.62<br>0 | 1.18<br>1 | 0.61<br>1 | 2.28<br>3 |       |       |       |
|                                      |                              | Inverse<br>variance<br>weighte<br>d | 17 | 0.08<br>0      | 0.28<br>5 | 0.77<br>9 | 1.08<br>3 | 0.62<br>0 | 1.89<br>2 | 0.598 |       |       |
|                                      |                              | Simple<br>mode                      | 17 | -<br>0.22<br>5 | 0.75<br>1 | 0.76<br>9 | 0.79<br>9 | 0.18<br>3 | 3.48<br>0 |       |       |       |
|                                      |                              | Weight<br>ed<br>mode                | 17 | 0.19<br>9      | 0.34<br>0 | 0.56<br>6 | 1.22<br>0 | 0.62<br>7 | 2.37<br>4 |       |       |       |
|                                      |                              | MR-<br>PRESSO                       | 17 | 0.15<br>2      | 0.12<br>4 | 0.22<br>9 | 1.16<br>4 | 0.91<br>3 | 1.48<br>5 |       |       |       |
| <b>finn-a-I9_MI</b>                  | Myocardial<br>infarction     | MR<br>Egger                         | 17 | 0.19<br>2      | 0.31<br>4 | 0.54<br>7 | 1.21<br>1 | 0.65<br>4 | 2.24<br>3 | 0.063 | 0.938 | 0.098 |
|                                      |                              | Weight<br>ed<br>median              | 17 | 0.26<br>2      | 0.19<br>8 | 0.18<br>6 | 1.29<br>9 | 0.88<br>2 | 1.91<br>5 |       |       |       |
|                                      |                              | Inverse<br>variance<br>weighte<br>d | 17 | 0.17<br>0      | 0.15<br>8 | 0.28<br>1 | 1.18<br>6 | 0.87<br>0 | 1.61<br>7 | 0.080 |       |       |
|                                      |                              | Simple<br>mode                      | 17 | 0.22<br>3      | 0.38<br>8 | 0.57<br>0 | 1.25<br>0 | 0.58<br>5 | 2.67<br>1 |       |       |       |
|                                      |                              | Weight<br>ed<br>mode                | 17 | 0.27<br>6      | 0.19<br>1 | 0.15<br>8 | 1.31<br>8 | 0.90<br>6 | 1.91<br>7 |       |       |       |

|                            |                          |                           |    |                |           |                         |           |           |           |       |       |       |
|----------------------------|--------------------------|---------------------------|----|----------------|-----------|-------------------------|-----------|-----------|-----------|-------|-------|-------|
|                            |                          | MR-PRESSO                 | 17 | 0.22<br>0      | 0.12<br>8 | 0.09<br>6               | 1.24<br>6 | 0.96<br>9 | 1.60<br>2 |       |       |       |
| <b>finn-a-I9_ICH</b>       | Intracranial haemorrhage | MR Egger                  | 17 | 3.09<br>9      | 0.95<br>9 | <b>0.00</b><br><b>6</b> | 22.1<br>7 | 3.38<br>6 | 145.<br>2 | 0.249 | 0.842 | 0.105 |
|                            |                          | Weighted median           | 17 | 2.30<br>8      | 0.69<br>0 | <b>0.00</b><br><b>1</b> | 10.0<br>4 | 2.60<br>0 | 38.8<br>3 |       |       |       |
|                            |                          | Inverse variance weighted | 17 | 1.13<br>1      | 0.56<br>3 | <b>0.04</b><br><b>5</b> | 3.09<br>9 | 1.02<br>8 | 9.34<br>0 | 0.289 |       |       |
|                            |                          | Simple mode               | 17 | -<br>0.00<br>1 | 1.67<br>9 | 1.00<br>0               | 0.99<br>9 | 0.03<br>7 | 26.8<br>2 |       |       |       |
|                            |                          | Weighted mode             | 17 | 2.28<br>5      | 0.72<br>7 | <b>0.00</b><br><b>6</b> | 9.82<br>7 | 2.36<br>4 | 40.8<br>4 |       |       |       |
|                            |                          | MR-PRESSO                 | 17 | -<br>0.06<br>8 | 0.21<br>7 | 0.75<br>7               | 0.93<br>4 | 0.61<br>0 | 1.43<br>0 |       |       |       |
| <b>finn-a-HEARTFAIL</b>    | Heart failure            | MR Egger                  | 17 | -<br>0.41<br>5 | 0.28<br>2 | 0.15<br>2               | 0.66<br>0 | 0.38<br>0 | 1.14<br>7 | 0.101 | 0.519 | 0.058 |
|                            |                          | Weighted median           | 17 | -<br>0.28<br>2 | 0.19<br>8 | 0.15<br>5               | 0.75<br>5 | 0.51<br>2 | 1.11<br>3 |       |       |       |
|                            |                          | Inverse variance weighted | 17 | -<br>0.25<br>7 | 0.14<br>3 | 0.07<br>2               | 0.77<br>4 | 0.58<br>5 | 1.02<br>3 | 0.113 |       |       |
|                            |                          | Simple mode               | 17 | 0.52<br>1      | 0.41<br>6 | 0.21<br>9               | 1.68<br>5 | 0.74<br>6 | 3.80<br>5 |       |       |       |
|                            |                          | Weighted mode             | 17 | -<br>0.24<br>4 | 0.20<br>9 | 0.25<br>2               | 0.78<br>3 | 0.52<br>0 | 1.18<br>0 |       |       |       |
|                            |                          | MR-PRESSO                 | 17 | -<br>0.11<br>0 | 0.12<br>0 | 0.36<br>2               | 0.89<br>5 | 0.70<br>8 | 1.13<br>2 |       |       |       |
| <b>finn-a-I9_ISCHHEART</b> | Ischemic heart disease   | MR Egger                  | 17 | -<br>0.10<br>7 | 0.20<br>9 | 0.61<br>2               | 0.89<br>8 | 0.59<br>6 | 1.35<br>4 | 0.166 | 0.295 | 0.077 |
|                            |                          | Weighted median           | 17 | 0.04<br>7      | 0.14<br>5 | 0.74<br>3               | 1.04<br>8 | 0.79<br>0 | 1.39<br>2 |       |       |       |
|                            |                          | Inverse variance weighted | 17 | 0.08<br>5      | 0.10<br>7 | 0.42<br>9               | 1.08<br>8 | 0.88<br>2 | 1.34<br>3 | 0.157 |       |       |
|                            |                          | Simple mode               | 17 | 0.08<br>7      | 0.26<br>1 | 0.74<br>0               | 1.09<br>1 | 0.65<br>4 | 1.82<br>2 |       |       |       |
|                            |                          | Weighted mode             | 17 | 0.05<br>4      | 0.13<br>8 | 0.69<br>9               | 1.05<br>5 | 0.80<br>5 | 1.38<br>3 |       |       |       |
|                            |                          | MR-PRESSO                 | 17 | 0.14<br>7      | 0.09<br>3 | 0.12<br>0               | 1.15<br>9 | 0.96<br>7 | 1.38<br>9 |       |       |       |
| <b>finn-a-I9_CORATHERR</b> | Coronary atherosclerosis | MR Egger                  | 17 | 0.18<br>8      | 0.22<br>9 | 0.41<br>8               | 1.20<br>7 | 0.77<br>1 | 1.89<br>0 | 0.244 | 0.904 | 0.231 |
|                            |                          | Weighted median           | 17 | 0.22<br>4      | 0.16<br>9 | 0.18<br>6               | 1.25<br>1 | 0.89<br>8 | 1.74<br>3 |       |       |       |

|                              |                                    |                           |    |        |       |              |       |       |       |       |       |        |       |
|------------------------------|------------------------------------|---------------------------|----|--------|-------|--------------|-------|-------|-------|-------|-------|--------|-------|
|                              |                                    | Inverse variance weighted | 17 | 0.164  | 0.115 | 0.154        | 1.178 | 0.940 | 1.477 | 0.286 |       |        |       |
|                              |                                    | Simple mode               | 17 | 0.446  | 0.318 | 0.171        | 1.563 | 0.837 | 2.917 |       |       |        |       |
|                              |                                    | Weighted mode             | 17 | 0.275  | 0.167 | 0.110        | 1.316 | 0.949 | 1.827 |       |       |        |       |
|                              |                                    | MR-PRESSO                 | 17 | 0.224  | 0.097 | <b>0.027</b> | 1.250 | 1.034 | 1.512 |       |       |        |       |
| <b>finn-a-I9_CHD</b>         | Major coronary heart disease event | MR Egger                  | 17 | 0.098  | 0.265 | 0.715        | 1.103 | 0.656 | 1.854 | 0.048 | 0.655 | 0.022  | NA*   |
|                              |                                    | Weighted median           | 17 | 0.147  | 0.164 | 0.368        | 1.159 | 0.841 | 1.597 |       |       |        |       |
|                              |                                    | Inverse variance weighted | 17 | -0.005 | 0.134 | 0.969        | 0.995 | 0.765 | 1.293 | 0.057 |       |        |       |
|                              |                                    | Simple mode               | 17 | -0.180 | 0.296 | 0.546        | 0.835 | 0.468 | 1.490 |       |       |        |       |
|                              |                                    | Weighted mode             | 17 | 0.084  | 0.154 | 0.590        | 1.087 | 0.804 | 1.471 |       |       |        |       |
|                              |                                    | MR-PRESSO                 | 17 | 0.121  | 0.113 | 0.294        | 1.128 | 0.903 | 1.409 |       |       |        |       |
| <b>finn-a-I9_PAD</b>         | Peripheral artery disease          | MR Egger                  | 17 | 0.405  | 0.527 | 0.449        | 1.499 | 0.533 | 4.213 | 0.000 | 0.801 | <0.001 | NA*   |
|                              |                                    | Weighted median           | 17 | 0.325  | 0.244 | 0.183        | 1.383 | 0.858 | 2.231 |       |       |        |       |
|                              |                                    | Inverse variance weighted | 17 | 0.520  | 0.265 | <b>0.050</b> | 1.682 | 1.000 | 2.831 | 0.000 |       |        |       |
|                              |                                    | Simple mode               | 17 | 0.819  | 0.461 | 0.086        | 2.267 | 0.918 | 5.599 |       |       |        |       |
|                              |                                    | Weighted mode             | 17 | 0.380  | 0.230 | 0.108        | 1.462 | 0.932 | 2.293 |       |       |        |       |
|                              |                                    | MR-PRESSO                 | 17 | 0.441  | 0.212 | <b>0.045</b> | 1.555 | 1.027 | 2.353 |       |       |        |       |
| <b>finn-a-I9_HYPTENSE SS</b> | Essential hypertension             | MR Egger                  | 17 | -0.500 | 0.212 | <b>0.025</b> | 0.606 | 0.400 | 0.918 | 0.002 | 0.081 | <0.001 | 0.143 |
|                              |                                    | Weighted median           | 17 | -0.251 | 0.113 | <b>0.026</b> | 0.778 | 0.623 | 0.971 |       |       |        |       |
|                              |                                    | Inverse variance weighted | 17 | -0.172 | 0.113 | 0.127        | 0.842 | 0.675 | 1.050 | 0.001 |       |        |       |
|                              |                                    | Simple mode               | 17 | -0.180 | 0.195 | 0.361        | 0.835 | 0.570 | 1.223 |       |       |        |       |
|                              |                                    | Weighted mode             | 17 | -0.279 | 0.101 | <b>0.009</b> | 0.756 | 0.621 | 0.921 |       |       |        |       |

|                                              |                                             |                                     |    |                |           |           |           |           |           |       |       |        |       |
|----------------------------------------------|---------------------------------------------|-------------------------------------|----|----------------|-----------|-----------|-----------|-----------|-----------|-------|-------|--------|-------|
|                                              |                                             | MR-<br>PRESSO                       | 17 | -<br>0.08<br>5 | 0.09<br>5 | 0.38<br>2 | 0.91<br>9 | 0.76<br>2 | 1.10<br>8 |       |       |        |       |
| <b>finn-a-<br/>C_STROKE</b>                  | Stroke                                      | MR<br>Egger                         | 17 | -<br>0.32<br>9 | 0.22<br>4 | 0.15<br>3 | 0.72<br>0 | 0.46<br>4 | 1.11<br>6 | 0.300 | 0.029 | 0.149  |       |
|                                              |                                             | Weight<br>ed<br>median              | 17 | 0.05<br>1      | 0.16<br>0 | 0.75<br>0 | 1.05<br>2 | 0.76<br>9 | 1.44<br>1 |       |       |        |       |
|                                              |                                             | Inverse<br>variance<br>weighte<br>d | 17 | 0.11<br>2      | 0.12<br>2 | 0.35<br>9 | 1.11<br>9 | 0.88<br>0 | 1.42<br>2 | 0.141 |       |        |       |
|                                              |                                             | Simple<br>mode                      | 17 | 0.10<br>6      | 0.30<br>4 | 0.72<br>9 | 1.11<br>2 | 0.61<br>3 | 2.01<br>8 |       |       |        |       |
|                                              |                                             | Weight<br>ed<br>mode                | 17 | -<br>0.09<br>9 | 0.16<br>5 | 0.55<br>1 | 0.90<br>5 | 0.65<br>6 | 1.25<br>1 |       |       |        |       |
|                                              |                                             | MR-<br>PRESSO                       | 17 | 0.12<br>8      | 0.09<br>7 | 0.19<br>8 | 1.13<br>6 | 0.93<br>9 | 1.37<br>5 |       |       |        |       |
| <b>finn-a-<br/>I9_STR_EXH</b>                | Ischemic<br>stroke                          | MR<br>Egger                         | 17 | 0.04<br>4      | 0.29<br>4 | 0.88<br>2 | 1.04<br>5 | 0.58<br>7 | 1.86<br>0 | 0.102 | 0.866 | 0.165  |       |
|                                              |                                             | Weight<br>ed<br>median              | 17 | -<br>0.07<br>4 | 0.19<br>6 | 0.70<br>8 | 0.92<br>9 | 0.63<br>2 | 1.36<br>5 |       |       |        |       |
|                                              |                                             | Inverse<br>variance<br>weighte<br>d | 17 | 0.08<br>7      | 0.14<br>8 | 0.55<br>7 | 1.09<br>1 | 0.81<br>6 | 1.45<br>9 | 0.126 |       |        |       |
|                                              |                                             | Simple<br>mode                      | 17 | 0.30<br>0      | 0.38<br>2 | 0.43<br>9 | 1.34<br>9 | 0.63<br>8 | 2.85<br>4 |       |       |        |       |
|                                              |                                             | Weight<br>ed<br>mode                | 17 | -<br>0.01<br>9 | 0.20<br>4 | 0.92<br>5 | 0.98<br>1 | 0.65<br>8 | 1.46<br>3 |       |       |        |       |
|                                              |                                             | MR-<br>PRESSO                       | 17 | 0.12<br>4      | 0.12<br>0 | 0.30<br>8 | 1.13<br>3 | 0.89<br>5 | 1.43<br>3 |       |       |        |       |
| <b>finn-a-I9_AF</b>                          | Atrial<br>fibrillation<br>and<br>fluttering | MR<br>Egger                         | 17 | -<br>0.16<br>4 | 0.29<br>3 | 0.57<br>9 | 0.84<br>8 | 0.47<br>8 | 1.50<br>6 | 0.089 | 0.719 | 0.014  | NA*   |
|                                              |                                             | Weight<br>ed<br>median              | 17 | -<br>0.21<br>6 | 0.19<br>4 | 0.26<br>6 | 0.80<br>6 | 0.55<br>2 | 1.17<br>8 |       |       |        |       |
|                                              |                                             | Inverse<br>variance<br>weighte<br>d | 17 | -<br>0.25<br>6 | 0.14<br>8 | 0.08<br>3 | 0.77<br>4 | 0.58<br>0 | 1.03<br>4 | 0.107 |       |        |       |
|                                              |                                             | Simple<br>mode                      | 17 | -<br>0.01<br>3 | 0.35<br>2 | 0.97<br>1 | 0.98<br>7 | 0.49<br>5 | 1.96<br>7 |       |       |        |       |
|                                              |                                             | Weight<br>ed<br>mode                | 17 | -<br>0.22<br>2 | 0.20<br>4 | 0.28<br>6 | 0.80<br>1 | 0.53<br>7 | 1.19<br>5 |       |       |        |       |
|                                              |                                             | MR-<br>PRESSO                       | 17 | -<br>0.05<br>7 | 0.13<br>2 | 0.66<br>9 | 0.94<br>5 | 0.73<br>0 | 1.22<br>3 |       |       |        |       |
| <b>The Global Lipids Genetics Consortium</b> |                                             |                                     |    |                |           |           |           |           |           |       |       |        |       |
| <b>ieu-a-299</b>                             | HDL<br>cholesterol                          | MR<br>Egger                         | 35 | 0.03<br>0      | 0.15<br>3 | 0.84<br>5 | 1.03<br>0 | 0.76<br>4 | 1.39<br>0 | 0.000 | 0.716 | <0.001 | 0.915 |



|                  |                 |                           |    |        |       |       |       |       |       |       |       |        |        |
|------------------|-----------------|---------------------------|----|--------|-------|-------|-------|-------|-------|-------|-------|--------|--------|
|                  |                 | Weighted median           | 35 | 0.040  | 0.037 | 0.285 | 1.040 | 0.968 | 1.119 |       |       |        |        |
|                  |                 | Inverse variance weighted | 35 | 0.077  | 0.083 | 0.357 | 1.080 | 0.917 | 1.271 | 0.000 |       |        |        |
|                  |                 | Simple mode               | 35 | 0.040  | 0.072 | 0.583 | 1.041 | 0.903 | 1.199 |       |       |        |        |
|                  |                 | Weighted mode             | 35 | 0.040  | 0.033 | 0.238 | 1.041 | 0.975 | 1.111 |       |       |        |        |
|                  |                 | MR-PRESSO                 | 35 | 0.077  | 0.083 | 0.363 | 1.080 | 0.917 | 1.271 |       |       |        |        |
| <b>ieu-a-300</b> | LDL cholesterol | MR Egger                  | 35 | -0.070 | 0.169 | 0.680 | 0.932 | 0.670 | 1.297 | 0.000 | 0.423 | <0.001 | 0.657  |
|                  |                 | Weighted median           | 35 | 0.017  | 0.043 | 0.685 | 1.018 | 0.935 | 1.107 |       |       |        |        |
|                  |                 | Inverse variance weighted | 35 | 0.044  | 0.092 | 0.635 | 1.045 | 0.872 | 1.253 | 0.000 |       |        |        |
|                  |                 | Simple mode               | 35 | 0.027  | 0.091 | 0.765 | 1.028 | 0.860 | 1.228 |       |       |        |        |
|                  |                 | Weighted mode             | 35 | 0.027  | 0.040 | 0.503 | 1.028 | 0.950 | 1.112 |       |       |        |        |
|                  |                 | MR-PRESSO                 | 35 | 0.044  | 0.092 | 0.638 | 1.045 | 0.872 | 1.253 |       |       |        |        |
| <b>ieu-a-302</b> | Triglycerides   | MR Egger                  | 35 | -0.070 | 0.281 | 0.804 | 0.932 | 0.538 | 1.616 | 0.000 | 0.671 | <0.001 | <0.001 |
|                  |                 | Weighted median           | 35 | 0.023  | 0.036 | 0.536 | 1.023 | 0.952 | 1.099 |       |       |        |        |
|                  |                 | Inverse variance weighted | 35 | -0.171 | 0.153 | 0.263 | 0.843 | 0.625 | 1.137 | 0.000 |       |        |        |
|                  |                 | Simple mode               | 35 | -0.004 | 0.065 | 0.946 | 0.996 | 0.876 | 1.131 |       |       |        |        |
|                  |                 | Weighted mode             | 35 | 0.020  | 0.029 | 0.501 | 1.020 | 0.963 | 1.080 |       |       |        |        |
|                  |                 | MR-PRESSO                 | 35 | -0.171 | 0.153 | 0.271 | 0.843 | 0.625 | 1.137 |       |       |        |        |

\*No significant outliers

**Table S6** The causal effect of genetically predicted FI on outcomes in different studies.

| ID of outcome       | Outcome                  | Methods                   | No. of SNPs | Beta   | SE    | $p$ value    | OR    | LCI   | UCI   | Heterogeneity $p$ value | $p$ value for intercept | $p$ value for MR-PRESSO | Distortion test $p$ value |
|---------------------|--------------------------|---------------------------|-------------|--------|-------|--------------|-------|-------|-------|-------------------------|-------------------------|-------------------------|---------------------------|
| ukb-d-I9_K_CARDIA C | Cardiovascular mortality | MR Egger                  | 18          | 0.018  | 0.016 | 0.279        | 1.018 | 0.987 | 1.050 | 0.415                   | 0.376                   | 0.434                   |                           |
|                     |                          | Weighted median           | 18          | 0.006  | 0.004 | 0.144        | 1.006 | 0.998 | 1.014 |                         |                         |                         |                           |
|                     |                          | Inverse variance weighted | 18          | 0.004  | 0.003 | 0.216        | 1.004 | 0.998 | 1.009 | 0.428                   |                         |                         |                           |
|                     |                          | Simple mode               | 18          | 0.007  | 0.007 | 0.311        | 1.007 | 0.994 | 1.020 |                         |                         |                         |                           |
|                     |                          | Weighted mode             | 18          | 0.005  | 0.006 | 0.417        | 1.005 | 0.993 | 1.018 |                         |                         |                         |                           |
| ieu-a-798           | Myocardial infarction    | MR Egger                  | 17          | -1.531 | 1.390 | 0.292        | 0.216 | 0.014 | 3.297 | 0.005                   | 0.251                   | 0.006                   | NA*                       |
|                     |                          | Weighted median           | 17          | 0.529  | 0.295 | 0.073        | 1.697 | 0.953 | 3.024 |                         |                         |                         |                           |
|                     |                          | Inverse variance weighted | 17          | 0.596  | 0.271 | <b>0.028</b> | 1.815 | 1.068 | 3.085 | 0.003                   |                         |                         |                           |
|                     |                          | Simple mode               | 17          | 0.358  | 0.587 | 0.552        | 1.431 | 0.453 | 4.525 |                         |                         |                         |                           |
|                     |                          | Weighted mode             | 17          | 0.300  | 0.508 | 0.565        | 1.350 | 0.499 | 3.654 |                         |                         |                         |                           |
| ukb-d-I9_INTRACRA A | Intracranial haemorrhage | MR Egger                  | 17          | -0.006 | 0.019 | 0.763        | 0.994 | 0.959 | 1.031 | 0.016                   | 0.824                   | 0.022                   | 0.507                     |
|                     |                          | Weighted median           | 17          | -0.005 | 0.003 | 0.117        | 0.995 | 0.989 | 1.001 |                         |                         |                         |                           |
|                     |                          | Inverse variance weighted | 17          | -0.002 | 0.003 | 0.597        | 0.998 | 0.993 | 1.004 | 0.023                   |                         |                         |                           |
|                     |                          | Simple mode               | 17          | -0.005 | 0.005 | 0.315        | 0.995 | 0.985 | 1.005 |                         |                         |                         |                           |
|                     |                          | Weighted mode             | 17          | -0.005 | 0.005 | 0.258        | 0.995 | 0.986 | 1.004 |                         |                         |                         |                           |
| MR-PRESSO           |                          | 17                        | -0.004      | 0.002  | 0.110 | 0.996        | 0.991 | 1.001 |       |                         |                         |                         |                           |

|                         |                                    |                           |    |                |           |                         |           |           |       |       |       |        |       |
|-------------------------|------------------------------------|---------------------------|----|----------------|-----------|-------------------------|-----------|-----------|-------|-------|-------|--------|-------|
| <b>ebi-a-GCST009541</b> | Heart failure                      | MR Egger                  | 18 | 1.54<br>8      | 1.25<br>4 | 0.23<br>5               | 4.70<br>2 | 0.40<br>2 | 54.92 | 0.000 | 0.285 | <0.001 |       |
|                         |                                    | Weighted median           | 18 | -<br>0.03<br>6 | 0.18<br>2 | 0.84<br>2               | 0.96<br>4 | 0.67<br>5 | 1.379 |       |       |        |       |
|                         |                                    | Inverse variance weighted | 18 | 0.17<br>9      | 0.20<br>5 | 0.38<br>4               | 1.19<br>6 | 0.80<br>0 | 1.788 | 0.000 |       |        |       |
|                         |                                    | Simple mode               | 18 | -<br>0.01<br>2 | 0.29<br>3 | 0.96<br>8               | 0.98<br>8 | 0.55<br>6 | 1.755 |       |       |        |       |
|                         |                                    | Weighted mode             | 18 | -<br>0.04<br>0 | 0.27<br>9 | 0.88<br>9               | 0.96<br>1 | 0.55<br>7 | 1.660 |       |       |        |       |
|                         |                                    | MR-PRESSO                 | 18 | 0.17<br>9      | 0.20<br>5 | 0.39<br>6               | 1.19<br>6 | 0.80<br>0 | 1.788 |       |       |        |       |
| <b>ieu-a-7</b>          | Ischemic heart disease             | MR Egger                  | 18 | -<br>1.18<br>0 | 1.45<br>2 | 0.42<br>8               | 0.30<br>7 | 0.01<br>8 | 5.294 | 0.001 | 0.203 | 0.002  | 0.459 |
|                         |                                    | Weighted median           | 18 | 0.81<br>5      | 0.24<br>6 | <b>0.00</b><br><b>1</b> | 2.26<br>0 | 1.39<br>7 | 3.657 |       |       |        |       |
|                         |                                    | Inverse variance weighted | 18 | 0.72<br>1      | 0.24<br>3 | <b>0.00</b><br><b>3</b> | 2.05<br>7 | 1.27<br>8 | 3.311 | 0.000 |       |        |       |
|                         |                                    | Simple mode               | 18 | 1.29<br>1      | 0.48<br>7 | <b>0.01</b><br><b>7</b> | 3.63<br>6 | 1.40<br>0 | 9.441 |       |       |        |       |
|                         |                                    | Weighted mode             | 18 | 1.29<br>1      | 0.50<br>3 | <b>0.02</b><br><b>0</b> | 3.63<br>6 | 1.35<br>8 | 9.738 |       |       |        |       |
|                         |                                    | MR-PRESSO                 | 18 | 0.72<br>1      | 0.24<br>3 | <b>0.00</b><br><b>9</b> | 2.05<br>7 | 1.27<br>8 | 3.311 |       |       |        |       |
| <b>ukb-d-I9_CORATHR</b> | Coronary atherosclerosis           | MR Egger                  | 18 | -<br>0.14<br>4 | 0.06<br>1 | <b>0.03</b><br><b>5</b> | 0.86<br>6 | 0.76<br>9 | 0.975 | 0.037 | 0.012 | <0.001 | 0.484 |
|                         |                                    | Weighted median           | 18 | 0.04<br>4      | 0.01<br>4 | <b>0.00</b><br><b>1</b> | 1.04<br>5 | 1.01<br>7 | 1.074 |       |       |        |       |
|                         |                                    | Inverse variance weighted | 18 | 0.03<br>2      | 0.01<br>4 | <b>0.02</b><br><b>4</b> | 1.03<br>3 | 1.00<br>4 | 1.062 | 0.000 |       |        |       |
|                         |                                    | Simple mode               | 18 | 0.06<br>0      | 0.02<br>6 | <b>0.03</b><br><b>7</b> | 1.06<br>2 | 1.00<br>9 | 1.116 |       |       |        |       |
|                         |                                    | Weighted mode             | 18 | 0.05<br>8      | 0.02<br>3 | <b>0.02</b><br><b>6</b> | 1.06<br>0 | 1.01<br>3 | 1.108 |       |       |        |       |
|                         |                                    | MR-PRESSO                 | 18 | 0.04<br>0      | 0.01<br>1 | <b>0.00</b><br><b>5</b> | 1.04<br>1 | 1.01<br>8 | 1.064 |       |       |        |       |
| <b>ukb-d-I9_CHD</b>     | Major coronary heart disease event | MR Egger                  | 18 | -<br>0.10<br>0 | 0.04<br>4 | <b>0.04</b><br><b>1</b> | 0.90<br>5 | 0.83<br>0 | 0.985 | 0.209 | 0.015 | 0.016  | NA*   |
|                         |                                    | Weighted median           | 18 | 0.02<br>4      | 0.01<br>1 | <b>0.03</b><br><b>2</b> | 1.02<br>4 | 1.00<br>2 | 1.047 |       |       |        |       |
|                         |                                    | Inverse variance          | 18 | 0.02<br>1      | 0.01<br>0 | <b>0.03</b><br><b>9</b> | 1.02<br>1 | 1.00<br>1 | 1.041 | 0.017 |       |        |       |

|                         |                           |                  |    |                   |           |                         |           |           |            |       |       |              |
|-------------------------|---------------------------|------------------|----|-------------------|-----------|-------------------------|-----------|-----------|------------|-------|-------|--------------|
|                         |                           |                  |    | e<br>weighte<br>d |           |                         |           |           |            |       |       |              |
|                         |                           | Simple mode      | 18 | 0.02<br>9         | 0.02<br>2 | 0.22<br>0               | 1.02<br>9 | 0.98<br>5 | 1.076      |       |       |              |
|                         |                           | Weighted mode    | 18 | 0.02<br>3         | 0.02<br>1 | 0.28<br>9               | 1.02<br>4 | 0.98<br>2 | 1.067      |       |       |              |
|                         |                           | MR-PRESSO        | 18 | 0.02<br>1         | 0.01<br>0 | 0.06<br>0               | 1.02<br>1 | 1.00<br>1 | 1.041      |       |       |              |
| <b>bbj-a-144</b>        | Peripheral artery disease | MR Egger         | 17 | 1.12<br>1         | 3.64<br>7 | 0.76<br>3               | 3.06<br>8 | 0.00<br>2 | 3901.<br>3 | 0.094 | 0.964 | 0.141        |
|                         |                           | Weighted median  | 17 | 1.96<br>9         | 0.64<br>1 | <b>0.00</b><br><b>2</b> | 7.16<br>3 | 2.03<br>9 | 25.16      |       |       |              |
|                         |                           | Inverse variance | 17 | 1.28<br>5         | 0.44<br>5 | <b>0.00</b><br><b>4</b> | 3.61<br>4 | 1.51<br>0 | 8.650      | 0.126 |       |              |
|                         |                           |                  |    | e<br>weighte<br>d |           |                         |           |           |            |       |       |              |
|                         |                           | Simple mode      | 17 | 2.22<br>3         | 0.91<br>6 | <b>0.02</b><br><b>7</b> | 9.23<br>6 | 1.53<br>5 | 55.56      |       |       |              |
|                         |                           | Weighted mode    | 17 | 2.16<br>0         | 0.91<br>3 | <b>0.03</b><br><b>1</b> | 8.67<br>5 | 1.44<br>9 | 51.93      |       |       |              |
|                         |                           | MR-PRESSO        | 17 | 1.28<br>5         | 0.52<br>9 | <b>0.02</b><br><b>7</b> | 3.61<br>4 | 1.28<br>2 | 10.18      |       |       |              |
| <b>ukb-b-12493</b>      | Essential hypertension    | MR Egger         | 18 | 0.08<br>7         | 0.11<br>5 | 0.46<br>7               | 1.09<br>1 | 0.87<br>0 | 1.367      | 0.000 | 0.984 | <0.001 0.326 |
|                         |                           | Weighted median  | 18 | 0.09<br>5         | 0.02<br>1 | <b>0.00</b><br><b>0</b> | 1.10<br>0 | 1.05<br>6 | 1.146      |       |       |              |
|                         |                           | Inverse variance | 18 | 0.08<br>9         | 0.02<br>1 | <b>0.00</b><br><b>0</b> | 1.09<br>3 | 1.05<br>0 | 1.138      | 0.000 |       |              |
|                         |                           |                  |    | e<br>weighte<br>d |           |                         |           |           |            |       |       |              |
|                         |                           | Simple mode      | 18 | 0.13<br>8         | 0.03<br>7 | <b>0.00</b><br><b>3</b> | 1.14<br>8 | 1.06<br>7 | 1.235      |       |       |              |
|                         |                           | Weighted mode    | 18 | 0.13<br>6         | 0.03<br>5 | <b>0.00</b><br><b>2</b> | 1.14<br>6 | 1.06<br>9 | 1.228      |       |       |              |
|                         |                           | MR-PRESSO        | 18 | 0.11<br>1         | 0.01<br>8 | <b>0.00</b><br><b>0</b> | 1.11<br>7 | 1.07<br>8 | 1.158      |       |       |              |
| <b>ebi-a-GCST006906</b> | Stroke                    | MR Egger         | 17 | 0.12<br>1         | 1.10<br>6 | 0.91<br>5               | 1.12<br>8 | 0.12<br>9 | 9.868      | 0.084 | 0.931 | 0.123        |
|                         |                           | Weighted median  | 17 | 0.17<br>3         | 0.21<br>8 | 0.43<br>0               | 1.18<br>8 | 0.77<br>4 | 1.823      |       |       |              |
|                         |                           | Inverse variance | 17 | 0.19<br>6         | 0.18<br>8 | 0.29<br>8               | 1.21<br>6 | 0.84<br>1 | 1.759      | 0.113 |       |              |
|                         |                           |                  |    | e<br>weighte<br>d |           |                         |           |           |            |       |       |              |
|                         |                           | Simple mode      | 17 | 0.34<br>4         | 0.34<br>6 | 0.33<br>6               | 1.41<br>0 | 0.71<br>5 | 2.781      |       |       |              |
|                         |                           | Weighted mode    | 17 | 0.23<br>5         | 0.35<br>5 | 0.51<br>7               | 1.26<br>5 | 0.63<br>1 | 2.537      |       |       |              |
|                         |                           | MR-PRESSO        | 17 | 0.02<br>4         | 0.18<br>2 | 0.89<br>7               | 1.02<br>4 | 0.71<br>7 | 1.464      |       |       |              |

|                         |                                    |                           |    |                           |      |             |          |      |       |       |       |        |       |
|-------------------------|------------------------------------|---------------------------|----|---------------------------|------|-------------|----------|------|-------|-------|-------|--------|-------|
| <b>ebi-a-GCST006908</b> | Ischemic stroke                    | MR Egger                  | 17 | -                         | 1.16 | 0.89        | 0.85     | 0.08 | 8.445 | 0.356 | 0.945 | 0.155  |       |
|                         |                                    |                           |    | 0.15                      | 6    | 8           | 9        | 7    |       |       |       |        |       |
|                         |                                    |                           |    | 1                         |      |             |          |      |       |       |       |        |       |
|                         |                                    | Weighted median           | 17 | 0.25                      | 0.22 | 0.24        | 1.29     | 0.84 | 1.991 |       |       |        |       |
|                         |                                    | Inverse variance weighted | 17 | 0.14                      | 0.18 | 0.43        | 1.15     | 0.80 | 1.670 | 0.434 |       |        |       |
|                         |                                    | Simple mode               | 17 | 0.47                      | 0.36 | 0.20        | 1.60     | 0.79 | 3.267 |       |       |        |       |
|                         |                                    |                           | 6  | 1                         | 7    | 9           | 2        |      |       |       |       |        |       |
|                         |                                    | Weighted mode             | 17 | 0.35                      | 0.36 | 0.34        | 1.42     | 0.69 | 2.935 |       |       |        |       |
|                         |                                    |                           |    | 5                         | 8    | 9           | 6        | 3    |       |       |       |        |       |
|                         |                                    | MR-PRESSO                 | 17 | 0.01                      | 0.19 | 0.93        | 1.01     | 0.69 | 1.479 |       |       |        |       |
|                         |                                    |                           |    | 7                         | 1    | 1           | 7        | 9    |       |       |       |        |       |
| <b>ebi-a-GCST006414</b> | Atrial fibrillation and fluttering | MR Egger                  | 17 | 0.33                      | 1.13 | 0.77        | 1.40     | 0.15 | 12.95 | 0.000 | 0.720 | <0.001 | 0.547 |
|                         |                                    |                           |    | 7                         | 5    | 1           | 1        | 1    |       |       |       |        |       |
|                         |                                    |                           |    | Weighted median           | 17   | -           | 0.17     | 0.41 | 0.86  | 0.61  | 1.219 |        |       |
|                         |                                    |                           |    |                           |      | 0.14        | 4        | 2    | 7     | 7     |       |        |       |
|                         |                                    |                           |    |                           |      | 3           |          |      |       |       |       |        |       |
|                         |                                    |                           |    | Inverse variance weighted | 17   | -           | 0.18     | 0.70 | 0.93  | 0.64  | 1.339 | 0.000  |       |
|                         |                                    |                           |    | 0.07                      | 5    | 1           | 1        | 8    |       |       |       |        |       |
|                         |                                    |                           |    | 1                         |      |             |          |      |       |       |       |        |       |
|                         |                                    | Simple mode               | 17 | -                         | 0.30 | 0.28        | 0.71     | 0.39 | 1.291 |       |       |        |       |
|                         |                                    |                           |    | 0.33                      | 1    | 3           | 6        | 7    |       |       |       |        |       |
|                         |                                    |                           |    | 4                         |      |             |          |      |       |       |       |        |       |
|                         |                                    | Weighted mode             | 17 | -                         | 0.31 | 0.36        | 0.74     | 0.40 | 1.387 |       |       |        |       |
|                         |                                    |                           |    | 0.29                      | 7    | 7           | 5        | 0    |       |       |       |        |       |
|                         |                                    |                           |    | 4                         |      |             |          |      |       |       |       |        |       |
|                         |                                    | MR-PRESSO                 | 17 | -                         | 0.18 | 0.70        | 0.93     | 0.64 | 1.339 |       |       |        |       |
|                         |                                    |                           |    | 0.07                      | 5    | 6           | 1        | 8    |       |       |       |        |       |
|                         |                                    |                           |    | 1                         |      |             |          |      |       |       |       |        |       |
| <b>ukb-d-30760_irnt</b> | HDL cholesterol                    | MR Egger                  | 18 | -                         | 0.55 | 0.61        | 0.74     | 0.25 | 2.231 | 0.000 | 0.913 | <0.001 | 0.746 |
|                         |                                    |                           |    | 0.29                      | 7    | 0           | 8        | 1    |       |       |       |        |       |
|                         |                                    |                           |    | 0                         |      |             |          |      |       |       |       |        |       |
|                         |                                    | Weighted median           | 18 | -                         | 0.03 | <b>0.00</b> | 0.81     | 0.75 | 0.881 |       |       |        |       |
|                         |                                    |                           |    |                           | 0.20 | 8           | <b>0</b> | 8    | 9     |       |       |        |       |
|                         |                                    |                           |    |                           | 1    |             |          |      |       |       |       |        |       |
|                         |                                    | Inverse variance weighted | 18 | -                         | 0.08 | <b>0.00</b> | 0.70     | 0.59 | 0.837 | 0.000 |       |        |       |
|                         |                                    |                           |    | 0.35                      | 8    | <b>0</b>    | 4        | 3    |       |       |       |        |       |
|                         |                                    |                           |    | 1                         |      |             |          |      |       |       |       |        |       |
|                         |                                    | Simple mode               | 18 | -                         | 0.07 | <b>0.00</b> | 0.68     | 0.59 | 0.795 |       |       |        |       |
|                         |                                    |                           |    | 0.37                      | 5    | <b>0</b>    | 7        | 3    |       |       |       |        |       |
|                         |                                    |                           |    | 6                         |      |             |          |      |       |       |       |        |       |
|                         |                                    | Weighted mode             | 18 | -                         | 0.09 | 0.07        | 0.83     | 0.69 | 1.002 |       |       |        |       |
|                         |                                    |                           |    | 0.18                      | 5    | 0           | 3        | 2    |       |       |       |        |       |
|                         |                                    |                           |    | 3                         |      |             |          |      |       |       |       |        |       |
|                         |                                    | MR-PRESSO                 | 18 | -                         | 0.08 | <b>0.00</b> | 0.70     | 0.59 | 0.837 |       |       |        |       |
|                         |                                    |                           |    | 0.35                      | 8    | <b>1</b>    | 4        | 3    |       |       |       |        |       |
|                         |                                    |                           |    | 1                         |      |             |          |      |       |       |       |        |       |
| <b>ukb-d-30780_irnt</b> | LDL cholesterol                    | MR Egger                  | 18 | -                         | 0.89 | <b>0.02</b> | 0.10     | 0.01 | 0.578 | 0.000 | 0.030 | <0.001 | 1     |
|                         |                                    |                           |    | 2.29                      | 2    | <b>0</b>    | 1        | 8    |       |       |       |        |       |
|                         |                                    |                           |    | 5                         |      |             |          |      |       |       |       |        |       |

Supplementary Material

|                        |                  |                           |    |        |       |              |       |       |       |       |       |        |        |
|------------------------|------------------|---------------------------|----|--------|-------|--------------|-------|-------|-------|-------|-------|--------|--------|
|                        |                  | Weighted median           | 18 | -0.005 | 0.072 | 0.943        | 0.995 | 0.864 | 1.146 | 0.000 |       |        |        |
|                        |                  | Inverse variance weighted | 18 | -0.204 | 0.164 | 0.213        | 0.816 | 0.592 | 1.124 |       |       |        |        |
|                        |                  | Simple mode               | 18 | 0.044  | 0.123 | 0.724        | 1.045 | 0.821 | 1.331 |       |       |        |        |
|                        |                  | Weighted mode             | 18 | -0.003 | 0.092 | 0.977        | 0.997 | 0.832 | 1.195 |       |       |        |        |
|                        |                  | MR-PRESSO                 | 18 | -0.204 | 0.164 | 0.230        | 0.816 | 0.592 | 1.124 |       |       |        |        |
| <b>ukb-d-30870_irt</b> | Triglycerides    | MR Egger                  | 18 | -3.583 | 2.768 | 0.214        | 0.028 | 0.000 | 6.314 | 0.000 | 0.176 | <0.001 | 1      |
|                        |                  | Weighted median           | 18 | 0.209  | 0.091 | <b>0.022</b> | 1.232 | 1.031 | 1.473 |       |       |        |        |
|                        |                  | Inverse variance weighted | 18 | 0.283  | 0.464 | 0.541        | 1.328 | 0.535 | 3.294 | 0.000 |       |        |        |
|                        |                  | Simple mode               | 18 | 0.335  | 0.252 | 0.201        | 1.398 | 0.853 | 2.290 |       |       |        |        |
|                        |                  | Weighted mode             | 18 | 0.064  | 0.065 | 0.343        | 1.066 | 0.938 | 1.211 |       |       |        |        |
|                        |                  | MR-PRESSO                 | 18 | 0.283  | 0.464 | 0.549        | 1.328 | 0.535 | 3.294 |       |       |        |        |
| <b>ukb-d-30630_irt</b> | Apolipoprotein A | MR Egger                  | 18 | -0.387 | 0.327 | 0.254        | 0.679 | 0.358 | 1.288 | 0.000 | 0.646 | <0.001 | 0.343  |
|                        |                  | Weighted median           | 18 | -0.109 | 0.028 | <b>0.000</b> | 0.896 | 0.849 | 0.947 |       |       |        |        |
|                        |                  | Inverse variance weighted | 18 | -0.236 | 0.052 | <b>0.000</b> | 0.790 | 0.713 | 0.874 | 0.000 |       |        |        |
|                        |                  | Simple mode               | 18 | -0.294 | 0.051 | <b>0.000</b> | 0.746 | 0.674 | 0.824 |       |       |        |        |
|                        |                  | Weighted mode             | 18 | -0.065 | 0.039 | 0.111        | 0.937 | 0.868 | 1.011 |       |       |        |        |
|                        |                  | MR-PRESSO                 | 18 | -0.236 | 0.052 | <b>0.000</b> | 0.790 | 0.713 | 0.874 |       |       |        |        |
| <b>ukb-d-30640_irt</b> | Apolipoprotein B | MR Egger                  | 18 | -0.638 | 0.317 | <b>0.041</b> | 0.528 | 0.284 | 0.983 | 0.000 | 0.068 | <0.001 | <0.001 |
|                        |                  | Weighted median           | 18 | 0.037  | 0.022 | 0.097        | 1.038 | 0.993 | 1.085 |       |       |        |        |
|                        |                  | Inverse variance weighted | 18 | -0.025 | 0.056 | 0.655        | 0.975 | 0.874 | 1.088 | 0.000 |       |        |        |

|                                      |                              |                                         |    |                |           |                         |           |           |       |       |       |       |       |
|--------------------------------------|------------------------------|-----------------------------------------|----|----------------|-----------|-------------------------|-----------|-----------|-------|-------|-------|-------|-------|
|                                      |                              | weighte<br>d                            |    |                |           |                         |           |           |       |       |       |       |       |
|                                      |                              | Simple<br>mode                          | 18 | 0.09<br>3      | 0.03<br>0 | <b>0.00</b><br><b>6</b> | 1.09<br>8 | 1.03<br>5 | 1.163 |       |       |       |       |
|                                      |                              | Weight<br>ed<br>mode                    | 18 | 0.08<br>0      | 0.03<br>0 | <b>0.01</b><br><b>7</b> | 1.08<br>3 | 1.02<br>1 | 1.149 |       |       |       |       |
|                                      |                              | MR-<br>PRESSO                           | 18 | -<br>0.02<br>5 | 0.05<br>6 | 0.66<br>1               | 0.97<br>5 | 0.87<br>4 | 1.088 |       |       |       |       |
| <b>ukb-d-<br/>30790_irnt</b>         | Lipoprotein<br>A             | MR<br>Egger                             | 18 | 0.14<br>1      | 0.36<br>0 | 0.70<br>1               | 1.15<br>1 | 0.56<br>9 | 2.331 | 0.017 | 0.448 | 0.017 | NA*   |
|                                      |                              | Weight<br>ed<br>median                  | 18 | -<br>0.08<br>1 | 0.06<br>6 | 0.22<br>4               | 0.92<br>3 | 0.81<br>0 | 1.051 |       |       |       |       |
|                                      |                              | Inverse<br>varianc<br>e<br>weighte<br>d | 18 | -<br>0.13<br>5 | 0.05<br>8 | <b>0.01</b><br><b>9</b> | 0.87<br>3 | 0.78<br>0 | 0.978 | 0.018 |       |       |       |
|                                      |                              | Simple<br>mode                          | 18 | -<br>0.08<br>5 | 0.14<br>4 | 0.56<br>5               | 0.91<br>9 | 0.69<br>2 | 1.219 |       |       |       |       |
|                                      |                              | Weight<br>ed<br>mode                    | 18 | -<br>0.06<br>7 | 0.12<br>3 | 0.59<br>3               | 0.93<br>5 | 0.73<br>4 | 1.191 |       |       |       |       |
|                                      |                              | MR-<br>PRESSO                           | 18 | -<br>0.13<br>5 | 0.05<br>8 | <b>0.03</b><br><b>2</b> | 0.87<br>3 | 0.78<br>0 | 0.978 |       |       |       |       |
| <b>FinnGen<br/>Study</b>             |                              |                                         |    |                |           |                         |           |           |       |       |       |       |       |
| <b>finn-a-<br/>I9_K_CARDIA<br/>C</b> | Cardiovascul<br>ar mortality | MR<br>Egger                             | 18 | 1.57<br>2      | 1.77<br>5 | 0.38<br>9               | 4.81<br>7 | 0.14<br>9 | 156.1 | 0.384 | 0.498 | 0.420 |       |
|                                      |                              | Weight<br>ed<br>median                  | 18 | 0.52<br>0      | 0.39<br>6 | 0.18<br>9               | 1.68<br>2 | 0.77<br>4 | 3.656 |       |       |       |       |
|                                      |                              | Inverse<br>varianc<br>e<br>weighte<br>d | 18 | 0.35<br>9      | 0.29<br>4 | 0.22<br>1               | 1.43<br>2 | 0.80<br>6 | 2.546 | 0.419 |       |       |       |
|                                      |                              | Simple<br>mode                          | 18 | 0.54<br>6      | 0.82<br>8 | 0.51<br>8               | 1.72<br>7 | 0.34<br>1 | 8.742 |       |       |       |       |
|                                      |                              | Weight<br>ed<br>mode                    | 18 | 0.74<br>4      | 0.73<br>0 | 0.32<br>2               | 2.10<br>4 | 0.50<br>3 | 8.793 |       |       |       |       |
|                                      |                              | MR-<br>PRESSO                           | 18 | 0.35<br>9      | 0.29<br>4 | 0.23<br>8               | 1.43<br>2 | 0.80<br>6 | 2.546 |       |       |       |       |
| <b>finn-a-I9_MI</b>                  | Myocardial<br>infarction     | MR<br>Egger                             | 18 | -<br>1.22<br>0 | 2.11<br>8 | 0.57<br>3               | 0.29<br>5 | 0.00<br>5 | 18.73 | 0.005 | 0.331 | 0.003 | 0.111 |
|                                      |                              | Weight<br>ed<br>median                  | 18 | 0.70<br>3      | 0.37<br>1 | 0.05<br>8               | 2.01<br>9 | 0.97<br>6 | 4.174 |       |       |       |       |
|                                      |                              | Inverse<br>varianc<br>e<br>weighte<br>d | 18 | 0.87<br>3      | 0.35<br>6 | <b>0.01</b><br><b>4</b> | 2.39<br>3 | 1.19<br>2 | 4.805 | 0.004 |       |       |       |
|                                      |                              | Simple<br>mode                          | 18 | 0.55<br>7      | 0.72<br>7 | 0.45<br>4               | 1.74<br>6 | 0.42<br>0 | 7.262 |       |       |       |       |

|                            |                          |                           |    |        |       |              |       |       |       |       |       |        |       |
|----------------------------|--------------------------|---------------------------|----|--------|-------|--------------|-------|-------|-------|-------|-------|--------|-------|
|                            |                          | Weighted mode             | 18 | 0.576  | 0.728 | 0.440        | 1.779 | 0.427 | 7.411 |       |       |        |       |
|                            |                          | MR-PRESSO                 | 18 | 0.873  | 0.356 | <b>0.025</b> | 2.393 | 1.192 | 4.805 |       |       |        |       |
| <b>finn-a-I9_ICH</b>       | Intracranial haemorrhage | MR Egger                  | 18 | -4.098 | 2.553 | 0.128        | 0.017 | 0.000 | 2.473 | 0.726 | 0.096 | 0.596  |       |
|                            |                          | Weighted median           | 18 | 0.867  | 0.584 | 0.138        | 2.380 | 0.757 | 7.480 |       |       |        |       |
|                            |                          | Inverse variance weighted | 18 | 0.354  | 0.428 | 0.408        | 1.425 | 0.616 | 3.300 | 0.567 |       |        |       |
|                            |                          | Simple mode               | 18 | 0.858  | 1.025 | 0.414        | 2.359 | 0.317 | 17.57 |       |       |        |       |
|                            |                          | Weighted mode             | 18 | 0.878  | 0.999 | 0.392        | 2.406 | 0.339 | 100.6 |       |       |        |       |
|                            |                          | MR-PRESSO                 | 18 | 0.354  | 0.408 | 0.397        | 1.425 | 0.641 | 3.168 |       |       |        |       |
| <b>finn-a-HEARTFAIL</b>    | Heart failure            | MR Egger                  | 18 | 1.518  | 1.579 | 0.351        | 4.563 | 0.207 | 100.6 | 0.131 | 0.591 | 0.167  |       |
|                            |                          | Weighted median           | 18 | 0.574  | 0.338 | 0.089        | 1.775 | 0.916 | 3.441 |       |       |        |       |
|                            |                          | Inverse variance weighted | 18 | 0.665  | 0.259 | <b>0.010</b> | 1.945 | 1.170 | 3.234 | 0.155 |       |        |       |
|                            |                          | Simple mode               | 18 | 0.846  | 0.691 | 0.237        | 2.330 | 0.602 | 9.018 |       |       |        |       |
|                            |                          | Weighted mode             | 18 | 0.526  | 0.726 | 0.479        | 1.692 | 0.407 | 7.026 |       |       |        |       |
|                            |                          | MR-PRESSO                 | 18 | 0.665  | 0.259 | <b>0.020</b> | 1.945 | 1.170 | 3.234 |       |       |        |       |
| <b>finn-a-I9_ISCHHEART</b> | Ischemic heart disease   | MR Egger                  | 18 | -1.985 | 1.948 | 0.324        | 0.137 | 0.003 | 6.261 | 0.000 | 0.186 | <0.001 | 0.438 |
|                            |                          | Weighted median           | 18 | 0.577  | 0.294 | <b>0.049</b> | 1.781 | 1.002 | 3.167 |       |       |        |       |
|                            |                          | Inverse variance weighted | 18 | 0.669  | 0.336 | <b>0.046</b> | 1.952 | 1.011 | 3.771 | 0.000 |       |        |       |
|                            |                          | Simple mode               | 18 | 0.984  | 0.733 | 0.197        | 2.674 | 0.636 | 11.25 |       |       |        |       |
|                            |                          | Weighted mode             | 18 | 1.018  | 0.756 | 0.196        | 2.767 | 0.629 | 12.17 |       |       |        |       |
|                            |                          | MR-PRESSO                 | 18 | 0.669  | 0.336 | 0.063        | 1.952 | 1.011 | 3.771 |       |       |        |       |
| <b>finn-a-I9_CORATHERR</b> | Coronary atherosclerosis | MR Egger                  | 18 | -1.342 | 1.972 | 0.506        | 0.261 | 0.005 | 12.46 | 0.000 | 0.299 | <0.001 | 0.305 |



|                              |                                    |                           |    |        |       |              |       |       |       |       |       |        |       |
|------------------------------|------------------------------------|---------------------------|----|--------|-------|--------------|-------|-------|-------|-------|-------|--------|-------|
|                              |                                    | Weighted median           | 18 | 0.783  | 0.329 | <b>0.017</b> | 2.188 | 1.149 | 4.170 |       |       |        |       |
|                              |                                    | Inverse variance weighted | 18 | 0.745  | 0.332 | <b>0.025</b> | 2.106 | 1.097 | 4.040 | 0.000 |       |        |       |
|                              |                                    | Simple mode               | 18 | 1.015  | 0.680 | 0.154        | 2.760 | 0.728 | 10.45 |       |       |        |       |
|                              |                                    | Weighted mode             | 18 | 1.120  | 0.641 | 0.099        | 3.066 | 0.873 | 10.76 |       |       |        |       |
|                              |                                    | MR-PRESSO                 | 18 | 0.745  | 0.332 | <b>0.039</b> | 2.106 | 1.097 | 4.040 |       |       |        |       |
| <b>finn-a-I9_CHD</b>         | Major coronary heart disease event | MR Egger                  | 18 | -2.990 | 1.935 | 0.142        | 0.050 | 0.001 | 2.233 | 0.000 | 0.085 | <0.001 | 0.244 |
|                              |                                    | Weighted median           | 18 | 0.608  | 0.337 | 0.071        | 1.837 | 0.949 | 3.554 |       |       |        |       |
|                              |                                    | Inverse variance weighted | 18 | 0.517  | 0.347 | 0.137        | 1.676 | 0.849 | 3.309 | 0.000 |       |        |       |
|                              |                                    | Simple mode               | 18 | 1.261  | 0.722 | 0.099        | 3.527 | 0.857 | 14.52 |       |       |        |       |
|                              |                                    | Weighted mode             | 18 | 1.104  | 0.778 | 0.174        | 3.015 | 0.657 | 13.84 |       |       |        |       |
|                              |                                    | MR-PRESSO                 | 18 | 0.517  | 0.347 | 0.155        | 1.676 | 0.849 | 3.309 |       |       |        |       |
| <b>finn-a-I9_PAD</b>         | Peripheral artery disease          | MR Egger                  | 18 | -1.732 | 2.180 | 0.438        | 0.177 | 0.002 | 12.67 | 0.052 | 0.246 | 0.048  | NA*   |
|                              |                                    | Weighted median           | 18 | 1.079  | 0.420 | <b>0.010</b> | 2.941 | 1.292 | 6.697 |       |       |        |       |
|                              |                                    | Inverse variance weighted | 18 | 0.855  | 0.371 | <b>0.021</b> | 2.351 | 1.136 | 4.865 | 0.039 |       |        |       |
|                              |                                    | Simple mode               | 18 | 1.024  | 0.630 | 0.123        | 2.784 | 0.809 | 9.578 |       |       |        |       |
|                              |                                    | Weighted mode             | 18 | 1.044  | 0.588 | 0.094        | 2.840 | 0.897 | 8.987 |       |       |        |       |
|                              |                                    | MR-PRESSO                 | 18 | 0.855  | 0.371 | <b>0.034</b> | 2.351 | 1.136 | 4.865 |       |       |        |       |
| <b>finn-a-I9_HYPTENS ESS</b> | Essential hypertension             | MR Egger                  | 18 | -0.101 | 1.806 | 0.956        | 0.904 | 0.026 | 31.15 | 0.000 | 0.556 | <0.001 | 0.364 |
|                              |                                    | Weighted median           | 18 | 1.363  | 0.259 | <b>0.000</b> | 3.908 | 2.351 | 6.498 |       |       |        |       |
|                              |                                    | Inverse variance weighted | 18 | 0.969  | 0.297 | <b>0.001</b> | 2.634 | 1.471 | 4.719 | 0.000 |       |        |       |

|                          |                                    |                           |    |                |           |                         |           |           |       |       |       |       |     |
|--------------------------|------------------------------------|---------------------------|----|----------------|-----------|-------------------------|-----------|-----------|-------|-------|-------|-------|-----|
|                          |                                    | Simple mode               | 18 | 1.60<br>4      | 0.37<br>0 | <b>0.00</b><br><b>0</b> | 4.97<br>3 | 2.41<br>0 | 10.26 |       |       |       |     |
|                          |                                    | Weighted mode             | 18 | 1.60<br>4      | 0.49<br>3 | <b>0.00</b><br><b>5</b> | 4.97<br>3 | 1.89<br>1 | 13.07 |       |       |       |     |
|                          |                                    | MR-PRESSO                 | 18 | 0.96<br>9      | 0.29<br>7 | <b>0.00</b><br><b>5</b> | 2.63<br>4 | 1.47<br>1 | 4.719 |       |       |       |     |
| <b>finn-a-C_STROKE</b>   | Stroke                             | MR Egger                  | 18 | -<br>2.53<br>9 | 1.28<br>2 | 0.06<br>5               | 0.07<br>9 | 0.00<br>6 | 0.973 | 0.244 | 0.024 | 0.075 |     |
|                          |                                    | Weighted median           | 18 | 0.38<br>4      | 0.28<br>2 | 0.17<br>4               | 1.46<br>7 | 0.84<br>4 | 2.552 |       |       |       |     |
|                          |                                    | Inverse variance weighted | 18 | 0.61<br>7      | 0.24<br>6 | <b>0.01</b><br><b>2</b> | 1.85<br>3 | 1.14<br>4 | 3.004 | 0.057 |       |       |     |
|                          |                                    | Simple mode               | 18 | 0.28<br>4      | 0.50<br>6 | 0.58<br>2               | 1.32<br>9 | 0.49<br>3 | 3.583 |       |       |       |     |
|                          |                                    | Weighted mode             | 18 | 0.23<br>8      | 0.49<br>2 | 0.63<br>5               | 1.26<br>8 | 0.48<br>4 | 3.326 |       |       |       |     |
|                          |                                    | MR-PRESSO                 | 18 | 0.61<br>7      | 0.24<br>6 | <b>0.02</b><br><b>3</b> | 1.85<br>3 | 1.14<br>4 | 3.004 |       |       |       |     |
| <b>finn-a-I9_STR_EXH</b> | Ischemic stroke                    | MR Egger                  | 18 | 0.13<br>6      | 1.39<br>6 | 0.92<br>3               | 1.14<br>6 | 0.07<br>4 | 17.67 | 0.645 | 0.648 | 0.703 |     |
|                          |                                    | Weighted median           | 18 | 0.79<br>1      | 0.32<br>1 | <b>0.01</b><br><b>4</b> | 2.20<br>5 | 1.17<br>6 | 4.134 |       |       |       |     |
|                          |                                    | Inverse variance weighted | 18 | 0.77<br>7      | 0.23<br>4 | <b>0.00</b><br><b>1</b> | 2.17<br>5 | 1.37<br>4 | 3.441 | 0.696 |       |       |     |
|                          |                                    | Simple mode               | 18 | 0.97<br>0      | 0.56<br>7 | 0.10<br>5               | 2.63<br>8 | 0.86<br>8 | 8.016 |       |       |       |     |
|                          |                                    | Weighted mode             | 18 | 0.86<br>4      | 0.52<br>5 | 0.11<br>8               | 2.37<br>3 | 0.84<br>8 | 6.640 |       |       |       |     |
|                          |                                    | MR-PRESSO                 | 18 | 0.77<br>7      | 0.20<br>9 | <b>0.00</b><br><b>2</b> | 2.17<br>5 | 1.44<br>3 | 3.278 |       |       |       |     |
| <b>finn-a-I9_AF</b>      | Atrial fibrillation and fluttering | MR Egger                  | 18 | 1.93<br>8      | 1.85<br>3 | 0.31<br>1               | 6.94<br>4 | 0.18<br>4 | 262.3 | 0.023 | 0.495 | 0.027 | NA* |
|                          |                                    | Weighted median           | 18 | 0.62<br>4      | 0.35<br>9 | 0.08<br>2               | 1.86<br>6 | 0.92<br>3 | 3.774 |       |       |       |     |
|                          |                                    | Inverse variance weighted | 18 |                |           |                         |           |           |       |       |       |       |     |
|                          |                                    | Simple mode               | 18 | 0.63<br>6      | 0.67<br>7 | 0.36<br>1               | 1.88<br>8 | 0.50<br>1 | 7.114 |       |       |       |     |
|                          |                                    | Weighted mode             | 18 | 0.68<br>5      | 0.64<br>5 | 0.30<br>3               | 1.98<br>4 | 0.56<br>0 | 7.022 |       |       |       |     |
|                          |                                    | MR-PRESSO                 | 18 | 0.66<br>1      | 0.30<br>6 | <b>0.04</b><br><b>6</b> | 1.93<br>7 | 1.06<br>2 | 3.531 |       |       |       |     |

The Global Lipids

| Genetics Consortium |                 |                           |      |             |      |             |       |      |       |       |       |        |       |  |
|---------------------|-----------------|---------------------------|------|-------------|------|-------------|-------|------|-------|-------|-------|--------|-------|--|
| ieu-a-299           | HDL cholesterol | MR Egger                  | 18   | -           | 1.33 | 0.66        | 0.55  | 0.04 | 7.603 | 0.000 | 0.772 | <0.001 | 0.513 |  |
|                     |                 |                           |      | 0.58        | 5    | 6           | 6     | 1    |       |       |       |        |       |  |
|                     |                 |                           |      | 7           |      |             |       |      |       |       |       |        |       |  |
|                     |                 | Weighted median           | 18   | -           | 0.12 | <b>0.00</b> | 0.41  | 0.32 | 0.532 |       |       |        |       |  |
|                     |                 |                           |      | 0.87        | 4    | <b>0</b>    | 8     | 8    |       |       |       |        |       |  |
|                     |                 |                           |      | 3           |      |             |       |      |       |       |       |        |       |  |
|                     |                 | Inverse variance weighted | 18   | -           | 0.21 | <b>0.00</b> | 0.37  | 0.24 | 0.575 | 0.000 |       |        |       |  |
|                     |                 | 0.97                      | 6    | <b>0</b>    | 7    | 7           |       |      |       |       |       |        |       |  |
|                     |                 | 6                         |      |             |      |             |       |      |       |       |       |        |       |  |
| Simple mode         | 18              | -                         | 0.23 | <b>0.00</b> | 0.33 | 0.21        | 0.528 |      |       |       |       |        |       |  |
|                     |                 | 1.09                      | 4    | <b>0</b>    | 3    | 0           |       |      |       |       |       |        |       |  |
|                     |                 | 9                         |      |             |      |             |       |      |       |       |       |        |       |  |
| Weighted mode       | 18              | -                         | 0.23 | <b>0.00</b> | 0.43 | 0.27        | 0.697 |      |       |       |       |        |       |  |
|                     |                 | 0.82                      | 9    | <b>3</b>    | 7    | 4           |       |      |       |       |       |        |       |  |
|                     |                 | 9                         |      |             |      |             |       |      |       |       |       |        |       |  |
| MR-PRESSO           | 18              | -                         | 0.21 | <b>0.00</b> | 0.37 | 0.24        | 0.575 |      |       |       |       |        |       |  |
|                     |                 | 0.97                      | 6    | <b>0</b>    | 7    | 7           |       |      |       |       |       |        |       |  |
|                     |                 | 6                         |      |             |      |             |       |      |       |       |       |        |       |  |
| ieu-a-300           | LDL cholesterol | MR Egger                  | 18   | -           | 1.22 | <b>0.03</b> | 0.06  | 0.00 | 0.681 | 0.000 | 0.046 | <0.001 | 0.001 |  |
|                     |                 |                           |      | 2.78        | 6    | <b>7</b>    | 2     | 6    |       |       |       |        |       |  |
|                     |                 |                           |      | 6           |      |             |       |      |       |       |       |        |       |  |
|                     |                 | Weighted median           | 18   | -           | 0.11 | 0.98        | 0.99  | 0.79 | 1.246 |       |       |        |       |  |
|                     |                 |                           |      | 0.00        | 3    | 6           | 8     | 9    |       |       |       |        |       |  |
|                     |                 |                           |      | 2           |      |             |       |      |       |       |       |        |       |  |
|                     |                 | Inverse variance weighted | 18   | -           | 0.22 | 0.44        | 0.84  | 0.54 | 1.305 | 0.000 |       |        |       |  |
|                     |                 | 0.17                      | 4    | 1           | 2    | 3           |       |      |       |       |       |        |       |  |
|                     |                 | 2                         |      |             |      |             |       |      |       |       |       |        |       |  |
| Simple mode         | 18              | 0.12                      | 0.17 | 0.46        | 1.13 | 0.81        | 1.591 |      |       |       |       |        |       |  |
|                     |                 | 7                         | 2    | 9           | 6    | 1           |       |      |       |       |       |        |       |  |
|                     |                 |                           |      |             |      |             |       |      |       |       |       |        |       |  |
| Weighted mode       | 18              | 0.09                      | 0.13 | 0.50        | 1.09 | 0.84        | 1.414 |      |       |       |       |        |       |  |
|                     |                 | 0                         | 1    | 1           | 4    | 7           |       |      |       |       |       |        |       |  |
|                     |                 |                           |      |             |      |             |       |      |       |       |       |        |       |  |
| MR-PRESSO           | 18              | -                         | 0.22 | 0.45        | 0.84 | 0.54        | 1.305 |      |       |       |       |        |       |  |
|                     |                 | 0.17                      | 4    | 2           | 2    | 3           |       |      |       |       |       |        |       |  |
|                     |                 | 2                         |      |             |      |             |       |      |       |       |       |        |       |  |
| ieu-a-302           | Triglycerides   | MR Egger                  | 18   | -           | 2.85 | 0.35        | 0.06  | 0.00 | 18.01 | 0.000 | 0.306 | <0.001 | 1     |  |
|                     |                 |                           |      | 2.71        | 8    | 7           | 6     | 0    |       |       |       |        |       |  |
|                     |                 |                           |      | 1           |      |             |       |      |       |       |       |        |       |  |
|                     |                 | Weighted median           | 18   | 0.66        | 0.11 | <b>0.00</b> | 1.94  | 1.56 | 2.415 |       |       |        |       |  |
|                     |                 |                           |      | 5           | 1    | <b>0</b>    | 4     | 6    |       |       |       |        |       |  |
|                     |                 |                           |      |             |      |             |       |      |       |       |       |        |       |  |
|                     |                 | Inverse variance weighted | 18   | 0.27        | 0.47 | 0.56        | 1.31  | 0.51 | 3.308 | 0.000 |       |        |       |  |
|                     |                 | 1                         | 2    | 6           | 1    | 9           |       |      |       |       |       |        |       |  |
|                     |                 |                           |      |             |      |             |       |      |       |       |       |        |       |  |
| Simple mode         | 18              | 0.69                      | 0.27 | <b>0.02</b> | 1.99 | 1.16        | 3.407 |      |       |       |       |        |       |  |
|                     |                 | 1                         | 3    | <b>2</b>    | 5    | 8           |       |      |       |       |       |        |       |  |
|                     |                 |                           |      |             |      |             |       |      |       |       |       |        |       |  |
| Weighted mode       | 18              | 0.52                      | 0.21 | <b>0.02</b> | 1.68 | 1.11        | 2.536 |      |       |       |       |        |       |  |
|                     |                 | 0                         | 0    | <b>4</b>    | 1    | 5           |       |      |       |       |       |        |       |  |
|                     |                 |                           |      |             |      |             |       |      |       |       |       |        |       |  |
| MR-PRESSO           | 18              | 0.27                      | 0.47 | 0.57        | 1.31 | 0.51        | 3.308 |      |       |       |       |        |       |  |
|                     |                 | 1                         | 2    | 4           | 1    | 9           |       |      |       |       |       |        |       |  |
|                     |                 |                           |      |             |      |             |       |      |       |       |       |        |       |  |

\*No significant outliers

**Table S7** The causal effect of genetically predicted HbA<sub>1c</sub> on outcomes in different studies.

| ID of outcome      | Outcome                  | Methods                   | No. of SNPs | Beta   | SE    | $\rho$ value | OR    | LCI   | UCI   | Heterogeneity $\rho$ value | $\rho$ value for intercept | $\rho$ value for MR-PRESSO | Distortion test $\rho$ value |
|--------------------|--------------------------|---------------------------|-------------|--------|-------|--------------|-------|-------|-------|----------------------------|----------------------------|----------------------------|------------------------------|
| ukb-d-I9_K_CARDIAC | Cardiovascular mortality | MR Egger                  | 34          | -0.001 | 0.003 | 0.723        | 0.999 | 0.993 | 1.005 | 0.792                      | 0.162                      | 0.504                      |                              |
|                    |                          | Weighted median           | 34          | 0.001  | 0.002 | 0.560        | 1.001 | 0.997 | 1.006 |                            |                            |                            |                              |
|                    |                          | Inverse variance weighted | 34          | 0.002  | 0.002 | 0.124        | 1.002 | 0.999 | 1.006 | 0.743                      |                            |                            |                              |
|                    |                          | Simple mode               | 34          | 0.005  | 0.004 | 0.228        | 1.005 | 0.997 | 1.014 |                            |                            |                            |                              |
|                    |                          | Weighted mode             | 34          | 0.000  | 0.002 | 0.973        | 1.000 | 0.995 | 1.005 |                            |                            |                            |                              |
| ieu-a-798          | Myocardial infarction    | MR Egger                  | 34          | 0.531  | 0.511 | 0.306        | 1.701 | 0.625 | 4.627 | 0.000                      | 0.520                      | <0.001                     | 0.537                        |
|                    |                          | Weighted median           | 34          | 0.389  | 0.169 | <b>0.021</b> | 1.475 | 1.059 | 2.055 |                            |                            |                            |                              |
|                    |                          | Inverse variance weighted | 34          | 0.222  | 0.110 | <b>0.043</b> | 1.249 | 1.007 | 1.550 | 0.000                      |                            |                            |                              |
|                    |                          | Simple mode               | 34          | 0.271  | 0.279 | 0.338        | 1.311 | 0.759 | 2.266 |                            |                            |                            |                              |
|                    |                          | Weighted mode             | 34          | 0.302  | 0.189 | 0.119        | 1.353 | 0.934 | 1.959 |                            |                            |                            |                              |
| ukb-d-I9_INTRACRAA | Intracranial haemorrhage | MR Egger                  | 34          | -0.001 | 0.003 | 0.604        | 0.999 | 0.994 | 1.004 | 0.783                      | 0.885                      | 0.811                      |                              |
|                    |                          | Weighted median           | 34          | 0.000  | 0.002 | 0.910        | 1.000 | 0.996 | 1.004 |                            |                            |                            |                              |
|                    |                          | Inverse variance weighted | 34          | -0.001 | 0.001 | 0.464        | 0.999 | 0.996 | 1.002 | 0.818                      |                            |                            |                              |
|                    |                          | Simple mode               | 34          | -0.003 | 0.003 | 0.310        | 0.997 | 0.990 | 1.003 |                            |                            |                            |                              |
|                    |                          | Weighted mode             | 34          | -0.001 | 0.002 | 0.696        | 0.999 | 0.995 | 1.003 |                            |                            |                            |                              |
| ebi-a-GCST009541   | Heart failure            | MR Egger                  | 31          | 0.266  | 0.251 | 0.299        | 1.304 | 0.797 | 2.134 | 0.000                      | 0.075                      | <0.001                     | 0.839                        |
|                    |                          | MR-PRESSO                 | 34          | -0.001 | 0.001 | 0.485        | 0.999 | 0.997 | 1.002 |                            |                            |                            |                              |
|                    |                          | Weighted median           | 34          | 0.000  | 0.002 | 0.910        | 1.000 | 0.996 | 1.004 |                            |                            |                            |                              |
|                    |                          | Inverse variance weighted | 34          | -0.001 | 0.001 | 0.464        | 0.999 | 0.996 | 1.002 | 0.818                      |                            |                            |                              |
|                    |                          | Simple mode               | 34          | -0.003 | 0.003 | 0.310        | 0.997 | 0.990 | 1.003 |                            |                            |                            |                              |

|                           |                                    |                           |    |        |       |              |       |       |       |       |       |        |       |
|---------------------------|------------------------------------|---------------------------|----|--------|-------|--------------|-------|-------|-------|-------|-------|--------|-------|
|                           |                                    | Weighted median           | 31 | 0.002  | 0.133 | 0.988        | 1.002 | 0.772 | 1.301 |       |       |        |       |
|                           |                                    | Inverse variance weighted | 31 | -0.120 | 0.145 | 0.408        | 0.887 | 0.667 | 1.179 | 0.000 |       |        |       |
|                           |                                    | Simple mode               | 31 | -0.263 | 0.202 | 0.203        | 0.768 | 0.517 | 1.142 |       |       |        |       |
|                           |                                    | Weighted mode             | 31 | -0.017 | 0.130 | 0.898        | 0.983 | 0.763 | 1.268 |       |       |        |       |
|                           |                                    | MR-PRESSO                 | 31 | -0.120 | 0.141 | 0.400        | 0.887 | 0.673 | 1.169 |       |       |        |       |
| <b>ieu-a-7</b>            | Ischemic heart disease             | MR Egger                  | 34 | 0.533  | 0.241 | 0.055        | 1.704 | 1.062 | 2.733 | 0.625 | 0.286 | <0.001 | 0.309 |
|                           |                                    | Weighted median           | 34 | 0.319  | 0.127 | <b>0.012</b> | 1.376 | 1.072 | 1.765 |       |       |        |       |
|                           |                                    | Inverse variance weighted | 34 | 0.283  | 0.099 | <b>0.004</b> | 1.327 | 1.094 | 1.611 | 0.590 |       |        |       |
|                           |                                    | Simple mode               | 34 | 0.294  | 0.196 | 0.165        | 1.342 | 0.913 | 1.973 |       |       |        |       |
|                           |                                    | Weighted mode             | 34 | 0.322  | 0.152 | 0.061        | 1.380 | 1.024 | 1.860 |       |       |        |       |
|                           |                                    | MR-PRESSO                 | 34 | 0.353  | 0.195 | 0.079        | 1.423 | 0.970 | 2.087 |       |       |        |       |
| <b>ukb-d-I9_CORATHE R</b> | Coronary atherosclerosis           | MR Egger                  | 34 | 0.004  | 0.013 | 0.744        | 1.004 | 0.980 | 1.030 | 0.000 | 0.467 | 0.102  |       |
|                           |                                    | Weighted median           | 34 | 0.011  | 0.006 | 0.063        | 1.011 | 0.999 | 1.024 |       |       |        |       |
|                           |                                    | Inverse variance weighted | 34 | 0.019  | 0.006 | <b>0.001</b> | 1.019 | 1.008 | 1.031 | 0.000 |       |        |       |
|                           |                                    | Simple mode               | 34 | 0.015  | 0.011 | 0.205        | 1.015 | 0.993 | 1.038 |       |       |        |       |
|                           |                                    | Weighted mode             | 34 | 0.012  | 0.006 | 0.068        | 1.012 | 1.000 | 1.025 |       |       |        |       |
|                           |                                    | MR-PRESSO                 | 34 | 0.015  | 0.006 | <b>0.018</b> | 1.015 | 1.003 | 1.026 |       |       |        |       |
| <b>ukb-d-I9_CHD</b>       | Major coronary heart disease event | MR Egger                  | 34 | -0.007 | 0.011 | 0.513        | 0.993 | 0.971 | 1.015 | 0.000 | 0.955 | <0.001 | 0.305 |
|                           |                                    | Weighted median           | 34 | -0.012 | 0.006 | 0.059        | 0.988 | 0.976 | 1.000 |       |       |        |       |
|                           |                                    | Inverse variance weighted | 34 | -0.007 | 0.006 | 0.255        | 0.993 | 0.981 | 1.005 | 0.000 |       |        |       |
|                           |                                    | Simple mode               | 34 | 0.022  | 0.013 | 0.084        | 1.023 | 0.998 | 1.048 |       |       |        |       |

|                         |                           |                           |    |        |       |              |       |       |       |       |       |        |       |
|-------------------------|---------------------------|---------------------------|----|--------|-------|--------------|-------|-------|-------|-------|-------|--------|-------|
|                         |                           | Weighted mode             | 34 | -0.013 | 0.007 | 0.068        | 0.987 | 0.973 | 1.001 |       |       |        |       |
|                         |                           | MR-PRESSO                 | 34 | -0.001 | 0.005 | 0.805        | 0.999 | 0.989 | 1.008 |       |       |        |       |
| <b>bbj-a-144</b>        | Peripheral artery disease | MR Egger                  | 28 | 0.911  | 1.184 | 0.449        | 2.486 | 0.244 | 25.32 | 0.027 | 0.522 | 0.021  | NA*   |
|                         |                           | Weighted median           | 28 | 0.776  | 0.556 | 0.163        | 2.172 | 0.731 | 6.455 |       |       |        |       |
|                         |                           | Inverse variance weighted | 28 | 0.200  | 0.447 | 0.654        | 1.222 | 0.508 | 2.937 | 0.031 |       |        |       |
|                         |                           | Simple mode               | 28 | 1.803  | 0.940 | 0.066        | 6.066 | 0.961 | 38.30 |       |       |        |       |
|                         |                           | Weighted mode             | 28 | 1.020  | 0.618 | 0.110        | 2.773 | 0.826 | 9.310 |       |       |        |       |
|                         |                           | MR-PRESSO                 | 28 | 0.231  | 0.393 | 0.561        | 1.260 | 0.583 | 2.722 |       |       |        |       |
| <b>ukb-b-12493</b>      | Essential hypertension    | MR Egger                  | 34 | 0.013  | 0.034 | 0.700        | 1.013 | 0.948 | 1.083 | 0.000 | 0.686 | <0.001 | 0.562 |
|                         |                           | Weighted median           | 34 | 0.030  | 0.010 | <b>0.005</b> | 1.030 | 1.009 | 1.051 |       |       |        |       |
|                         |                           | Inverse variance weighted | 34 | 0.002  | 0.018 | 0.929        | 1.002 | 0.966 | 1.038 | 0.000 |       |        |       |
|                         |                           | Simple mode               | 34 | 0.027  | 0.015 | 0.082        | 1.027 | 0.998 | 1.057 |       |       |        |       |
|                         |                           | Weighted mode             | 34 | 0.027  | 0.010 | <b>0.012</b> | 1.027 | 1.007 | 1.047 |       |       |        |       |
|                         |                           | MR-PRESSO                 | 34 | 0.022  | 0.009 | <b>0.023</b> | 1.022 | 1.004 | 1.041 |       |       |        |       |
| <b>ebi-a-GCST006906</b> | Stroke                    | MR Egger                  | 33 | -0.173 | 0.302 | 0.571        | 0.841 | 0.465 | 1.521 | 0.000 | 0.920 | <0.001 | 0.304 |
|                         |                           | Weighted median           | 33 | -0.043 | 0.145 | 0.769        | 0.958 | 0.721 | 1.273 |       |       |        |       |
|                         |                           | Inverse variance weighted | 33 | -0.148 | 0.162 | 0.362        | 0.863 | 0.628 | 1.185 | 0.000 |       |        |       |
|                         |                           | Simple mode               | 33 | -0.187 | 0.276 | 0.503        | 0.829 | 0.482 | 1.426 |       |       |        |       |
|                         |                           | Weighted mode             | 33 | -0.120 | 0.159 | 0.456        | 0.887 | 0.649 | 1.211 |       |       |        |       |
|                         |                           | MR-PRESSO                 | 33 | -0.088 | 0.151 | 0.562        | 0.916 | 0.682 | 1.230 |       |       |        |       |
| <b>ebi-a-GCST006908</b> | Ischemic stroke           | MR Egger                  | 33 | -0.141 | 0.345 | 0.686        | 0.869 | 0.442 | 1.708 | 0.000 | 0.946 | <0.001 | 0.259 |

|                         |                                    |                           |    |        |       |              |       |       |       |       |       |        |        |
|-------------------------|------------------------------------|---------------------------|----|--------|-------|--------------|-------|-------|-------|-------|-------|--------|--------|
|                         |                                    | Weighted median           | 33 | -0.052 | 0.167 | 0.756        | 0.949 | 0.684 | 1.318 |       |       |        |        |
|                         |                                    | Inverse variance weighted | 33 | -0.161 | 0.185 | 0.384        | 0.851 | 0.593 | 1.223 | 0.000 |       |        |        |
|                         |                                    | Simple mode               | 33 | -0.031 | 0.287 | 0.915        | 0.970 | 0.552 | 1.702 |       |       |        |        |
|                         |                                    | Weighted mode             | 33 | -0.107 | 0.172 | 0.539        | 0.899 | 0.642 | 1.258 |       |       |        |        |
|                         |                                    | MR-PRESSO                 | 33 | -0.092 | 0.172 | 0.597        | 0.912 | 0.651 | 1.278 |       |       |        |        |
| <b>ebi-a-GCST006414</b> | Atrial fibrillation and fluttering | MR Egger                  | 33 | -0.043 | 0.176 | 0.810        | 0.958 | 0.679 | 1.352 | 0.002 | 0.883 | 0.008  | 0.733  |
|                         |                                    | Weighted median           | 33 | -0.096 | 0.105 | 0.358        | 0.908 | 0.739 | 1.115 |       |       |        |        |
|                         |                                    | Inverse variance weighted | 33 | -0.064 | 0.093 | 0.490        | 0.938 | 0.781 | 1.126 | 0.003 |       |        |        |
|                         |                                    | Simple mode               | 33 | -0.148 | 0.177 | 0.410        | 0.862 | 0.609 | 1.221 |       |       |        |        |
|                         |                                    | Weighted mode             | 33 | -0.102 | 0.115 | 0.384        | 0.903 | 0.721 | 1.132 |       |       |        |        |
|                         |                                    | MR-PRESSO                 | 33 | -0.091 | 0.085 | 0.295        | 0.913 | 0.773 | 1.080 |       |       |        |        |
| <b>ukb-d-30760_irt</b>  | HDL cholesterol                    | MR Egger                  | 34 | 0.070  | 0.060 | 0.252        | 1.072 | 0.953 | 1.206 | 0.000 | 0.204 | <0.001 | 0.894  |
|                         |                                    | Weighted median           | 34 | 0.023  | 0.015 | 0.114        | 1.024 | 0.994 | 1.054 |       |       |        |        |
|                         |                                    | Inverse variance weighted | 34 | 0.005  | 0.033 | 0.885        | 1.005 | 0.941 | 1.072 | 0.000 |       |        |        |
|                         |                                    | Simple mode               | 34 | 0.033  | 0.023 | 0.154        | 1.034 | 0.989 | 1.081 |       |       |        |        |
|                         |                                    | Weighted mode             | 34 | 0.025  | 0.014 | 0.081        | 1.025 | 0.998 | 1.053 |       |       |        |        |
|                         |                                    | MR-PRESSO                 | 34 | 0.000  | 0.030 | 0.997        | 1.000 | 0.943 | 1.061 |       |       |        |        |
| <b>ukb-d-30780_irt</b>  | LDL cholesterol                    | MR Egger                  | 34 | 0.307  | 0.184 | 0.104        | 1.360 | 0.949 | 1.949 | 0.000 | 0.436 | <0.001 | <0.001 |
|                         |                                    | Weighted median           | 34 | 0.171  | 0.037 | <b>0.000</b> | 1.186 | 1.102 | 1.276 |       |       |        |        |
|                         |                                    | Inverse variance weighted | 34 | 0.186  | 0.021 | <b>0.000</b> | 1.205 | 1.157 | 1.255 | 0.000 |       |        |        |
|                         |                                    | Simple mode               | 34 | 0.048  | 0.072 | 0.514        | 1.049 | 0.910 | 1.209 |       |       |        |        |

Supplementary Material

|                         |                  |                           |    |        |       |              |       |       |       |       |       |        |        |
|-------------------------|------------------|---------------------------|----|--------|-------|--------------|-------|-------|-------|-------|-------|--------|--------|
|                         |                  | Weighted mode             | 34 | 0.140  | 0.034 | <b>0.000</b> | 1.150 | 1.076 | 1.230 |       |       |        |        |
|                         |                  | MR-PRESSO                 | 34 | 0.169  | 0.095 | 0.085        | 1.184 | 0.982 | 1.426 |       |       |        |        |
| <b>ukb-d-30870_irtt</b> | Triglycerides    | MR Egger                  | 34 | -0.129 | 0.126 | 0.315        | 0.879 | 0.686 | 1.126 | 0.000 | 0.069 | <0.001 | <0.001 |
|                         |                  | Weighted median           | 34 | -0.023 | 0.039 | 0.564        | 0.978 | 0.906 | 1.056 |       |       |        |        |
|                         |                  | Inverse variance weighted | 34 | 0.070  | 0.072 | 0.329        | 1.073 | 0.932 | 1.235 | 0.000 |       |        |        |
|                         |                  | Simple mode               | 34 | 0.051  | 0.064 | 0.436        | 1.052 | 0.928 | 1.193 |       |       |        |        |
|                         |                  | Weighted mode             | 34 | -0.009 | 0.032 | 0.779        | 0.991 | 0.930 | 1.056 |       |       |        |        |
|                         |                  | MR-PRESSO                 | 34 | 0.121  | 0.076 | 0.121        | 1.129 | 0.972 | 1.310 |       |       |        |        |
| <b>ukb-d-30630_irtt</b> | Apolipoprotein A | MR Egger                  | 34 | 0.037  | 0.041 | 0.364        | 1.038 | 0.959 | 1.124 | 0.000 | 0.150 | <0.001 | 0.791  |
|                         |                  | Weighted median           | 34 | 0.005  | 0.011 | 0.670        | 1.005 | 0.983 | 1.026 |       |       |        |        |
|                         |                  | Inverse variance weighted | 34 | -0.013 | 0.023 | 0.573        | 0.987 | 0.944 | 1.032 | 0.000 |       |        |        |
|                         |                  | Simple mode               | 34 | 0.001  | 0.018 | 0.935        | 1.001 | 0.967 | 1.037 |       |       |        |        |
|                         |                  | Weighted mode             | 34 | 0.001  | 0.010 | 0.881        | 1.001 | 0.983 | 1.021 |       |       |        |        |
|                         |                  | MR-PRESSO                 | 34 | -0.012 | 0.021 | 0.575        | 0.988 | 0.949 | 1.030 |       |       |        |        |
| <b>ukb-d-30640_irtt</b> | Apolipoprotein B | MR Egger                  | 34 | 0.071  | 0.042 | 0.097        | 1.074 | 0.990 | 1.165 | 0.000 | 0.637 | <0.001 | <0.001 |
|                         |                  | Weighted median           | 34 | 0.045  | 0.010 | <b>0.000</b> | 1.046 | 1.025 | 1.067 |       |       |        |        |
|                         |                  | Inverse variance weighted | 34 | 0.055  | 0.022 | <b>0.015</b> | 1.056 | 1.011 | 1.104 | 0.000 |       |        |        |
|                         |                  | Simple mode               | 34 | 0.033  | 0.020 | 0.096        | 1.034 | 0.995 | 1.074 |       |       |        |        |
|                         |                  | Weighted mode             | 34 | 0.040  | 0.009 | <b>0.000</b> | 1.041 | 1.022 | 1.060 |       |       |        |        |
|                         |                  | MR-PRESSO                 | 34 | 0.051  | 0.022 | <b>0.024</b> | 1.053 | 1.009 | 1.099 |       |       |        |        |
| <b>ukb-d-30790_irtt</b> | Lipoprotein A    | MR Egger                  | 34 | 0.018  | 0.055 | 0.749        | 1.018 | 0.913 | 1.134 | 0.195 | 0.713 | 0.005  | 0.072  |
|                         |                  | Weighted median           | 34 | 0.017  | 0.043 | 0.690        | 1.017 | 0.935 | 1.107 |       |       |        |        |
|                         |                  | Inverse variance          | 34 | 0.001  | 0.030 | 0.983        | 1.001 | 0.944 | 1.061 | 0.225 |       |        |        |



|                     |              |          |    |         |      |      |      |      |      |       |  |       |       |
|---------------------|--------------|----------|----|---------|------|------|------|------|------|-------|--|-------|-------|
|                     |              |          |    | weighte |      |      |      |      |      |       |  |       |       |
|                     |              |          |    | d       |      |      |      |      |      |       |  |       |       |
|                     |              | Simple   | 34 | -       | 0.07 | 0.76 | 0.97 | 0.84 | 1.12 |       |  |       |       |
|                     |              | mode     |    | 0.02    | 3    | 3    | 8    | 7    | 9    |       |  |       |       |
|                     |              |          |    | 2       |      |      |      |      |      |       |  |       |       |
|                     |              | Weight   | 34 | 0.02    | 0.04 | 0.62 | 1.02 | 0.94 | 1.10 |       |  |       |       |
|                     |              | ed       |    | 0       | 2    | 8    | 1    | 0    | 8    |       |  |       |       |
|                     |              | mode     |    |         |      |      |      |      |      |       |  |       |       |
|                     |              | MR-      | 34 |         |      |      |      |      |      |       |  |       |       |
|                     |              | PRESSO   |    |         |      |      |      |      |      |       |  |       |       |
| <b>FinnGen</b>      |              |          |    |         |      |      |      |      |      |       |  |       |       |
| <b>Study</b>        |              |          |    |         |      |      |      |      |      |       |  |       |       |
| <b>finn-a-</b>      | Cardiovascul | MR       | 31 | 0.01    | 0.39 | 0.97 | 1.01 | 0.46 | 2.19 | 0.829 |  | 0.466 | 0.486 |
| <b>I9_K_CARDIA</b>  | ar mortality | Egger    |    | 4       | 4    | 1    | 4    | 9    | 4    |       |  |       |       |
| <b>C</b>            |              |          |    |         |      |      |      |      |      |       |  |       |       |
|                     |              | Weight   | 31 | -       | 0.29 | 0.69 | 0.89 | 0.50 | 1.58 |       |  |       |       |
|                     |              | ed       |    | 0.11    | 5    | 8    | 2    | 1    | 9    |       |  |       |       |
|                     |              | median   |    | 4       |      |      |      |      |      |       |  |       |       |
|                     |              | Inverse  | 31 | -       | 0.20 | 0.26 | 0.79 | 0.52 | 1.19 | 0.842 |  |       |       |
|                     |              | variance |    | 0.23    | 8    | 4    | 3    | 7    | 2    |       |  |       |       |
|                     |              | weighte  |    | 2       |      |      |      |      |      |       |  |       |       |
|                     |              | d        |    |         |      |      |      |      |      |       |  |       |       |
|                     |              | Simple   | 31 | -       | 0.47 | 0.79 | 0.88 | 0.34 | 2.23 |       |  |       |       |
|                     |              | mode     |    | 0.12    | 5    | 0    | 0    | 7    | 2    |       |  |       |       |
|                     |              |          |    | 8       |      |      |      |      |      |       |  |       |       |
|                     |              | Weight   | 31 | 0.02    | 0.32 | 0.93 | 1.02 | 0.54 | 1.92 |       |  |       |       |
|                     |              | ed       |    | 7       | 1    | 3    | 8    | 8    | 6    |       |  |       |       |
|                     |              | mode     |    |         |      |      |      |      |      |       |  |       |       |
|                     |              | MR-      | 31 | -       | 0.19 | 0.53 | 0.88 | 0.60 | 1.29 |       |  |       |       |
|                     |              | PRESSO   |    | 0.12    | 3    | 3    | 5    | 6    | 4    |       |  |       |       |
|                     |              |          |    | 2       |      |      |      |      |      |       |  |       |       |
| <b>finn-a-I9_MI</b> | Myocardial   | MR       | 31 | 0.46    | 0.45 | 0.32 | 1.58 | 0.64 | 3.87 | 0.002 |  | 0.338 | 0.001 |
|                     | infarction   | Egger    |    | 0       | 6    | 1    | 5    | 8    | 7    |       |  |       | 0.108 |
|                     |              |          |    |         |      |      |      |      |      |       |  |       |       |
|                     |              | Weight   | 31 | 0.29    | 0.25 | 0.25 | 1.34 | 0.81 | 2.22 |       |  |       |       |
|                     |              | ed       |    | 6       | 8    | 1    | 5    | 1    | 9    |       |  |       |       |
|                     |              | median   |    |         |      |      |      |      |      |       |  |       |       |
|                     |              | Inverse  | 31 | 0.08    | 0.24 | 0.72 | 1.08 | 0.67 | 1.74 | 0.002 |  |       |       |
|                     |              | variance |    | 4       | 2    | 9    | 7    | 7    | 6    |       |  |       |       |
|                     |              | weighte  |    |         |      |      |      |      |      |       |  |       |       |
|                     |              | d        |    |         |      |      |      |      |      |       |  |       |       |
|                     |              | Simple   | 31 | 0.23    | 0.41 | 0.57 | 1.26 | 0.56 | 2.85 |       |  |       |       |
|                     |              | mode     |    | 5       | 5    | 5    | 5    | 1    | 3    |       |  |       |       |
|                     |              | Weight   | 31 | 0.32    | 0.26 | 0.23 | 1.38 | 0.81 | 2.33 |       |  |       |       |
|                     |              | ed       |    | 5       | 8    | 5    | 3    | 9    | 7    |       |  |       |       |
|                     |              | mode     |    |         |      |      |      |      |      |       |  |       |       |
|                     |              | MR-      | 31 | 0.00    | 0.22 | 0.97 | 1.00 | 0.65 | 1.56 |       |  |       |       |
|                     |              | PRESSO   |    | 8       | 4    | 0    | 9    | 1    | 3    |       |  |       |       |
| <b>finn-a-</b>      | Intracranial | MR       | 31 | -       | 0.58 | 0.41 | 0.61 | 0.19 | 1.93 | 0.819 |  | 0.712 | 0.741 |
| <b>I9_ICH</b>       | haemorrhage  | Egger    |    | 0.48    | 2    | 3    | 7    | 7    | 1    |       |  |       |       |
|                     |              |          |    | 3       |      |      |      |      |      |       |  |       |       |
|                     |              | Weight   | 31 | -       | 0.47 | 0.46 | 0.70 | 0.27 | 1.80 |       |  |       |       |
|                     |              | ed       |    | 0.34    | 8    | 7    | 6    | 7    | 3    |       |  |       |       |
|                     |              | median   |    | 8       |      |      |      |      |      |       |  |       |       |
|                     |              | Inverse  | 31 | -       | 0.30 | 0.33 | 0.74 | 0.40 | 1.35 | 0.847 |  |       |       |
|                     |              | variance |    | 0.29    | 9    | 2    | 2    | 5    | 8    |       |  |       |       |
|                     |              | weighte  |    | 9       |      |      |      |      |      |       |  |       |       |
|                     |              | d        |    |         |      |      |      |      |      |       |  |       |       |
|                     |              | Simple   | 31 | -       | 0.85 | 0.29 | 0.40 | 0.07 | 2.13 |       |  |       |       |
|                     |              | mode     |    | 0.90    | 0    | 4    | 3    | 6    | 3    |       |  |       |       |
|                     |              |          |    | 9       |      |      |      |      |      |       |  |       |       |
|                     |              | Weight   | 31 | -       | 0.51 | 0.53 | 0.72 | 0.26 | 1.98 |       |  |       |       |
|                     |              | ed       |    | 0.32    | 7    | 1    | 1    | 2    | 5    |       |  |       |       |
|                     |              | mode     |    | 8       |      |      |      |      |      |       |  |       |       |

|                            |                                    |                           |    |      |      |      |      |      |      |       |       |        |       |
|----------------------------|------------------------------------|---------------------------|----|------|------|------|------|------|------|-------|-------|--------|-------|
|                            |                                    | MR-PRESSO                 | 31 | -    | 0.26 | 0.28 | 0.75 | 0.44 | 1.26 |       |       |        |       |
|                            |                                    |                           |    | 0.28 | 3    | 6    | 2    | 9    | 0    |       |       |        |       |
|                            |                                    |                           |    | 5    |      |      |      |      |      |       |       |        |       |
| <b>finn-a-HEARTFAIL</b>    | Heart failure                      | MR Egger                  | 31 | 0.11 | 0.39 | 0.78 | 1.11 | 0.51 | 2.41 | 0.012 | 0.349 | 0.005  | 0.173 |
|                            |                                    |                           |    | 0    | 3    | 3    | 6    | 6    | 2    |       |       |        |       |
|                            |                                    | Weighted median           | 31 | 0.11 | 0.23 | 0.64 | 1.11 | 0.70 | 1.77 |       |       |        |       |
|                            |                                    |                           |    | 0    | 8    | 4    | 6    | 1    | 8    |       |       |        |       |
|                            |                                    | Inverse variance weighted | 31 | -    | 0.20 | 0.31 | 0.81 | 0.54 | 1.22 | 0.011 |       |        |       |
|                            |                                    |                           |    | 0.20 | 9    | 9    | 2    | 0    | 2    |       |       |        |       |
|                            |                                    |                           |    | 8    |      |      |      |      |      |       |       |        |       |
|                            |                                    | Simple mode               | 31 | 0.26 | 0.37 | 0.48 | 1.30 | 0.62 | 2.72 |       |       |        |       |
|                            |                                    |                           |    | 5    | 5    | 6    | 3    | 4    | 0    |       |       |        |       |
|                            |                                    | Weighted mode             | 31 | 0.09 | 0.24 | 0.71 | 1.09 | 0.67 | 1.77 |       |       |        |       |
|                            |                                    |                           |    | 1    | 6    | 5    | 5    | 6    | 5    |       |       |        |       |
|                            |                                    | MR-PRESSO                 | 31 | -    | 0.19 | 0.32 | 0.82 | 0.55 | 1.21 |       |       |        |       |
|                            |                                    |                           |    | 0.19 | 9    | 7    | 0    | 5    | 2    |       |       |        |       |
|                            |                                    |                           |    | 8    |      |      |      |      |      |       |       |        |       |
| <b>finn-a-I9_ISCHHEART</b> | Ischemic heart disease             | MR Egger                  | 31 | 0.16 | 0.36 | 0.66 | 1.17 | 0.57 | 2.38 | 0.000 | 0.853 | <0.001 | 0.151 |
|                            |                                    |                           |    | 0    | 3    | 3    | 3    | 6    | 8    |       |       |        |       |
|                            |                                    | Weighted median           | 31 | 0.10 | 0.17 | 0.54 | 1.11 | 0.79 | 1.56 |       |       |        |       |
|                            |                                    |                           |    | 6    | 3    | 0    | 2    | 2    | 2    |       |       |        |       |
|                            |                                    | Inverse variance weighted | 31 | 0.10 | 0.18 | 0.59 | 1.10 | 0.76 | 1.60 | 0.000 |       |        |       |
|                            |                                    |                           |    | 2    | 9    | 0    | 8    | 4    | 5    |       |       |        |       |
|                            |                                    |                           |    |      |      |      |      |      |      |       |       |        |       |
|                            |                                    | Simple mode               | 31 | 0.24 | 0.29 | 0.40 | 1.28 | 0.72 | 2.27 |       |       |        |       |
|                            |                                    |                           |    | 9    | 2    | 0    | 2    | 4    | 1    |       |       |        |       |
|                            |                                    | Weighted mode             | 31 | 0.20 | 0.17 | 0.24 | 1.22 | 0.87 | 1.72 |       |       |        |       |
|                            |                                    |                           |    | 4    | 3    | 9    | 6    | 3    | 2    |       |       |        |       |
|                            |                                    | MR-PRESSO                 | 31 | 0.03 | 0.17 | 0.85 | 1.03 | 0.72 | 1.46 |       |       |        |       |
|                            |                                    |                           |    | 3    | 9    | 5    | 3    | 8    | 8    |       |       |        |       |
| <b>finn-a-I9_CORATHERR</b> | Coronary atherosclerosis           | MR Egger                  | 31 | 0.25 | 0.44 | 0.57 | 1.28 | 0.54 | 3.05 | 0.000 | 0.604 | <0.001 | 0.065 |
|                            |                                    |                           |    | 0    | 2    | 6    | 4    | 0    | 5    |       |       |        |       |
|                            |                                    | Weighted median           | 31 | 0.13 | 0.20 | 0.50 | 1.14 | 0.76 | 1.71 |       |       |        |       |
|                            |                                    |                           |    | 7    | 5    | 5    | 7    | 7    | 5    |       |       |        |       |
|                            |                                    | Inverse variance weighted | 31 | 0.05 | 0.23 | 0.81 | 1.05 | 0.67 | 1.66 | 0.000 |       |        |       |
|                            |                                    |                           |    | 4    | 2    | 7    | 5    | 0    | 2    |       |       |        |       |
|                            |                                    |                           |    |      |      |      |      |      |      |       |       |        |       |
|                            |                                    | Simple mode               | 31 | 0.26 | 0.32 | 0.42 | 1.30 | 0.68 | 2.49 |       |       |        |       |
|                            |                                    |                           |    | 7    | 9    | 3    | 6    | 5    | 0    |       |       |        |       |
|                            |                                    | Weighted mode             | 31 | 0.18 | 0.19 | 0.35 | 1.20 | 0.81 | 1.77 |       |       |        |       |
|                            |                                    |                           |    | 5    | 7    | 4    | 4    | 8    | 0    |       |       |        |       |
|                            |                                    | MR-PRESSO                 | 31 | -    | 0.22 | 0.97 | 0.99 | 0.64 | 1.52 |       |       |        |       |
|                            |                                    |                           |    | 0.00 | 0    | 0    | 2    | 5    | 5    |       |       |        |       |
|                            |                                    |                           |    | 8    |      |      |      |      |      |       |       |        |       |
| <b>finn-a-I9_CHD</b>       | Major coronary heart disease event | MR Egger                  | 31 | 0.40 | 0.40 | 0.32 | 1.49 | 0.67 | 3.27 | 0.000 | 0.412 | <0.001 | 0.739 |
|                            |                                    |                           |    | 0    | 2    | 8    | 2    | 9    | 9    |       |       |        |       |
|                            |                                    | Weighted median           | 31 | 0.39 | 0.21 | 0.06 | 1.48 | 0.98 | 2.24 |       |       |        |       |
|                            |                                    |                           |    | 7    | 1    | 0    | 7    | 3    | 9    |       |       |        |       |

|                              |                           |                           |    |        |       |              |       |       |       |       |       |        |       |
|------------------------------|---------------------------|---------------------------|----|--------|-------|--------------|-------|-------|-------|-------|-------|--------|-------|
|                              |                           | Inverse variance weighted | 31 | 0.116  | 0.212 | 0.583        | 1.123 | 0.741 | 1.702 | 0.000 |       |        |       |
|                              |                           | Simple mode               | 31 | 0.288  | 0.339 | 0.402        | 1.334 | 0.687 | 2.591 |       |       |        |       |
|                              |                           | Weighted mode             | 31 | 0.312  | 0.216 | 0.158        | 1.366 | 0.895 | 2.085 |       |       |        |       |
|                              |                           | MR-PRESSO                 | 31 | 0.013  | 0.205 | 0.952        | 1.013 | 0.678 | 1.513 |       |       |        |       |
| <b>finn-a-I9_PAD</b>         | Peripheral artery disease | MR Egger                  | 31 | 0.525  | 0.550 | 0.347        | 1.691 | 0.576 | 4.965 | 0.001 | 0.424 | 0.003  | 0.081 |
|                              |                           | Weighted median           | 31 | 0.241  | 0.299 | 0.419        | 1.273 | 0.709 | 2.286 |       |       |        |       |
|                              |                           | Inverse variance weighted | 31 | 0.148  | 0.290 | 0.610        | 1.160 | 0.657 | 2.048 | 0.001 |       |        |       |
|                              |                           | Simple mode               | 31 | 0.403  | 0.465 | 0.393        | 1.496 | 0.602 | 3.718 |       |       |        |       |
|                              |                           | Weighted mode             | 31 | 0.294  | 0.301 | 0.336        | 1.342 | 0.744 | 2.422 |       |       |        |       |
|                              |                           | MR-PRESSO                 | 31 | 0.167  | 0.260 | 0.525        | 1.182 | 0.710 | 1.966 |       |       |        |       |
| <b>finn-a-I9_HYPTENSE SS</b> | Essential hypertension    | MR Egger                  | 31 | -0.038 | 0.473 | 0.936        | 0.963 | 0.381 | 2.433 | 0.000 | 0.701 | <0.001 | 0.422 |
|                              |                           | Weighted median           | 31 | -0.128 | 0.191 | 0.504        | 0.880 | 0.605 | 1.280 |       |       |        |       |
|                              |                           | Inverse variance weighted | 31 | -0.194 | 0.248 | 0.435        | 0.824 | 0.507 | 1.339 | 0.000 |       |        |       |
|                              |                           | Simple mode               | 31 | -0.064 | 0.293 | 0.827        | 0.938 | 0.528 | 1.664 |       |       |        |       |
|                              |                           | Weighted mode             | 31 | -0.090 | 0.199 | 0.656        | 0.914 | 0.619 | 1.351 |       |       |        |       |
|                              |                           | MR-PRESSO                 | 31 | -0.216 | 0.238 | 0.371        | 0.806 | 0.505 | 1.286 |       |       |        |       |
| <b>finn-a-C_STROKE</b>       | Stroke                    | MR Egger                  | 31 | -0.423 | 0.424 | 0.326        | 0.655 | 0.285 | 1.503 | 0.000 | 0.451 | <0.001 | 0.487 |
|                              |                           | Weighted median           | 31 | -0.316 | 0.242 | 0.192        | 0.729 | 0.453 | 1.172 |       |       |        |       |
|                              |                           | Inverse variance weighted | 31 | -0.149 | 0.224 | 0.506        | 0.862 | 0.555 | 1.336 | 0.000 |       |        |       |
|                              |                           | Simple mode               | 31 | 0.649  | 0.522 | 0.223        | 1.914 | 0.688 | 5.318 |       |       |        |       |
|                              |                           | Weighted mode             | 31 | -0.452 | 0.216 | <b>0.045</b> | 0.637 | 0.417 | 0.972 |       |       |        |       |

|                                                  |                                    |                           |    |       |      |             |      |      |      |       |       |        |       |
|--------------------------------------------------|------------------------------------|---------------------------|----|-------|------|-------------|------|------|------|-------|-------|--------|-------|
|                                                  |                                    | MR-PRESSO                 | 31 | -0.09 | 0.20 | 0.65        | 0.91 | 0.61 | 1.36 |       |       |        |       |
|                                                  |                                    |                           |    | 1     | 3    | 6           | 3    | 3    | 0    |       |       |        |       |
| <b>finn-a-I9_STR_EXH</b>                         | Ischemic stroke                    | MR Egger                  | 31 | -0.32 | 0.41 | 0.45        | 0.72 | 0.32 | 1.64 | 0.008 | 0.803 | 0.010  | 0.279 |
|                                                  |                                    |                           |    | 1     | 8    | 0           | 6    | 0    | 7    |       |       |        |       |
|                                                  |                                    | Weighted median           | 31 | -0.34 | 0.27 | 0.21        | 0.70 | 0.41 | 1.21 |       |       |        |       |
|                                                  |                                    |                           |    | 5     | 6    | 1           | 8    | 2    | 6    |       |       |        |       |
|                                                  |                                    | Inverse variance weighted | 31 | -0.23 | 0.21 | 0.29        | 0.79 | 0.51 | 1.21 | 0.011 |       |        |       |
|                                                  |                                    |                           |    | 1     | 9    | 0           | 4    | 7    | 8    |       |       |        |       |
|                                                  |                                    | Simple mode               | 31 | -0.45 | 0.47 | 0.34        | 0.63 | 0.25 | 1.60 |       |       |        |       |
|                                                  |                                    |                           |    | 1     | 0    | 5           | 7    | 3    | 2    |       |       |        |       |
|                                                  |                                    | Weighted mode             | 31 | -0.40 | 0.26 | 0.14        | 0.66 | 0.39 | 1.13 |       |       |        |       |
|                                                  |                                    |                           |    | 3     | 8    | 3           | 8    | 5    | 0    |       |       |        |       |
|                                                  |                                    | MR-PRESSO                 | 31 | -0.13 | 0.19 | 0.49        | 0.87 | 0.59 | 1.28 |       |       |        |       |
|                                                  |                                    |                           |    | 6     | 6    | 2           | 2    | 4    | 2    |       |       |        |       |
| <b>finn-a-I9_AF</b>                              | Atrial fibrillation and fluttering | MR Egger                  | 31 | 0.24  | 0.51 | 0.63        | 1.27 | 0.46 | 3.50 | 0.000 | 0.193 | <0.001 | 0.84  |
|                                                  |                                    |                           |    | 4     | 5    | 9           | 7    | 5    | 5    |       |       |        |       |
|                                                  |                                    | Weighted median           | 31 | 0.21  | 0.25 | 0.40        | 1.23 | 0.75 | 2.02 |       |       |        |       |
|                                                  |                                    |                           |    | 1     | 3    | 3           | 5    | 3    | 6    |       |       |        |       |
|                                                  |                                    | Inverse variance weighted | 31 | -0.33 | 0.27 | 0.22        | 0.71 | 0.41 | 1.23 | 0.000 |       |        |       |
|                                                  |                                    |                           |    | 7     | 7    | 4           | 4    | 5    | 0    |       |       |        |       |
|                                                  |                                    | Simple mode               | 31 | 0.34  | 0.44 | 0.45        | 1.40 | 0.58 | 3.39 |       |       |        |       |
|                                                  |                                    |                           |    | 2     | 9    | 2           | 7    | 4    | 2    |       |       |        |       |
|                                                  |                                    | Weighted mode             | 31 | 0.19  | 0.24 | 0.43        | 1.21 | 0.74 | 1.97 |       |       |        |       |
|                                                  |                                    |                           |    | 5     | 8    | 7           | 6    | 8    | 5    |       |       |        |       |
|                                                  |                                    | MR-PRESSO                 | 31 | -0.40 | 0.26 | 0.13        | 0.66 | 0.40 | 1.11 |       |       |        |       |
|                                                  |                                    |                           |    | 5     | 1    | 0           | 7    | 0    | 3    |       |       |        |       |
| <b>The Global Lipids and Genetics Consortium</b> |                                    |                           |    |       |      |             |      |      |      |       |       |        |       |
| <b>ieu-a-299</b>                                 | HDL cholesterol                    | MR Egger                  | 33 | 0.24  | 0.19 | 0.20        | 1.28 | 0.88 | 1.86 | 0.000 | 0.266 | <0.001 | 0.584 |
|                                                  |                                    |                           |    | 8     | 1    | 5           | 1    | 0    | 4    |       |       |        |       |
|                                                  |                                    | Weighted median           | 33 | 0.14  | 0.05 | <b>0.00</b> | 1.16 | 1.03 | 1.29 |       |       |        |       |
|                                                  |                                    |                           |    | 8     | 6    | <b>8</b>    | 0    | 9    | 4    |       |       |        |       |
|                                                  |                                    | Inverse variance weighted | 33 | 0.05  | 0.09 | 0.53        | 1.06 | 0.88 | 1.28 | 0.000 |       |        |       |
|                                                  |                                    |                           |    | 9     | 6    | 4           | 1    | 0    | 0    |       |       |        |       |
|                                                  |                                    | Simple mode               | 33 | 0.13  | 0.07 | 0.07        | 1.14 | 0.99 | 1.32 |       |       |        |       |
|                                                  |                                    |                           |    | 7     | 5    | 7           | 7    | 0    | 8    |       |       |        |       |
|                                                  |                                    | Weighted mode             | 33 | 0.14  | 0.05 | <b>0.01</b> | 1.16 | 1.04 | 1.29 |       |       |        |       |
|                                                  |                                    |                           |    | 8     | 6    | <b>2</b>    | 0    | 0    | 3    |       |       |        |       |
|                                                  |                                    | MR-PRESSO                 | 33 | 0.04  | 0.09 | 0.66        | 1.04 | 0.87 | 1.24 |       |       |        |       |
|                                                  |                                    |                           |    | 0     | 1    | 2           | 1    | 1    | 3    |       |       |        |       |
| <b>ieu-a-300</b>                                 | LDL cholesterol                    | MR Egger                  | 33 | 0.24  | 0.32 | 0.45        | 1.27 | 0.67 | 2.40 | 0.000 | 0.969 | <0.001 | 0.748 |
|                                                  |                                    |                           |    | 5     | 3    | 3           | 8    | 9    | 8    |       |       |        |       |

|                  |                           |          |        |       |              |       |       |       |       |       |        |       |
|------------------|---------------------------|----------|--------|-------|--------------|-------|-------|-------|-------|-------|--------|-------|
|                  | Weighted median           | 33       | 0.185  | 0.069 | <b>0.007</b> | 1.204 | 1.052 | 1.378 |       |       |        |       |
|                  | Inverse variance weighted | 33       | 0.234  | 0.158 | 0.137        | 1.264 | 0.928 | 1.721 | 0.000 |       |        |       |
|                  | Simple mode               | 33       | 0.062  | 0.118 | 0.602        | 1.064 | 0.844 | 1.341 |       |       |        |       |
|                  | Weighted mode             | 33       | 0.146  | 0.072 | 0.052        | 1.157 | 1.004 | 1.333 |       |       |        |       |
|                  | MR-PRESSO                 | 33       | 0.188  | 0.142 | 0.196        | 1.206 | 0.913 | 1.595 |       |       |        |       |
| <b>ieu-a-302</b> | Triglycerides             | MR Egger | -0.235 | 0.145 | 0.117        | 0.791 | 0.595 | 1.052 | 0.000 | 0.121 | <0.001 | 0.314 |
|                  | Weighted median           | 33       | -0.109 | 0.059 | 0.062        | 0.896 | 0.799 | 1.006 |       |       |        |       |
|                  | Inverse variance weighted | 33       | -0.034 | 0.075 | 0.646        | 0.966 | 0.834 | 1.119 | 0.000 |       |        |       |
|                  | Simple mode               | 33       | -0.066 | 0.099 | 0.512        | 0.936 | 0.771 | 1.138 |       |       |        |       |
|                  | Weighted mode             | 33       | -0.104 | 0.060 | 0.095        | 0.902 | 0.801 | 1.014 |       |       |        |       |
|                  | MR-PRESSO                 | 33       | 0.014  | 0.076 | 0.853        | 1.014 | 0.874 | 1.178 |       |       |        |       |

\*No significant outliers

**Table S8** HDL-C as a mediator in the causal pathway between T2DM and risk of CVDs

| Outcome                            | Total effect | Direct effect | Mediation effect | Mediation proportion (95% CI) |
|------------------------------------|--------------|---------------|------------------|-------------------------------|
| Cardiovascular mortality           | 0.056        | 0.049         | 0.0071           | 12.8% (-0.4%, 39.3%)          |
| <b>Myocardial infarction</b>       | 0.134        | 0.138         | -0.0044          | <b>7.4% (0.8%, 20.6%)</b>     |
| Intracerebral hemorrhage           | 0.078        | 0.077         | 0.0003           | 0.4% (-9.2%, 29.0%)           |
| Ischemic heart disease             | 0.114        | 0.113         | 0.0003           | 0.2% (-6.3%, 19.1%)           |
| <b>Coronary atherosclerosis</b>    | 0.118        | 0.103         | 0.0152           | <b>12.8% (2.4%, 31.0%)</b>    |
| Major coronary heart disease event | 0.103        | 0.089         | 0.0139           | 13.5% (2.4%, 33.2%)           |
| <b>Peripheral artery disease</b>   | 0.183        | 0.164         | 0.0195           | <b>10.6% (2.4%, 24.6%)</b>    |
| <b>Essential hypertension</b>      | 0.122        | 0.115         | 0.0072           | <b>5.9% (0.2%, 17.3%)</b>     |
| Stroke                             | 0.099        | 0.093         | 0.006            | 6.1% (-0.5%, 19.6%)           |
| Ischemic stroke                    | 0.063        | 0.057         | 0.0052           | 8.4% (-1.8%, 30.2%)           |

**Table S9** Triglycerides as a mediator in the causal pathway between T2DM and risk of CVDs

| Outcome | Total effect | Direct effect | Mediation effect | Mediation proportion (95% CI) |
|---------|--------------|---------------|------------------|-------------------------------|
|---------|--------------|---------------|------------------|-------------------------------|

|                                    |       |       |         |                            |
|------------------------------------|-------|-------|---------|----------------------------|
| Cardiovascular mortality           | 0.056 | 0.056 | 0.0004  | 0.7% (-1.9%, 24.2%)        |
| <b>Myocardial infarction</b>       | 0.134 | 0.118 | 0.0158  | <b>11.9% (1.1%, 31.2%)</b> |
| Intracerebral hemorrhage           | 0.078 | 0.075 | 0.0026  | 3.3% (-1.9%, 35.0%)        |
| Ischemic heart disease             | 0.114 | 0.105 | 0.0084  | 7.4% (-19.0%, 53.0%)       |
| Coronary atherosclerosis           | 0.118 | 0.108 | 0.0100  | 8.5% (-21.6%, 60.5%)       |
| Major coronary heart disease event | 0.103 | 0.093 | 0.0095  | 9.2% (-6.2%, 35.5%)        |
| <b>Peripheral artery disease</b>   | 0.183 | 0.171 | 0.0122  | <b>6.7% (0.2%, 21.6%)</b>  |
| <b>Essential hypertension</b>      | 0.122 | 0.113 | 0.0089  | <b>7.3% (0.4%, 22.2%)</b>  |
| Stroke                             | 0.099 | 0.095 | 0.0033  | 3.4% (-0.3%, 15.8%)        |
| Ischemic stroke                    | 0.063 | 0.064 | -0.0013 | -2.0% (-1.9%, 15.3%)       |

**Table S10** ApoA as a mediator in the causal pathway between T2DM and risk of CVDs

| Outcome                                   | Total effect | Direct effect | Mediation effect | Mediation proportion (95% CI) |
|-------------------------------------------|--------------|---------------|------------------|-------------------------------|
| Cardiovascular mortality                  | 0.056        | 0.054         | 0.0017           | 3.0% (-5.9%, 18.3%)           |
| <b>Myocardial infarction</b>              | 0.134        | 0.125         | 0.0088           | <b>6.6% (1.2%, 14.9%)</b>     |
| Intracerebral hemorrhage                  | 0.078        | 0.081         | -0.0038          | -4.9% (-14.0%, 12.8%)         |
| <b>Ischemic heart disease</b>             | 0.114        | 0.104         | 0.0097           | <b>8.5% (2.3%, 17.8%)</b>     |
| <b>Coronary atherosclerosis</b>           | 0.118        | 0.108         | 0.0104           | <b>8.8% (2.2%, 18.8%)</b>     |
| <b>Major coronary heart disease event</b> | 0.103        | 0.093         | 0.0103           | <b>10.0% (2.6%, 21.0%)</b>    |
| <b>Peripheral artery disease</b>          | 0.183        | 0.173         | 0.01             | <b>5.5% (1.0%, 12.3%)</b>     |
| Essential hypertension                    | 0.122        | 0.121         | 0.0016           | 1.3% (-1.9%, 6.8%)            |
| <b>Stroke</b>                             | 0.099        | 0.092         | 0.0064           | <b>6.5% (1.0%, 14.9%)</b>     |
| Ischemic stroke                           | 0.063        | 0.057         | 0.0054           | 8.5% (-0.2%, 22.5%)           |

**Table S11** Multivariable Mendelian randomization using IVW method.

| Outcome                         | Exposure          | No. of SNPs | Beta  | SE    | OR    | LCI   | UCI   | <i>p</i> value |
|---------------------------------|-------------------|-------------|-------|-------|-------|-------|-------|----------------|
| <b>Cardiovascular mortality</b> | T2DM              | 80          | 0.001 | 0.000 | 1.001 | 1.000 | 1.001 | <b>0.031</b>   |
|                                 | HbA <sub>1c</sub> | 6           | 0.000 | 0.001 | 1.000 | 0.997 | 1.002 | 0.779          |
|                                 | FG                | 27          | 0.003 | 0.001 | 1.003 | 1.001 | 1.005 | <b>0.006</b>   |
|                                 | FI                | 11          | 0.002 | 0.002 | 1.002 | 0.997 | 1.007 | 0.374          |
| <b>Myocardial infarction</b>    | T2DM              | 80          | 0.135 | 0.038 | 1.144 | 1.062 | 1.233 | <b>0.000</b>   |
|                                 | HbA <sub>1c</sub> | 6           | 0.193 | 0.244 | 1.213 | 0.752 | 1.957 | 0.428          |
|                                 | FG                | 27          | -     | 0.174 | 0.916 | 0.651 | 1.289 | 0.615          |
|                                 | FI                | 11          | 0.109 | 0.311 | 1.115 | 0.606 | 2.052 | 0.727          |

|                                           |                   |    |       |       |       |       |       |              |
|-------------------------------------------|-------------------|----|-------|-------|-------|-------|-------|--------------|
| <b>Intracranial haemorrhage</b>           | T2DM              | 80 | 0.000 | 0.000 | 1.000 | 0.999 | 1.000 | 0.707        |
|                                           | HbA <sub>1c</sub> | 6  | 0.001 | 0.002 | 1.001 | 0.998 | 1.004 | 0.606        |
|                                           | FG                | 27 | -     | 0.001 | 0.998 | 0.996 | 1.000 | 0.107        |
|                                           |                   |    | 0.002 |       |       |       |       |              |
|                                           | FI                | 11 | 0.002 | 0.002 | 1.002 | 0.998 | 1.007 | 0.351        |
| <b>Heart failure</b>                      | T2DM              | 75 | 0.037 | 0.023 | 1.037 | 0.991 | 1.086 | 0.114        |
|                                           | HbA <sub>1c</sub> | 5  | -     | 0.142 | 0.835 | 0.631 | 1.104 | 0.205        |
|                                           |                   |    | 0.181 |       |       |       |       |              |
|                                           | FG                | 26 | 0.206 | 0.115 | 1.228 | 0.980 | 1.540 | 0.075        |
|                                           | FI                | 11 | -     | 0.188 | 0.795 | 0.550 | 1.150 | 0.224        |
|                                           |                   |    | 0.229 |       |       |       |       |              |
| <b>Ischemic heart disease</b>             | T2DM              | 80 | 0.160 | 0.038 | 1.173 | 1.089 | 1.263 | <b>0.000</b> |
|                                           | HbA <sub>1c</sub> | 6  | 0.119 | 0.242 | 1.127 | 0.702 | 1.809 | 0.621        |
|                                           | FG                | 27 | -     | 0.172 | 0.966 | 0.689 | 1.354 | 0.842        |
|                                           |                   |    | 0.034 |       |       |       |       |              |
|                                           | FI                | 11 | 0.248 | 0.308 | 1.281 | 0.701 | 2.343 | 0.421        |
| <b>Coronary atherosclerosis</b>           | T2DM              | 80 | 0.006 | 0.002 | 1.006 | 1.002 | 1.009 | <b>0.002</b> |
|                                           | HbA <sub>1c</sub> | 6  | 0.011 | 0.011 | 1.011 | 0.990 | 1.033 | 0.310        |
|                                           | FG                | 27 | 0.003 | 0.008 | 1.003 | 0.987 | 1.019 | 0.698        |
|                                           | FI                | 11 | 0.002 | 0.015 | 1.002 | 0.973 | 1.032 | 0.902        |
| <b>Major coronary heart disease event</b> | T2DM              | 80 | 0.006 | 0.002 | 1.006 | 1.002 | 1.009 | <b>0.002</b> |
|                                           | HbA <sub>1c</sub> | 6  | 0.011 | 0.011 | 1.011 | 0.990 | 1.033 | 0.310        |
|                                           | FG                | 27 | 0.003 | 0.008 | 1.003 | 0.987 | 1.019 | 0.698        |
|                                           | FI                | 11 | 0.002 | 0.015 | 1.002 | 0.973 | 1.032 | 0.902        |
| <b>Peripheral artery disease</b>          | T2DM              | 75 | 0.300 | 0.067 | 1.350 | 1.184 | 1.540 | <b>0.000</b> |
|                                           | HbA <sub>1c</sub> | 4  | 0.537 | 0.446 | 1.712 | 0.714 | 4.102 | 0.228        |
|                                           | FG                | 25 | -     | 0.348 | 0.717 | 0.363 | 1.418 | 0.339        |
|                                           |                   |    | 0.332 |       |       |       |       |              |
|                                           | FI                | 11 | 1.092 | 0.496 | 2.980 | 1.128 | 7.871 | <b>0.028</b> |
| <b>Essential hypertension</b>             | T2DM              | 80 | 0.013 | 0.002 | 1.013 | 1.009 | 1.017 | <b>0.000</b> |
|                                           | HbA <sub>1c</sub> | 6  | 0.015 | 0.013 | 1.015 | 0.989 | 1.042 | 0.250        |
|                                           | FG                | 27 | -     | 0.010 | 0.982 | 0.963 | 1.001 | 0.063        |
|                                           |                   |    | 0.018 |       |       |       |       |              |
|                                           | FI                | 11 | 0.071 | 0.018 | 1.074 | 1.036 | 1.113 | <b>0.000</b> |
| <b>Stroke</b>                             | T2DM              | 80 | 0.122 | 0.022 | 1.129 | 1.082 | 1.179 | <b>0.000</b> |

|                                           |                   |    |       |       |       |       |       |              |
|-------------------------------------------|-------------------|----|-------|-------|-------|-------|-------|--------------|
|                                           | HbA <sub>1c</sub> | 6  | -     | 0.134 | 0.882 | 0.678 | 1.148 | 0.351        |
|                                           |                   |    | 0.125 |       |       |       |       |              |
|                                           | FG                | 27 | -     | 0.099 | 0.948 | 0.781 | 1.151 | 0.588        |
|                                           |                   |    | 0.054 |       |       |       |       |              |
|                                           | FI                | 11 | -     | 0.178 | 0.969 | 0.683 | 1.374 | 0.861        |
|                                           |                   |    | 0.031 |       |       |       |       |              |
| <b>Ischemic stroke</b>                    | T2DM              | 80 | 0.130 | 0.022 | 1.139 | 1.090 | 1.190 | <b>0.000</b> |
|                                           | HbA <sub>1c</sub> | 6  | -     | 0.136 | 0.838 | 0.642 | 1.095 | 0.196        |
|                                           |                   |    | 0.176 |       |       |       |       |              |
|                                           | FG                | 27 | -     | 0.102 | 0.989 | 0.809 | 1.208 | 0.911        |
|                                           |                   |    | 0.011 |       |       |       |       |              |
|                                           | FI                | 11 | -     | 0.183 | 0.886 | 0.619 | 1.269 | 0.509        |
|                                           |                   |    | 0.121 |       |       |       |       |              |
| <b>Atrial fibrillation and fluttering</b> | T2DM              | 80 | 0.003 | 0.022 | 1.003 | 0.961 | 1.047 | 0.891        |
|                                           | HbA <sub>1c</sub> | 6  | -     | 0.136 | 0.924 | 0.707 | 1.208 | 0.564        |
|                                           |                   |    | 0.079 |       |       |       |       |              |
|                                           | FG                | 27 | 0.023 | 0.099 | 1.023 | 0.842 | 1.243 | 0.818        |
|                                           |                   |    |       |       |       |       |       |              |
|                                           | FI                | 11 | -     | 0.180 | 0.841 | 0.591 | 1.197 | 0.336        |
|                                           |                   |    | 0.173 |       |       |       |       |              |
| <b>HDL cholesterol</b>                    | T2DM              | 80 | -     | 0.010 | 0.960 | 0.941 | 0.979 | <b>0.000</b> |
|                                           |                   |    | 0.041 |       |       |       |       |              |
|                                           | HbA <sub>1c</sub> | 6  | 0.065 | 0.062 | 1.067 | 0.946 | 1.204 | 0.290        |
|                                           |                   |    |       |       |       |       |       |              |
|                                           | FG                | 27 | 0.028 | 0.045 | 1.029 | 0.941 | 1.124 | 0.534        |
|                                           |                   |    |       |       |       |       |       |              |
|                                           | FI                | 11 | -     | 0.084 | 0.673 | 0.570 | 0.793 | <b>0.000</b> |
|                                           |                   |    | 0.397 |       |       |       |       |              |
| <b>LDL cholesterol</b>                    | T2DM              | 80 | -     | 0.015 | 0.965 | 0.936 | 0.994 | <b>0.017</b> |
|                                           |                   |    | 0.036 |       |       |       |       |              |
|                                           | HbA <sub>1c</sub> | 6  | 0.219 | 0.092 | 1.244 | 1.040 | 1.489 | <b>0.017</b> |
|                                           |                   |    |       |       |       |       |       |              |
|                                           | FG                | 27 | -     | 0.068 | 0.915 | 0.802 | 1.044 | 0.188        |
|                                           |                   |    | 0.089 |       |       |       |       |              |
|                                           | FI                | 11 | -     | 0.125 | 0.820 | 0.642 | 1.048 | 0.113        |
|                                           |                   |    | 0.198 |       |       |       |       |              |
| <b>Triglycerides</b>                      | T2DM              | 80 | 0.090 | 0.037 | 1.094 | 1.018 | 1.175 | <b>0.014</b> |
|                                           |                   |    |       |       |       |       |       |              |
|                                           | HbA <sub>1c</sub> | 6  | 0.079 | 0.222 | 1.083 | 0.701 | 1.673 | 0.720        |
|                                           |                   |    |       |       |       |       |       |              |
|                                           | FG                | 27 | -     | 0.164 | 0.779 | 0.565 | 1.074 | 0.128        |
|                                           |                   |    | 0.250 |       |       |       |       |              |
|                                           | FI                | 11 | 0.197 | 0.304 | 1.218 | 0.671 | 2.212 | 0.516        |
|                                           |                   |    |       |       |       |       |       |              |
| <b>Apolipoprotein A</b>                   | T2DM              | 80 | -     | 0.006 | 0.979 | 0.968 | 0.990 | <b>0.000</b> |
|                                           |                   |    | 0.021 |       |       |       |       |              |
|                                           | HbA <sub>1c</sub> | 6  | 0.042 | 0.035 | 1.043 | 0.974 | 1.117 | 0.227        |
|                                           |                   |    |       |       |       |       |       |              |



|                         |                   |    |       |       |       |       |       |              |
|-------------------------|-------------------|----|-------|-------|-------|-------|-------|--------------|
|                         | FG                | 27 | -     | 0.026 | 0.995 | 0.946 | 1.046 | 0.831        |
|                         |                   |    | 0.005 |       |       |       |       |              |
|                         | FI                | 11 | -     | 0.048 | 0.758 | 0.690 | 0.832 | <b>0.000</b> |
|                         |                   |    | 0.278 |       |       |       |       |              |
| <b>Apolipoprotein B</b> | T2DM              | 80 | -     | 0.005 | 0.995 | 0.986 | 1.005 | 0.301        |
|                         |                   |    | 0.005 |       |       |       |       |              |
|                         | HbA <sub>1c</sub> | 6  | 0.059 | 0.029 | 1.061 | 1.001 | 1.124 | <b>0.046</b> |
|                         | FG                | 27 | -     | 0.022 | 0.975 | 0.935 | 1.018 | 0.248        |
|                         |                   |    | 0.025 |       |       |       |       |              |
|                         | FI                | 11 | -     | 0.040 | 0.970 | 0.897 | 1.050 | 0.453        |
|                         |                   |    | 0.030 |       |       |       |       |              |
| <b>Lipoprotein A</b>    | T2DM              | 80 | 0.013 | 0.047 | 1.013 | 0.924 | 1.110 | 0.781        |
|                         | HbA <sub>1c</sub> | 6  | 0.363 | 0.283 | 1.437 | 0.825 | 2.502 | 0.200        |
|                         | FG                | 27 | -     | 0.209 | 0.832 | 0.552 | 1.254 | 0.380        |
|                         |                   |    | 0.184 |       |       |       |       |              |
|                         | FI                | 11 | -     | 0.388 | 0.540 | 0.252 | 1.156 | 0.112        |
|                         |                   |    | 0.616 |       |       |       |       |              |
